# Supplementary material for: Comparison of REST Cistromes across Human Cell Types Reveals Common and Context-Specific Functions
Source: PLoS Comput Biol. 2014 Jun 12;10(6):e1003671. doi: 10.1371/journal.pcbi.1003671 (PMC4055426; doi:10.1371/journal.pcbi.1003671)
Supplement: Table S2 — List of all REST peaks identified in all cell types, and their relationship to genes. (XLSX) [file pcbi.1003671.s010.xlsx]

## Sheet: Table_S2
chromosome	start	end	summit	enrichment score	q value	region	gene	gene name	cell
chr1	9963	10409	10175	185.528	3.88906	prot	NR_046018	DDX11L1	A549
chr1	100215	100815	100515	128.52	3.88906	distal	NM_001005484	OR4F5	A549
chr1	100268	100566	100446	445.734	3.77151	distal	NM_001005484	OR4F5	PFSK-1
chr1	100385	100536	100495	525.167	3.70372	distal	NM_001005484	OR4F5	GM12878
chr1	100402	100555	100482	120.725	4.31237	distal	NM_001005484	OR4F5	SK-N-SH
chr1	100407	100549	100500	77.0988	3.59073	distal	NM_001005484	OR4F5	U87
chr1	150929	151273	151101	173.29	3.77151	distal	NR_039983	LOC729737	PFSK-1
chr1	151060	151302	151185	141.768	3.59073	distal	NR_039983	LOC729737	U87
chr1	151066	151378	151224	137.647	3.88906	distal	NR_039983	LOC729737	A549
chr1	151097	151334	151211	207.018	4.31237	distal	NR_039983	LOC729737	SK-N-SH
chr1	151131	151401	151266	156.987	3.70372	distal	NR_039983	LOC729737	GM12878
chr1	237596	237940	237768	51.8715	3.34354	inter	none	NA	PFSK-1
chr1	246579	246939	246759	70.1072	3.11826	inter	none	NA	U87
chr1	246582	246880	246759	446.261	3.77151	inter	none	NA	PFSK-1
chr1	246641	246813	246810	147.95	3.88906	inter	none	NA	A549
chr1	246699	246850	246809	525.167	3.70372	inter	none	NA	GM12878
chr1	246718	246861	246799	123.437	4.31237	inter	none	NA	SK-N-SH
chr1	408276	408630	408452	190.495	3.88906	distal	NM_001005221|NM_001005224|NM_001005277	OR4F29|OR4F3|OR4F16	A549
chr1	408323	408633	408460	1058.14	3.77151	distal	NM_001005224|NM_001005221|NM_001005277	OR4F3|OR4F29|OR4F16	PFSK-1
chr1	408344	408566	408448	178.477	3.59073	distal	NM_001005224|NM_001005277|NM_001005221	OR4F3|OR4F16|OR4F29	U87
chr1	408344	408601	408455	1525.95	3.70372	distal	NM_001005224|NM_001005221|NM_001005277	OR4F3|OR4F29|OR4F16	GM12878
chr1	408348	408583	408458	323.07	4.31237	distal	NM_001005277|NM_001005224|NM_001005221	OR4F16|OR4F3|OR4F29	SK-N-SH
chr1	421377	421650	421501	280.028	3.77151	inter	none	NA	PFSK-1
chr1	461736	462080	461908	82.4053	3.77151	inter	none	NA	PFSK-1
chr1	521388	521732	521560	76.224	3.77151	inter	none	NA	PFSK-1
chr1	581804	582144	581990	1484.97	3.77151	distal	NM_001005224|NM_001005277|NM_001005221	OR4F3|OR4F16|OR4F29	PFSK-1
chr1	581842	582193	582022	249.648	3.88906	distal	NM_001005277|NM_001005221|NM_001005224	OR4F16|OR4F29|OR4F3	A549
chr1	581865	582124	581991	1939.86	3.70372	distal	NM_001005221|NM_001005224|NM_001005277	OR4F29|OR4F3|OR4F16	GM12878
chr1	581882	582119	581992	387.337	4.31237	distal	NM_001005221|NM_001005277|NM_001005224	OR4F29|OR4F16|OR4F3	SK-N-SH
chr1	581920	582129	582005	174.233	3.59073	distal	NM_001005277|NM_001005224|NM_001005221	OR4F16|OR4F3|OR4F29	U87
chr1	686602	686872	686737	84.5613	3.2346	distal	NR_028327	LOC100133331	GM12878
chr1	686629	686973	686801	172.975	3.77151	distal	NR_028327	LOC100133331	PFSK-1
chr1	686744	687095	686911	167.31	3.88906	distal	NR_028327	LOC100133331	A549
chr1	686801	687023	686902	242.538	4.31237	distal	NR_028327	LOC100133331	SK-N-SH
chr1	686816	687000	686886	122.916	3.59073	distal	NR_028327	LOC100133331	U87
chr1	840035	840194	840113	77.7241	4.22383	distal	NR_026874	LOC100130417	T cell
chr1	840159	840375	840267	38.0327	4.2441	distal	NR_026874	LOC100130417	H1 ESC
chr1	847362	847578	847470	54.6256	4.2441	distal	NR_026874	LOC100130417	H1 ESC
chr1	847362	847578	847470	92.8248	4.84183	distal	NR_026874	LOC100130417	K562
chr1	902122	902446	902284	39.8399	4.22383	prot	NM_001160184	PLEKHN1	T cell
chr1	1039692	1039925	1039818	126.226	3.92174	intron	NM_017891	C1orf159	HL-60
chr1	1111908	1111975	1111932	94.8625	4.2441	intron	NM_001130045	TTLL10	H1 ESC
chr1	1148240	1148584	1148412	80.3826	3.77151	prot	NM_003327	TNFRSF4	PFSK-1
chr1	1148280	1148520	1148340	107.152	4.22383	exon	NM_003327	TNFRSF4	T cell
chr1	1148310	1148477	1148394	107.075	3.92174	exon	NM_003327	TNFRSF4	HL-60
chr1	1234326	1234911	1234628	1695.93	4.0491	exon	NM_030649	ACAP3	ECC-1
chr1	1234383	1234858	1234625	414.1	3.88906	exon	NM_030649	ACAP3	A549
chr1	1234398	1234850	1234627	848.675	3.92174	exon	NM_030649	ACAP3	HL-60
chr1	1234424	1234829	1234617	546.813	3.59073	exon	NM_030649	ACAP3	U87
chr1	1234425	1234830	1234626	429.776	3.68797	exon	NM_030649	ACAP3	PANC-1
chr1	1234445	1234817	1234627	589.482	4.08618	exon	NM_030649	ACAP3	MCF-7
chr1	1234452	1234800	1234633	372.688	4.22383	exon	NM_030649	ACAP3	T cell
chr1	1234465	1234811	1234620	461.431	3.77151	exon	NM_030649	ACAP3	PFSK-1
chr1	1234488	1234768	1234627	2068.4	4.84183	exon	NM_030649	ACAP3	K562
chr1	1234499	1234768	1234621	376.989	4.31237	exon	NM_030649	ACAP3	SK-N-SH
chr1	1234501	1234777	1234626	2063.67	4.2441	exon	NM_030649	ACAP3	H1 ESC
chr1	1234505	1234756	1234627	1004.86	3.70372	exon	NM_030649	ACAP3	GM12878
chr1	1234509	1234766	1234623	608.591	3.55376	exon	NM_030649	ACAP3	HeLa S3
chr1	1235482	1235698	1235590	40.1205	4.2441	exon	NM_030649	ACAP3	H1 ESC
chr1	1235816	1236162	1235996	249.392	4.0491	exon	NM_030649	ACAP3	ECC-1
chr1	1235858	1236163	1236019	206.898	4.08618	exon	NM_030649	ACAP3	MCF-7
chr1	1235897	1236113	1236005	72.7281	4.2441	exon	NM_030649	ACAP3	H1 ESC
chr1	1235964	1236076	1236027	89.0807	4.84183	exon	NM_030649	ACAP3	K562
chr1	1270111	1270740	1270438	3926.54	4.0491	exon	NM_004421	DVL1	ECC-1
chr1	1270161	1270721	1270439	600.077	3.88906	exon	NM_004421	DVL1	A549
chr1	1270216	1270670	1270441	840.478	3.92174	exon	NM_004421	DVL1	HL-60
chr1	1270224	1270669	1270432	1255.71	4.08618	exon	NM_004421	DVL1	MCF-7
chr1	1270242	1270627	1270457	8500.72	4.2441	distal	NM_152228	TAS1R3	H1 ESC
chr1	1270267	1270635	1270456	527.197	3.59073	distal	NM_152228	TAS1R3	U87
chr1	1270270	1270626	1270445	4300.77	4.84183	distal	NM_152228	TAS1R3	K562
chr1	1270277	1270605	1270439	570.092	4.31237	distal	NM_152228	TAS1R3	SK-N-SH
chr1	1270280	1270634	1270454	678.783	3.77151	distal	NM_152228	TAS1R3	PFSK-1
chr1	1270303	1270599	1270451	819.811	3.55376	distal	NM_152228	TAS1R3	HeLa S3
chr1	1270310	1270575	1270453	772.477	3.70372	distal	NM_152228	TAS1R3	GM12878
chr1	1270334	1270530	1270412	103.585	4.22383	distal	NM_152228	TAS1R3	T cell
chr1	1342355	1342701	1342508	491.591	4.22383	prot	NM_017971	MRPL20	T cell
chr1	1342494	1342633	1342606	75.0516	4.37049	prot	NM_017971	MRPL20	Neuron
chr1	1342497	1342857	1342677	67.704	3.127	prot	NM_017971	MRPL20	U87
chr1	1408328	1408544	1408436	81.2105	4.2441	intron	NM_031921	ATAD3B	H1 ESC
chr1	1408355	1408495	1408436	138.534	4.84183	intron	NM_031921	ATAD3B	K562
chr1	1408360	1408496	1408444	105.836	3.92174	intron	NM_031921	ATAD3B	HL-60
chr1	1446945	1447545	1447245	95.8512	3.88906	prot	NM_001170535	ATAD3A	A549
chr1	1447212	1447294	1447292	46.2574	4.22383	prot	NM_001170535	ATAD3A	T cell
chr1	1476470	1476686	1476578	36.565	4.2441	prot	NM_001114748	TMEM240	H1 ESC
chr1	1509529	1509853	1509691	37.4419	4.22383	prot	NM_014188	SSU72	T cell
chr1	1535787	1536303	1536045	92.4566	3.92174	prot	NM_001242659	C1orf233	HL-60
chr1	1535801	1536301	1536051	55.6073	4.0491	prot	NM_001242659	C1orf233	ECC-1
chr1	1535818	1536174	1535995	351.297	4.22383	prot	NM_001242659	C1orf233	T cell
chr1	1535934	1536162	1536045	496.145	4.2441	prot	NM_001242659	C1orf233	H1 ESC
chr1	1535938	1536140	1536043	235.063	4.84183	prot	NM_001242659	C1orf233	K562
chr1	1564059	1564118	1564094	92.4704	4.2441	prot	NM_006983	MMP23B	H1 ESC
chr1	1714167	1714393	1714294	111.237	4.22383	prot	NM_001198994	NADK	T cell
chr1	1714183	1714381	1714280	142.507	3.92174	prot	NM_001198994	NADK	HL-60
chr1	1822425	1822563	1822497	58.953	4.22383	prot	NM_002074	GNB1	T cell
chr1	1875329	1875808	1875578	2151.81	4.22383	distal	NM_178545	TMEM52	T cell
chr1	1875370	1875774	1875584	230.074	3.88906	distal	NM_178545	TMEM52	A549
chr1	1875376	1875751	1875566	643.784	3.92174	distal	NM_178545	TMEM52	HL-60
chr1	1875392	1875740	1875569	344.173	4.0491	distal	NM_178545	TMEM52	ECC-1
chr1	1875419	1875735	1875571	249.428	4.08618	distal	NM_178545	TMEM52	MCF-7
chr1	1875429	1875679	1875556	213.502	3.68797	distal	NM_178545	TMEM52	PANC-1
chr1	1875430	1875702	1875579	364.359	4.31237	distal	NM_178545	TMEM52	SK-N-SH
chr1	1875437	1875709	1875571	310.504	3.77151	distal	NM_178545	TMEM52	PFSK-1
chr1	1875439	1875684	1875575	731.728	4.2441	distal	NM_178545	TMEM52	H1 ESC
chr1	1875445	1875698	1875577	950.986	4.84183	distal	NM_178545	TMEM52	K562
chr1	1875449	1875679	1875574	263.349	3.13598	distal	NM_178545	TMEM52	HeLa S3
chr1	1875464	1875676	1875577	212.784	3.58512	distal	NM_178545	TMEM52	HCT-116
chr1	1875470	1875692	1875577	606.168	3.70372	distal	NM_178545	TMEM52	GM12878
chr1	1875507	1875661	1875576	137.371	3.59073	distal	NM_178545	TMEM52	U87
chr1	1906316	1906637	1906477	212.647	4.0491	intron	NM_001080484	KIAA1751	ECC-1
chr1	1906361	1906591	1906470	483.582	4.2441	intron	NM_001080484	KIAA1751	H1 ESC
chr1	1906366	1906587	1906473	305.433	4.84183	intron	NM_001080484	KIAA1751	K562
chr1	1906422	1906572	1906475	172.724	3.65137	intron	NM_001080484	KIAA1751	Hep G2
chr1	1950836	1951448	1951178	2888.55	4.22383	prot	NM_000815	GABRD	T cell
chr1	1950907	1951453	1951164	1862.42	4.0491	prot	NM_000815	GABRD	ECC-1
chr1	1950946	1951375	1951163	1005.15	3.92174	prot	NM_000815	GABRD	HL-60
chr1	1950968	1951369	1951179	224.093	3.88906	prot	NM_000815	GABRD	A549
chr1	1950981	1951366	1951179	259.249	3.68797	prot	NM_000815	GABRD	PANC-1
chr1	1950993	1951340	1951173	564.046	4.08618	prot	NM_000815	GABRD	MCF-7
chr1	1951017	1951331	1951172	339.672	3.77151	prot	NM_000815	GABRD	PFSK-1
chr1	1951020	1951309	1951170	2674.18	4.84183	prot	NM_000815	GABRD	K562
chr1	1951021	1951323	1951173	485.772	3.58512	prot	NM_000815	GABRD	HCT-116
chr1	1951021	1951324	1951174	2840.68	3.65137	prot	NM_000815	GABRD	Hep G2
chr1	1951028	1951298	1951158	330.37	4.31237	prot	NM_000815	GABRD	SK-N-SH
chr1	1951034	1951308	1951170	1817.48	4.2441	prot	NM_000815	GABRD	H1 ESC
chr1	1951071	1951276	1951177	351.011	3.70372	prot	NM_000815	GABRD	GM12878
chr1	1951085	1951257	1951178	79.4611	3.59073	prot	NM_000815	GABRD	U87
chr1	1951092	1951235	1951174	120.551	2.82166	prot	NM_000815	GABRD	HeLa S3
chr1	1976367	1976521	1976430	60.7968	4.22383	distal	NM_002744	PRKCZ	T cell
chr1	2073931	2074447	2074189	85.435	3.92174	intron	NM_002744	PRKCZ	HL-60
chr1	2074068	2074314	2074206	117.695	4.0491	intron	NM_002744	PRKCZ	ECC-1
chr1	2074094	2074310	2074202	39.696	4.2441	intron	NM_002744	PRKCZ	H1 ESC
chr1	2105764	2105961	2105871	103.709	4.37049	intron	NM_002744	PRKCZ	Neuron
chr1	2250466	2250707	2250581	84.0007	4.37049	distal	NR_024489	LOC100129534	Neuron
chr1	2391320	2391716	2391499	550.624	4.0491	distal	NM_014638	PLCH2	ECC-1
chr1	2391338	2391656	2391515	172.32	3.88906	distal	NM_014638	PLCH2	A549
chr1	2391383	2391615	2391495	296.202	4.31237	distal	NM_014638	PLCH2	SK-N-SH
chr1	2391388	2391587	2391502	151.253	3.59073	distal	NM_014638	PLCH2	U87
chr1	2391403	2391612	2391497	204.487	3.65137	distal	NM_014638	PLCH2	Hep G2
chr1	2391404	2391603	2391493	126.236	3.77151	distal	NM_014638	PLCH2	PFSK-1
chr1	2391419	2391565	2391486	130.494	4.2441	distal	NM_014638	PLCH2	H1 ESC
chr1	2391421	2391514	2391491	104.728	2.85146	distal	NM_014638	PLCH2	HeLa S3
chr1	2391432	2391566	2391500	115.668	4.84183	distal	NM_014638	PLCH2	K562
chr1	2398715	2398931	2398823	45.2218	4.2441	distal	NM_014638	PLCH2	H1 ESC
chr1	2398836	2399069	2398930	97.6397	4.22383	distal	NM_014638	PLCH2	T cell
chr1	2399265	2400067	2399649	2820.19	4.0491	distal	NM_014638	PLCH2	ECC-1
chr1	2399286	2400036	2399640	4107.18	4.22383	distal	NM_014638	PLCH2	T cell
chr1	2399313	2399963	2399650	1051.86	3.88906	distal	NM_014638	PLCH2	A549
chr1	2399379	2400081	2399647	2125.22	3.92174	distal	NM_014638	PLCH2	HL-60
chr1	2399393	2400037	2399654	1708.64	3.68797	distal	NM_014638	PLCH2	PANC-1
chr1	2399408	2399885	2399643	1247.17	4.08618	distal	NM_014638	PLCH2	MCF-7
chr1	2399446	2399848	2399645	799.504	3.59073	distal	NM_014638	PLCH2	U87
chr1	2399461	2399842	2399653	1306.05	3.77151	distal	NM_014638	PLCH2	PFSK-1
chr1	2399466	2399827	2399647	3398.03	3.65137	distal	NM_014638	PLCH2	Hep G2
chr1	2399476	2399814	2399647	918.839	3.58512	distal	NM_014638	PLCH2	HCT-116
chr1	2399483	2399796	2399649	3595.11	4.84183	distal	NM_014638	PLCH2	K562
chr1	2399487	2399826	2399650	884.216	4.31237	distal	NM_014638	PLCH2	SK-N-SH
chr1	2399498	2399786	2399640	2056.64	3.70372	distal	NM_014638	PLCH2	GM12878
chr1	2399502	2399793	2399647	1447.04	3.55376	distal	NM_014638	PLCH2	HeLa S3
chr1	2399504	2399797	2399657	3009.48	4.2441	distal	NM_014638	PLCH2	H1 ESC
chr1	2413847	2414563	2414247	2224.08	4.0491	intron	NM_014638	PLCH2	ECC-1
chr1	2413993	2414450	2414242	944.946	3.68797	intron	NM_014638	PLCH2	PANC-1
chr1	2413997	2414453	2414246	1236.39	3.92174	intron	NM_014638	PLCH2	HL-60
chr1	2414002	2414438	2414236	400.08	3.88906	intron	NM_014638	PLCH2	A549
chr1	2414068	2414422	2414245	622.915	4.08618	intron	NM_014638	PLCH2	MCF-7
chr1	2414073	2414393	2414240	455.989	3.59073	intron	NM_014638	PLCH2	U87
chr1	2414099	2414386	2414234	1774.76	3.65137	intron	NM_014638	PLCH2	Hep G2
chr1	2414109	2414382	2414243	1504.7	4.84183	intron	NM_014638	PLCH2	K562
chr1	2414117	2414367	2414244	267.208	3.58512	intron	NM_014638	PLCH2	HCT-116
chr1	2414121	2414352	2414237	195.181	4.31237	intron	NM_014638	PLCH2	SK-N-SH
chr1	2414122	2414316	2414248	81.6866	4.22383	intron	NM_014638	PLCH2	T cell
chr1	2414125	2414368	2414246	496.205	3.55376	intron	NM_014638	PLCH2	HeLa S3
chr1	2414127	2414371	2414255	548.714	4.2441	intron	NM_014638	PLCH2	H1 ESC
chr1	2414134	2414351	2414247	99.4519	3.77151	intron	NM_014638	PLCH2	PFSK-1
chr1	2414140	2414336	2414233	490.496	3.70372	intron	NM_014638	PLCH2	GM12878
chr1	2439172	2439515	2439331	151.012	4.0491	distal	NM_018216	PANK4	ECC-1
chr1	2439202	2439462	2439332	67.4111	2.56248	distal	NM_018216	PANK4	Hep G2
chr1	2439229	2439461	2439339	120.984	3.68797	distal	NM_018216	PANK4	PANC-1
chr1	2439291	2439385	2439336	94.7855	4.2441	distal	NM_018216	PANK4	H1 ESC
chr1	2487719	2487979	2487849	63.4836	2.36254	prot	NM_003820	TNFRSF14	Hep G2
chr1	2487736	2487901	2487854	96.5715	4.0491	prot	NM_003820	TNFRSF14	ECC-1
chr1	2487754	2487970	2487862	36.251	4.2441	prot	NM_003820	TNFRSF14	H1 ESC
chr1	2517706	2518120	2517945	912.813	4.22383	prot	NR_036637	FAM213B	T cell
chr1	2517821	2518032	2517917	208.359	4.84183	prot	NR_036637	FAM213B	K562
chr1	2517824	2518094	2517959	163.207	3.70372	prot	NR_036637	FAM213B	GM12878
chr1	2517825	2518065	2517945	89.121	2.88555	prot	NR_036637	FAM213B	HeLa S3
chr1	2517867	2518007	2517919	121.204	3.92174	prot	NR_036637	FAM213B	HL-60
chr1	2517900	2518019	2517960	130.582	4.2441	prot	NR_036637	FAM213B	H1 ESC
chr1	3021523	3021590	3021578	85.7004	4.2441	intron	NM_022114	PRDM16	H1 ESC
chr1	3174332	3174701	3174522	310.693	4.0491	intron	NM_022114	PRDM16	ECC-1
chr1	3174357	3174676	3174518	168.851	3.68797	intron	NM_022114	PRDM16	PANC-1
chr1	3174359	3174656	3174508	194.386	4.08618	intron	NM_022114	PRDM16	MCF-7
chr1	3174372	3174642	3174507	115.347	3.70372	intron	NM_022114	PRDM16	GM12878
chr1	3174386	3174657	3174506	165.394	3.92174	intron	NM_022114	PRDM16	HL-60
chr1	3174391	3174635	3174509	361.647	3.65137	intron	NM_022114	PRDM16	Hep G2
chr1	3174400	3174626	3174505	432.342	4.84183	intron	NM_022114	PRDM16	K562
chr1	3174408	3174635	3174521	563.262	4.2441	intron	NM_022114	PRDM16	H1 ESC
chr1	3174442	3174617	3174529	184.626	2.99308	intron	NM_022114	PRDM16	HeLa S3
chr1	3279654	3279848	3279753	221.779	4.2441	intron	NM_022114	PRDM16	H1 ESC
chr1	3418544	3419122	3418851	724.354	3.88906	intron	NM_001409	MEGF6	A549
chr1	3418603	3419141	3418860	1857.81	4.0491	intron	NM_001409	MEGF6	ECC-1
chr1	3418617	3419127	3418862	1061.17	3.68797	intron	NM_001409	MEGF6	PANC-1
chr1	3418652	3419054	3418856	701.993	4.08618	intron	NM_001409	MEGF6	MCF-7
chr1	3418659	3419089	3418860	931.003	3.92174	intron	NM_001409	MEGF6	HL-60
chr1	3418687	3419028	3418851	2496.88	3.65137	intron	NM_001409	MEGF6	Hep G2
chr1	3418697	3419011	3418857	2602.23	4.2441	intron	NM_001409	MEGF6	H1 ESC
chr1	3418709	3419007	3418856	505.366	3.77151	intron	NM_001409	MEGF6	PFSK-1
chr1	3418711	3419007	3418860	684.006	4.31237	intron	NM_001409	MEGF6	SK-N-SH
chr1	3418713	3419009	3418860	324.929	3.59073	intron	NM_001409	MEGF6	U87
chr1	3418714	3418994	3418855	1995.61	4.84183	intron	NM_001409	MEGF6	K562
chr1	3418719	3419006	3418857	1433.64	3.55376	intron	NM_001409	MEGF6	HeLa S3
chr1	3418722	3419023	3418879	421.17	4.22383	intron	NM_001409	MEGF6	T cell
chr1	3418763	3418957	3418851	332.445	3.70372	intron	NM_001409	MEGF6	GM12878
chr1	3528647	3529147	3528897	60.8932	4.0491	prot	NM_001409	MEGF6	ECC-1
chr1	3542052	3542165	3542114	40.4191	4.22383	prot	NM_182752	TPRG1L	T cell
chr1	3594132	3594648	3594390	98.415	3.92174	intron	NM_001204186	TP73	HL-60
chr1	3623888	3624388	3624138	67.6544	4.0491	exon	NM_001204186	TP73	ECC-1
chr1	3624009	3624225	3624117	78.7474	4.2441	exon	NM_001204186	TP73	H1 ESC
chr1	3631496	3631756	3631626	45.7713	1.36472	intron	NM_001204186	TP73	Hep G2
chr1	3631515	3631731	3631623	52.527	4.2441	intron	NM_001204186	TP73	H1 ESC
chr1	3631530	3631723	3631638	75.4017	4.0491	intron	NM_001204186	TP73	ECC-1
chr1	3631569	3631712	3631642	124.515	4.84183	intron	NM_001204186	TP73	K562
chr1	3634303	3635045	3634746	2674.61	4.0491	intron	NM_001204186	TP73	ECC-1
chr1	3634346	3635001	3634746	2225.66	3.92174	intron	NM_001204186	TP73	HL-60
chr1	3634531	3634875	3634728	179.979	3.88906	intron	NM_001204186	TP73	A549
chr1	3634536	3634883	3634713	325.612	3.68797	intron	NM_001204186	TP73	PANC-1
chr1	3634540	3634901	3634747	3746.62	4.84183	intron	NM_001204186	TP73	K562
chr1	3634549	3634923	3634737	2339.71	3.65137	intron	NM_001204186	TP73	Hep G2
chr1	3634588	3634875	3634734	1254.12	4.2441	intron	NM_001204186	TP73	H1 ESC
chr1	3634591	3634873	3634734	991.311	3.70372	intron	NM_001204186	TP73	GM12878
chr1	3634591	3634894	3634743	285.888	4.22383	intron	NM_001204186	TP73	T cell
chr1	3634592	3634874	3634737	308.857	3.58512	intron	NM_001204186	TP73	HCT-116
chr1	3634601	3634881	3634741	68.5038	4.31237	intron	NM_001204186	TP73	SK-N-SH
chr1	3634614	3634802	3634732	119.37	3.59073	intron	NM_001204186	TP73	U87
chr1	3691491	3691660	3691591	134.469	4.84183	intron	NM_001163724	SMIM1	K562
chr1	3691922	3692422	3692172	58.7833	4.0491	exon	NM_001163724	SMIM1	ECC-1
chr1	3712991	3713315	3713153	45.4121	4.22383	prot	NM_020710	LRRC47	T cell
chr1	3774127	3774208	3774136	39.9533	4.22383	prot	NM_004402	DFFB	T cell
chr1	4025917	4026030	4025949	125.46	4.2441	distal	NR_040065	LOC728716	H1 ESC
chr1	4028815	4029350	4029105	1087.22	4.0491	distal	NR_040065	LOC728716	ECC-1
chr1	4028881	4029315	4029104	636.461	3.92174	distal	NR_040065	LOC728716	HL-60
chr1	4028900	4029312	4029092	315.553	3.68797	distal	NR_040065	LOC728716	PANC-1
chr1	4028925	4029300	4029104	228.02	3.88906	distal	NR_040065	LOC728716	A549
chr1	4028931	4029263	4029104	271.99	4.08618	distal	NR_040065	LOC728716	MCF-7
chr1	4028958	4029244	4029109	239.258	3.77151	distal	NR_040065	LOC728716	PFSK-1
chr1	4028959	4029233	4029093	276.076	3.58512	distal	NR_040065	LOC728716	HCT-116
chr1	4028961	4029288	4029113	335.087	4.22383	distal	NR_040065	LOC728716	T cell
chr1	4028968	4029248	4029102	1998.28	4.2441	distal	NR_040065	LOC728716	H1 ESC
chr1	4028969	4029233	4029101	580.756	3.55376	distal	NR_040065	LOC728716	HeLa S3
chr1	4028970	4029250	4029103	2316.77	4.84183	distal	NR_040065	LOC728716	K562
chr1	4028975	4029230	4029107	446.951	3.65137	distal	NR_040065	LOC728716	Hep G2
chr1	4028986	4029206	4029099	535.515	3.70372	distal	NR_040065	LOC728716	GM12878
chr1	4046992	4047174	4047075	82.6735	4.0491	distal	NR_040065	LOC728716	ECC-1
chr1	4047010	4047177	4047107	169.308	4.2441	distal	NR_040065	LOC728716	H1 ESC
chr1	4226020	4226313	4226177	161.13	4.37049	inter	none	NA	Neuron
chr1	4332582	4333086	4332834	46.2091	2.59247	inter	none	NA	PANC-1
chr1	4332697	4332907	4332810	84.6056	4.08618	inter	none	NA	MCF-7
chr1	4332698	4332914	4332806	61.73	4.2441	inter	none	NA	H1 ESC
chr1	4332708	4332896	4332803	151.129	3.65137	inter	none	NA	Hep G2
chr1	4508094	4508364	4508217	167.017	4.37049	distal	NR_027088	LOC284661	Neuron
chr1	4510635	4511135	4510885	61.1358	4.0491	distal	NR_027088	LOC284661	ECC-1
chr1	4510822	4510972	4510895	147.634	4.2441	distal	NR_027088	LOC284661	H1 ESC
chr1	4609921	4610425	4610181	1237.01	4.0491	inter	none	NA	ECC-1
chr1	4609971	4610462	4610187	1002.28	3.92174	inter	none	NA	HL-60
chr1	4609983	4610383	4610185	842.77	4.08618	inter	none	NA	MCF-7
chr1	4609994	4610310	4610170	449.825	4.22383	inter	none	NA	T cell
chr1	4609996	4610389	4610198	295.241	3.88906	inter	none	NA	A549
chr1	4610003	4610383	4610173	232.46	3.68797	inter	none	NA	PANC-1
chr1	4610042	4610316	4610181	1369.74	4.2441	inter	none	NA	H1 ESC
chr1	4610044	4610314	4610179	210.191	3.70372	inter	none	NA	GM12878
chr1	4610058	4610308	4610198	1315.6	4.84183	inter	none	NA	K562
chr1	4610063	4610308	4610196	525.142	3.55376	inter	none	NA	HeLa S3
chr1	4610071	4610292	4610192	132.178	3.58512	inter	none	NA	HCT-116
chr1	4610090	4610287	4610184	150.228	3.65137	inter	none	NA	Hep G2
chr1	4991505	4992005	4991755	58.2895	4.0491	inter	none	NA	ECC-1
chr1	5061490	5061972	5061725	957.834	4.0491	inter	none	NA	ECC-1
chr1	5061503	5061858	5061720	439.407	4.22383	inter	none	NA	T cell
chr1	5061529	5061935	5061728	546.652	3.92174	inter	none	NA	HL-60
chr1	5061548	5061918	5061725	426.171	4.08618	inter	none	NA	MCF-7
chr1	5061562	5061825	5061717	129.206	3.68797	inter	none	NA	PANC-1
chr1	5061585	5061869	5061726	1787.67	4.2441	inter	none	NA	H1 ESC
chr1	5061610	5061841	5061724	529.283	4.84183	inter	none	NA	K562
chr1	5061616	5061827	5061716	150.951	3.65137	inter	none	NA	Hep G2
chr1	5061625	5061834	5061729	313.12	3.0947	inter	none	NA	HeLa S3
chr1	5061636	5061807	5061716	299.736	3.70372	inter	none	NA	GM12878
chr1	5061691	5061799	5061718	65.1657	2.75902	inter	none	NA	HCT-116
chr1	5258374	5258825	5258599	965.435	4.0491	inter	none	NA	ECC-1
chr1	5258407	5258774	5258597	771.134	4.08618	inter	none	NA	MCF-7
chr1	5258412	5258786	5258607	530.4	3.92174	inter	none	NA	HL-60
chr1	5258454	5258724	5258589	222.317	3.70372	inter	none	NA	GM12878
chr1	5258482	5258725	5258603	1093.49	4.2441	inter	none	NA	H1 ESC
chr1	5258491	5258767	5258605	156.006	3.68797	inter	none	NA	PANC-1
chr1	5258493	5258698	5258589	238.197	3.16067	inter	none	NA	HeLa S3
chr1	5258505	5258696	5258607	248.315	4.84183	inter	none	NA	K562
chr1	5258575	5258642	5258603	86.3294	3.65137	inter	none	NA	Hep G2
chr1	5347182	5347686	5347434	39.8967	2.00948	inter	none	NA	PANC-1
chr1	5347231	5347636	5347436	565.406	4.0491	inter	none	NA	ECC-1
chr1	5347330	5347546	5347438	76.5812	4.84183	inter	none	NA	K562
chr1	5347354	5347535	5347439	95.6391	3.92174	inter	none	NA	HL-60
chr1	5356636	5356830	5356746	82.8655	4.37049	inter	none	NA	Neuron
chr1	5378248	5378532	5378399	133.212	4.37049	inter	none	NA	Neuron
chr1	5462705	5462947	5462845	98.4389	4.0491	inter	none	NA	ECC-1
chr1	5464237	5464616	5464428	293.566	4.0491	inter	none	NA	ECC-1
chr1	5464399	5464464	5464432	87.8873	4.2441	inter	none	NA	H1 ESC
chr1	5507819	5508134	5507971	152.526	4.0491	inter	none	NA	ECC-1
chr1	5507887	5508103	5507995	77.1844	4.2441	inter	none	NA	H1 ESC
chr1	5614151	5614527	5614339	61.9855	2.43425	distal	NR_039612	MIR4417	HCT-116
chr1	5614214	5614535	5614378	239.114	4.0491	distal	NR_039612	MIR4417	ECC-1
chr1	5681010	5681394	5681197	356.908	4.0491	inter	none	NA	ECC-1
chr1	5681030	5681406	5681218	39.056	1.05153	inter	none	NA	HCT-116
chr1	5681057	5681342	5681189	142.623	4.08618	inter	none	NA	MCF-7
chr1	5681089	5681306	5681200	342.106	4.2441	inter	none	NA	H1 ESC
chr1	5816979	5817250	5817103	156.173	4.0491	inter	none	NA	ECC-1
chr1	5816997	5817213	5817105	79.6061	4.2441	inter	none	NA	H1 ESC
chr1	5860175	5860391	5860283	40.7349	4.2441	inter	none	NA	H1 ESC
chr1	5860186	5860437	5860322	57.9419	4.0491	inter	none	NA	ECC-1
chr1	5907124	5907861	5907552	2537.93	4.0491	distal	NR_039838	MIR4689	ECC-1
chr1	5907207	5907959	5907546	3122.62	3.92174	distal	NR_039838	MIR4689	HL-60
chr1	5907222	5907800	5907550	1790.71	4.22383	distal	NR_039838	MIR4689	T cell
chr1	5907294	5907781	5907544	509.626	3.88906	distal	NR_039838	MIR4689	A549
chr1	5907305	5907771	5907538	889.93	3.68797	distal	NR_039838	MIR4689	PANC-1
chr1	5907315	5907764	5907544	1266.24	4.08618	distal	NR_039838	MIR4689	MCF-7
chr1	5907362	5907700	5907547	4839.9	4.84183	distal	NR_039838	MIR4689	K562
chr1	5907369	5907714	5907552	686.134	3.58512	distal	NR_039838	MIR4689	HCT-116
chr1	5907371	5907714	5907540	3927.85	4.2441	distal	NR_039838	MIR4689	H1 ESC
chr1	5907372	5907714	5907545	755.343	3.77151	distal	NR_039838	MIR4689	PFSK-1
chr1	5907392	5907706	5907545	4646.72	3.65137	distal	NR_039838	MIR4689	Hep G2
chr1	5907399	5907679	5907539	898.833	3.55376	distal	NR_039838	MIR4689	HeLa S3
chr1	5907402	5907701	5907545	296.563	3.59073	distal	NR_039838	MIR4689	U87
chr1	5907409	5907689	5907545	1822.99	3.70372	distal	NR_039838	MIR4689	GM12878
chr1	5907451	5907639	5907570	104.721	4.31237	distal	NR_039838	MIR4689	SK-N-SH
chr1	5945944	5946160	5946052	109.767	4.84183	intron	NM_015102	NPHP4	K562
chr1	6086233	6086557	6086395	54.087	4.22383	exon	NM_001199861	KCNAB2	T cell
chr1	6101624	6101738	6101703	98.9829	3.77151	intron	NM_001199861	KCNAB2	PFSK-1
chr1	6111376	6111700	6111538	44.8668	4.22383	exon	NM_001199861	KCNAB2	T cell
chr1	6112343	6113067	6112686	3264.79	4.22383	intron	NM_001199861	KCNAB2	T cell
chr1	6112398	6113158	6112683	2642.64	4.0491	intron	NM_001199861	KCNAB2	ECC-1
chr1	6112410	6113104	6112683	1782.45	3.68797	intron	NM_001199861	KCNAB2	PANC-1
chr1	6112425	6113227	6112683	1621.78	3.88906	intron	NM_001199861	KCNAB2	A549
chr1	6112446	6112926	6112683	2351.78	3.92174	intron	NM_001199861	KCNAB2	HL-60
chr1	6112474	6112919	6112683	1580.31	4.08618	intron	NM_001199861	KCNAB2	MCF-7
chr1	6112490	6112943	6112685	2069.2	3.77151	intron	NM_001199861	KCNAB2	PFSK-1
chr1	6112498	6112891	6112683	2032.96	3.58512	intron	NM_001199861	KCNAB2	HCT-116
chr1	6112519	6112851	6112683	7407.14	4.84183	intron	NM_001199861	KCNAB2	K562
chr1	6112520	6112850	6112683	1981.07	4.31237	intron	NM_001199861	KCNAB2	SK-N-SH
chr1	6112531	6112832	6112684	4428.04	4.2441	intron	NM_001199861	KCNAB2	H1 ESC
chr1	6112539	6112821	6112678	1961.98	3.55376	intron	NM_001199861	KCNAB2	HeLa S3
chr1	6112539	6112828	6112689	1836.35	3.65137	intron	NM_001199861	KCNAB2	Hep G2
chr1	6112547	6112831	6112697	320.419	3.59073	intron	NM_001199861	KCNAB2	U87
chr1	6112570	6112810	6112692	742.704	3.70372	intron	NM_001199861	KCNAB2	GM12878
chr1	6112578	6112789	6112691	104.204	4.37049	intron	NM_001199861	KCNAB2	Neuron
chr1	6113061	6113186	6113077	101.996	4.84183	intron	NM_001199861	KCNAB2	K562
chr1	6113064	6113280	6113172	64.7669	4.2441	intron	NM_001199861	KCNAB2	H1 ESC
chr1	6168994	6169152	6169077	108.87	3.77151	intron	NM_015557	CHD5	PFSK-1
chr1	6221436	6222212	6221887	2703.92	4.0491	intron	NM_015557	CHD5	ECC-1
chr1	6221475	6222112	6221878	3451.77	3.77151	intron	NM_015557	CHD5	PFSK-1
chr1	6221600	6222150	6221876	754.947	3.88906	intron	NM_015557	CHD5	A549
chr1	6221617	6222204	6221887	1666.32	3.92174	intron	NM_015557	CHD5	HL-60
chr1	6221619	6222133	6221882	1049.74	4.08618	intron	NM_015557	CHD5	MCF-7
chr1	6221652	6222143	6221878	740.806	3.68797	intron	NM_015557	CHD5	PANC-1
chr1	6221655	6222096	6221875	1010.35	3.58512	intron	NM_015557	CHD5	HCT-116
chr1	6221693	6222054	6221892	410.702	3.59073	intron	NM_015557	CHD5	U87
chr1	6221700	6222074	6221887	3917.91	4.84183	intron	NM_015557	CHD5	K562
chr1	6221714	6222053	6221882	3011.3	3.65137	intron	NM_015557	CHD5	Hep G2
chr1	6221723	6222037	6221877	675.213	4.31237	intron	NM_015557	CHD5	SK-N-SH
chr1	6221726	6222144	6221885	570.066	4.22383	intron	NM_015557	CHD5	T cell
chr1	6221738	6222024	6221892	3224.63	4.2441	intron	NM_015557	CHD5	H1 ESC
chr1	6221739	6222037	6221884	1174.13	3.55376	intron	NM_015557	CHD5	HeLa S3
chr1	6221762	6222007	6221882	721.575	3.70372	intron	NM_015557	CHD5	GM12878
chr1	6259334	6259850	6259592	99.9072	3.92174	prot	NM_000983	RPL22	HL-60
chr1	6259535	6259695	6259634	76.5659	4.22383	prot	NM_000983	RPL22	T cell
chr1	6265300	6265516	6265408	83.8403	4.84183	prot	NM_207396	RNF207	K562
chr1	6298706	6299050	6298878	52.6127	3.33839	prot	NM_012405	ICMT	PFSK-1
chr1	6302637	6302853	6302745	51.734	4.2441	prot	NM_001024598	HES3	H1 ESC
chr1	6302645	6302819	6302727	66.1029	4.0491	prot	NM_001024598	HES3	ECC-1
chr1	6302700	6302844	6302747	150.738	3.65137	prot	NM_001024598	HES3	Hep G2
chr1	6304127	6304451	6304289	45.9178	4.22383	prot	NM_001024598	HES3	T cell
chr1	6305042	6305757	6305305	4488.74	3.88906	prot	NM_001024598	HES3	A549
chr1	6305065	6305627	6305305	11588.6	3.92174	prot	NM_001024598	HES3	HL-60
chr1	6305067	6305640	6305305	5800.63	4.0491	prot	NM_001024598	HES3	ECC-1
chr1	6305068	6305582	6305304	3225.95	3.68797	prot	NM_001024598	HES3	PANC-1
chr1	6305083	6305542	6305300	11147.5	3.77151	prot	NM_001024598	HES3	PFSK-1
chr1	6305085	6305864	6305298	32302.2	4.22383	prot	NM_001024598	HES3	T cell
chr1	6305086	6305545	6305303	4195.56	4.08618	prot	NM_001024598	HES3	MCF-7
chr1	6305110	6305494	6305294	5134.27	3.59073	prot	NM_001024598	HES3	U87
chr1	6305125	6305522	6305304	20688.7	3.65137	prot	NM_001024598	HES3	Hep G2
chr1	6305133	6305508	6305300	18859.4	4.84183	prot	NM_001024598	HES3	K562
chr1	6305137	6305503	6305298	4571.55	4.31237	prot	NM_001024598	HES3	SK-N-SH
chr1	6305144	6305457	6305301	4712.1	4.2441	prot	NM_001024598	HES3	H1 ESC
chr1	6305144	6305494	6305308	12477	3.70372	prot	NM_001024598	HES3	GM12878
chr1	6305150	6305469	6305301	6272.26	3.55376	prot	NM_001024598	HES3	HeLa S3
chr1	6305159	6305445	6305301	191.444	4.37049	prot	NM_001024598	HES3	Neuron
chr1	6306715	6307134	6306925	403.064	4.22383	distal	NM_001024598	HES3	T cell
chr1	6306724	6307068	6306896	54.2095	3.32654	distal	NM_001024598	HES3	PFSK-1
chr1	6306815	6307075	6306945	110.298	3.65137	distal	NM_001024598	HES3	Hep G2
chr1	6336285	6336775	6336530	77.3616	4.37049	intron	NM_007274	ACOT7	Neuron
chr1	6363581	6364181	6363881	102.511	3.88906	intron	NM_007274	ACOT7	A549
chr1	6363727	6363979	6363858	109.323	4.0491	intron	NM_007274	ACOT7	ECC-1
chr1	6363773	6363904	6363846	138.836	4.84183	intron	NM_007274	ACOT7	K562
chr1	6363774	6363906	6363835	123.066	4.2441	intron	NM_007274	ACOT7	H1 ESC
chr1	6363795	6363930	6363853	94.1536	4.31237	intron	NM_007274	ACOT7	SK-N-SH
chr1	6363798	6363924	6363872	90.723	3.68797	intron	NM_007274	ACOT7	PANC-1
chr1	6453661	6453852	6453759	87.4298	4.37049	prot	NM_007274	ACOT7	Neuron
chr1	6480830	6481220	6481028	279.92	4.0491	prot	NM_019089	HES2	ECC-1
chr1	6480920	6481106	6481011	180.121	4.2441	prot	NM_019089	HES2	H1 ESC
chr1	6480921	6481091	6481004	171.416	4.84183	prot	NM_019089	HES2	K562
chr1	6662390	6662808	6662617	461.32	4.22383	prot	NM_014851	KLHL21	T cell
chr1	6761838	6761951	6761935	40.2149	4.22383	prot	NM_018198	DNAJC11	T cell
chr1	7062812	7063160	7063001	308.984	4.0491	intron	NM_015215	CAMTA1	ECC-1
chr1	7062822	7063147	7062986	156.381	3.88906	intron	NM_015215	CAMTA1	A549
chr1	7062855	7063109	7062975	149.34	3.77151	intron	NM_015215	CAMTA1	PFSK-1
chr1	7062857	7063117	7062988	1004.5	3.55376	intron	NM_015215	CAMTA1	HeLa S3
chr1	7062858	7063128	7062993	136.665	3.70372	intron	NM_015215	CAMTA1	GM12878
chr1	7062866	7063045	7062969	106.985	3.59073	intron	NM_015215	CAMTA1	U87
chr1	7062872	7063113	7063006	637.069	4.2441	intron	NM_015215	CAMTA1	H1 ESC
chr1	7062879	7063100	7062993	441.208	4.84183	intron	NM_015215	CAMTA1	K562
chr1	7062886	7063082	7062977	134.533	3.68797	intron	NM_015215	CAMTA1	PANC-1
chr1	7069952	7070168	7070060	63.9759	4.2441	intron	NM_015215	CAMTA1	H1 ESC
chr1	7070782	7071282	7071032	63.1432	4.0491	intron	NM_015215	CAMTA1	ECC-1
chr1	7070945	7071114	7071039	188.319	4.2441	intron	NM_015215	CAMTA1	H1 ESC
chr1	7106271	7106721	7106497	1112.77	4.0491	intron	NM_015215	CAMTA1	ECC-1
chr1	7106293	7106722	7106504	373.472	3.88906	intron	NM_015215	CAMTA1	A549
chr1	7106316	7106693	7106503	487.522	3.92174	intron	NM_015215	CAMTA1	HL-60
chr1	7106316	7106730	7106505	964.245	4.08618	intron	NM_015215	CAMTA1	MCF-7
chr1	7106324	7106705	7106520	3183.67	3.77151	intron	NM_015215	CAMTA1	PFSK-1
chr1	7106339	7106608	7106493	174.624	3.68797	intron	NM_015215	CAMTA1	PANC-1
chr1	7106350	7106681	7106515	713.712	3.59073	intron	NM_015215	CAMTA1	U87
chr1	7106351	7106663	7106502	701.085	3.58512	intron	NM_015215	CAMTA1	HCT-116
chr1	7106359	7106647	7106510	686.796	4.31237	intron	NM_015215	CAMTA1	SK-N-SH
chr1	7106363	7106642	7106505	2186.78	4.2441	intron	NM_015215	CAMTA1	H1 ESC
chr1	7106366	7106642	7106506	1490.37	3.55376	intron	NM_015215	CAMTA1	HeLa S3
chr1	7106377	7106629	7106513	464.272	3.65137	intron	NM_015215	CAMTA1	Hep G2
chr1	7106377	7106647	7106512	88.2006	3.70372	intron	NM_015215	CAMTA1	GM12878
chr1	7106388	7106622	7106498	605.444	4.84183	intron	NM_015215	CAMTA1	K562
chr1	7130479	7130823	7130651	61.0091	3.77151	intron	NM_015215	CAMTA1	PFSK-1
chr1	7135135	7135943	7135581	4528.37	4.22383	intron	NM_015215	CAMTA1	T cell
chr1	7135273	7135823	7135584	2489.96	4.0491	intron	NM_015215	CAMTA1	ECC-1
chr1	7135304	7135859	7135584	4308.19	3.92174	intron	NM_015215	CAMTA1	HL-60
chr1	7135313	7135796	7135584	857.741	3.68797	intron	NM_015215	CAMTA1	PANC-1
chr1	7135337	7135823	7135584	1161.22	3.88906	intron	NM_015215	CAMTA1	A549
chr1	7135377	7135779	7135586	2114.02	4.08618	intron	NM_015215	CAMTA1	MCF-7
chr1	7135378	7135771	7135585	6393.51	3.77151	intron	NM_015215	CAMTA1	PFSK-1
chr1	7135384	7135762	7135574	2220.36	3.58512	intron	NM_015215	CAMTA1	HCT-116
chr1	7135425	7135739	7135584	2328.07	3.59073	intron	NM_015215	CAMTA1	U87
chr1	7135429	7135729	7135579	3808.16	3.55376	intron	NM_015215	CAMTA1	HeLa S3
chr1	7135429	7135738	7135582	1352.19	4.31237	intron	NM_015215	CAMTA1	SK-N-SH
chr1	7135431	7135728	7135582	4983.99	3.65137	intron	NM_015215	CAMTA1	Hep G2
chr1	7135435	7135721	7135585	4615.92	4.2441	intron	NM_015215	CAMTA1	H1 ESC
chr1	7135435	7135724	7135584	4816.73	4.84183	intron	NM_015215	CAMTA1	K562
chr1	7135444	7135724	7135581	2957.51	3.70372	intron	NM_015215	CAMTA1	GM12878
chr1	7135501	7135661	7135584	79.5089	4.37049	intron	NM_015215	CAMTA1	Neuron
chr1	7238793	7239169	7238981	44.4953	1.39813	intron	NM_015215	CAMTA1	HCT-116
chr1	7238938	7239057	7239000	65.7496	3.77151	intron	NM_015215	CAMTA1	PFSK-1
chr1	7238941	7239053	7239000	125.18	4.2441	intron	NM_015215	CAMTA1	H1 ESC
chr1	7321543	7321759	7321651	40.4715	4.2441	intron	NM_015215	CAMTA1	H1 ESC
chr1	7439648	7440138	7439893	78.9407	4.37049	intron	NM_015215	CAMTA1	Neuron
chr1	7462105	7462231	7462136	76.0896	4.37049	intron	NM_015215	CAMTA1	Neuron
chr1	7528264	7528768	7528516	47.6348	2.71729	intron	NM_015215	CAMTA1	PANC-1
chr1	7528358	7528702	7528530	65.4386	3.77151	intron	NM_015215	CAMTA1	PFSK-1
chr1	7528385	7528677	7528526	196.634	4.0491	intron	NM_015215	CAMTA1	ECC-1
chr1	7528418	7528619	7528509	125.216	4.31237	intron	NM_015215	CAMTA1	SK-N-SH
chr1	7528427	7528643	7528535	38.2911	4.2441	intron	NM_015215	CAMTA1	H1 ESC
chr1	7528433	7528604	7528534	96.6106	3.88906	intron	NM_015215	CAMTA1	A549
chr1	7528444	7528608	7528536	110.018	3.59073	intron	NM_015215	CAMTA1	U87
chr1	7528453	7528545	7528527	81.1116	2.82223	intron	NM_015215	CAMTA1	HeLa S3
chr1	7590465	7590657	7590571	236.946	4.2441	intron	NM_015215	CAMTA1	H1 ESC
chr1	7655412	7655788	7655600	62.8054	2.49405	intron	NM_015215	CAMTA1	HCT-116
chr1	7655457	7655743	7655603	177.869	3.92174	intron	NM_015215	CAMTA1	HL-60
chr1	7655470	7655749	7655611	130.692	4.08618	intron	NM_015215	CAMTA1	MCF-7
chr1	7655485	7655741	7655610	190.833	3.77151	intron	NM_015215	CAMTA1	PFSK-1
chr1	7655488	7655738	7655613	727.062	4.2441	intron	NM_015215	CAMTA1	H1 ESC
chr1	7655493	7655730	7655604	395.672	3.55376	intron	NM_015215	CAMTA1	HeLa S3
chr1	7655495	7655724	7655611	106.242	4.0491	intron	NM_015215	CAMTA1	ECC-1
chr1	7655500	7655686	7655610	92.6675	3.88906	intron	NM_015215	CAMTA1	A549
chr1	7655502	7655671	7655615	99.2327	3.68797	intron	NM_015215	CAMTA1	PANC-1
chr1	7655513	7655715	7655610	264.583	4.84183	intron	NM_015215	CAMTA1	K562
chr1	7655537	7655691	7655616	78.7514	4.31237	intron	NM_015215	CAMTA1	SK-N-SH
chr1	7655543	7655701	7655618	100.534	3.59073	intron	NM_015215	CAMTA1	U87
chr1	7676315	7676908	7676606	2415.18	4.22383	intron	NM_015215	CAMTA1	T cell
chr1	7676320	7676979	7676594	1258.08	3.88906	intron	NM_015215	CAMTA1	A549
chr1	7676328	7677001	7676595	2215.67	4.0491	intron	NM_015215	CAMTA1	ECC-1
chr1	7676337	7676974	7676591	2941.48	3.92174	intron	NM_015215	CAMTA1	HL-60
chr1	7676340	7676849	7676598	1142.62	3.68797	intron	NM_015215	CAMTA1	PANC-1
chr1	7676381	7676928	7676587	1704.23	4.08618	intron	NM_015215	CAMTA1	MCF-7
chr1	7676403	7676800	7676587	2661.01	3.77151	intron	NM_015215	CAMTA1	PFSK-1
chr1	7676414	7676817	7676587	1995.26	3.58512	intron	NM_015215	CAMTA1	HCT-116
chr1	7676425	7676804	7676582	1269.23	3.59073	intron	NM_015215	CAMTA1	U87
chr1	7676441	7676770	7676592	1307.89	4.31237	intron	NM_015215	CAMTA1	SK-N-SH
chr1	7676450	7676751	7676594	3370.71	4.2441	intron	NM_015215	CAMTA1	H1 ESC
chr1	7676450	7676769	7676595	1824.59	3.65137	intron	NM_015215	CAMTA1	Hep G2
chr1	7676451	7676754	7676594	2293.42	3.55376	intron	NM_015215	CAMTA1	HeLa S3
chr1	7676453	7676763	7676593	4761.35	4.84183	intron	NM_015215	CAMTA1	K562
chr1	7676463	7676728	7676583	1184.42	3.70372	intron	NM_015215	CAMTA1	GM12878
chr1	7677059	7677383	7677221	45.4645	4.22383	intron	NM_015215	CAMTA1	T cell
chr1	7717564	7717839	7717734	135.367	4.37049	intron	NM_015215	CAMTA1	Neuron
chr1	7728651	7729097	7728901	274.713	4.37049	intron	NM_015215	CAMTA1	Neuron
chr1	7770841	7771341	7771091	56.2438	4.0491	intron	NM_015215	CAMTA1	ECC-1
chr1	7770860	7771364	7771112	77.3617	3.68797	intron	NM_015215	CAMTA1	PANC-1
chr1	7771022	7771238	7771130	46.0237	4.2441	intron	NM_015215	CAMTA1	H1 ESC
chr1	7771026	7771193	7771109	93.5514	3.92174	intron	NM_015215	CAMTA1	HL-60
chr1	7771047	7771135	7771106	102.481	2.8574	intron	NM_015215	CAMTA1	HeLa S3
chr1	7923939	7924443	7924191	77.9592	3.68797	distal	NM_021995	UTS2	PANC-1
chr1	7924095	7924311	7924203	78.3719	4.84183	distal	NM_021995	UTS2	K562
chr1	7924104	7924320	7924212	75.2292	4.2441	distal	NM_021995	UTS2	H1 ESC
chr1	7924110	7924294	7924202	90.7074	4.0491	distal	NM_021995	UTS2	ECC-1
chr1	8021489	8021689	8021597	60.6134	4.22383	prot	NM_001123377	PARK7	T cell
chr1	8051854	8052039	8051948	147.009	4.2441	distal	NM_001123377	PARK7	H1 ESC
chr1	8242478	8242749	8242621	118.331	3.88906	inter	none	NA	A549
chr1	8374432	8374554	8374514	86.036	4.37049	distal	NM_001080397	SLC45A1	Neuron
chr1	8377528	8378032	8377780	63.9316	3.68797	distal	NM_001080397	SLC45A1	PANC-1
chr1	8377683	8377899	8377791	48.7118	4.2441	distal	NM_001080397	SLC45A1	H1 ESC
chr1	8441943	8442443	8442193	57.4406	4.0491	intron	NM_012102	RERE	ECC-1
chr1	8470784	8471274	8471029	73.4931	4.37049	intron	NM_012102	RERE	Neuron
chr1	8585438	8585762	8585600	48.8452	4.22383	intron	NM_012102	RERE	T cell
chr1	8726435	8726756	8726586	326.889	4.37049	intron	NM_012102	RERE	Neuron
chr1	8766963	8767453	8767208	83.0554	4.37049	intron	NM_012102	RERE	Neuron
chr1	8772327	8772927	8772627	96.4108	3.88906	intron	NM_012102	RERE	A549
chr1	8772538	8772694	8772654	79.1294	4.37049	intron	NM_012102	RERE	Neuron
chr1	8787313	8787817	8787565	40.2568	2.04915	intron	NM_012102	RERE	PANC-1
chr1	8787390	8787766	8787578	26.9929	0.376178	intron	NM_012102	RERE	HCT-116
chr1	8877517	8877805	8877670	114.486	4.37049	prot	NM_012102	RERE	Neuron
chr1	8913171	8913387	8913279	45.6453	4.2441	distal	NR_038351	ENO1-AS1	H1 ESC
chr1	8938006	8938138	8938104	82.5265	4.31237	prot	NR_038351	ENO1-AS1	SK-N-SH
chr1	9188851	9188975	9188919	54.5266	4.22383	prot	NM_024980	GPR157	T cell
chr1	9285022	9285526	9285274	71.4951	3.68797	distal	NM_004285	H6PD	PANC-1
chr1	9285154	9285411	9285289	123.049	4.0491	distal	NM_004285	H6PD	ECC-1
chr1	9285175	9285391	9285283	98.9809	4.84183	distal	NM_004285	H6PD	K562
chr1	9285186	9285400	9285286	107.286	4.08618	distal	NM_004285	H6PD	MCF-7
chr1	9285194	9285385	9285287	207.161	2.97211	distal	NM_004285	H6PD	HeLa S3
chr1	9285198	9285426	9285283	170.626	3.92174	distal	NM_004285	H6PD	HL-60
chr1	9285212	9285361	9285285	131.583	4.2441	distal	NM_004285	H6PD	H1 ESC
chr1	9294744	9295068	9294906	50.2485	4.22383	prot	NM_004285	H6PD	T cell
chr1	9486690	9486828	9486750	88.4842	4.22383	inter	none	NA	T cell
chr1	9653533	9653893	9653713	81.0837	3.59073	intron	NM_001130924	TMEM201	U87
chr1	9653562	9653890	9653724	397.898	3.92174	intron	NM_001130924	TMEM201	HL-60
chr1	9653600	9653870	9653735	125.654	3.70372	intron	NM_001130924	TMEM201	GM12878
chr1	9653608	9653811	9653719	142.104	4.31237	intron	NM_001130924	TMEM201	SK-N-SH
chr1	9653611	9653871	9653741	95.5254	3.65137	intron	NM_001130924	TMEM201	Hep G2
chr1	9653612	9653840	9653726	497.592	4.84183	intron	NM_001130924	TMEM201	K562
chr1	9653619	9653834	9653731	194.357	3.77151	intron	NM_001130924	TMEM201	PFSK-1
chr1	9653661	9653756	9653701	96.4599	4.2441	intron	NM_001130924	TMEM201	H1 ESC
chr1	9653663	9653802	9653730	91.4324	4.0491	intron	NM_001130924	TMEM201	ECC-1
chr1	9687050	9687410	9687230	61.6417	2.93258	distal	NM_005026	PIK3CD	U87
chr1	10003322	10003670	10003505	189.872	4.22383	prot	NM_022787	NMNAT1	T cell
chr1	10269983	10270202	10270087	108.675	4.37049	prot	NM_015074	KIF1B	Neuron
chr1	10447521	10448121	10447821	103.714	3.88906	distal	NM_002631	PGD	A549
chr1	10490356	10490518	10490427	82.9853	4.22383	prot	NM_001270517|NM_199294	APITD1-CORT|APITD1	T cell
chr1	10708893	10709386	10709154	2096.66	3.92174	exon	NM_001079843	CASZ1	HL-60
chr1	10708947	10709338	10709154	525.675	4.0491	exon	NM_001079843	CASZ1	ECC-1
chr1	10708992	10709302	10709143	209.813	3.68797	exon	NM_001079843	CASZ1	PANC-1
chr1	10708999	10709305	10709155	122.329	3.88906	exon	NM_001079843	CASZ1	A549
chr1	10709001	10709312	10709156	3181.06	4.84183	exon	NM_001079843	CASZ1	K562
chr1	10709021	10709281	10709151	71.5424	2.9682	exon	NM_001079843	CASZ1	Hep G2
chr1	10709028	10709283	10709153	728.877	4.2441	exon	NM_001079843	CASZ1	H1 ESC
chr1	10709039	10709309	10709174	124.274	3.70372	exon	NM_001079843	CASZ1	GM12878
chr1	10709044	10709274	10709155	224.374	4.31237	exon	NM_001079843	CASZ1	SK-N-SH
chr1	10709052	10709259	10709154	132.376	3.59073	exon	NM_001079843	CASZ1	U87
chr1	10709073	10709247	10709151	94.7093	3.77151	exon	NM_001079843	CASZ1	PFSK-1
chr1	10808542	10808758	10808650	42.5003	4.2441	intron	NM_001079843	CASZ1	H1 ESC
chr1	10854068	10854284	10854176	47.6633	4.2441	intron	NM_001079843	CASZ1	H1 ESC
chr1	10876742	10877246	10876994	73.1409	3.68797	distal	NM_001079843	CASZ1	PANC-1
chr1	10876887	10877118	10876994	93.1596	4.0491	distal	NM_001079843	CASZ1	ECC-1
chr1	10876894	10877072	10876980	247.143	4.2441	distal	NM_001079843	CASZ1	H1 ESC
chr1	11072588	11073078	11072833	79.9498	4.37049	prot	NM_007375	TARDBP	Neuron
chr1	11113781	11114294	11114058	1259.8	4.0491	distal	NM_003132	SRM	ECC-1
chr1	11113808	11114297	11114061	1750.67	3.92174	distal	NM_003132	SRM	HL-60
chr1	11113827	11114303	11114062	431.177	3.88906	distal	NM_003132	SRM	A549
chr1	11113850	11114267	11114060	602.429	3.68797	distal	NM_003132	SRM	PANC-1
chr1	11113869	11114231	11114056	909.236	3.77151	distal	NM_003132	SRM	PFSK-1
chr1	11113874	11114263	11114060	849.029	4.08618	distal	NM_003132	SRM	MCF-7
chr1	11113886	11114248	11114043	611.663	4.22383	distal	NM_003132	SRM	T cell
chr1	11113892	11114225	11114064	417.231	3.59073	distal	NM_003132	SRM	U87
chr1	11113902	11114220	11114066	652.582	4.31237	distal	NM_003132	SRM	SK-N-SH
chr1	11113905	11114212	11114061	358.549	3.58512	distal	NM_003132	SRM	HCT-116
chr1	11113906	11114227	11114062	3573.96	4.84183	distal	NM_003132	SRM	K562
chr1	11113912	11114207	11114057	1433.32	3.65137	distal	NM_003132	SRM	Hep G2
chr1	11113913	11114202	11114061	2013.02	4.2441	distal	NM_003132	SRM	H1 ESC
chr1	11113917	11114192	11114057	1154.7	3.70372	distal	NM_003132	SRM	GM12878
chr1	11113937	11114197	11114064	935.101	3.55376	distal	NM_003132	SRM	HeLa S3
chr1	11159931	11160181	11160077	139.687	4.37049	prot	NM_001001998	EXOSC10	Neuron
chr1	11159992	11160208	11160100	85.9606	4.2441	prot	NM_001001998	EXOSC10	H1 ESC
chr1	11160004	11160158	11160077	159.416	4.84183	prot	NM_001001998	EXOSC10	K562
chr1	11254437	11254908	11254674	781.26	4.0491	exon	NM_021146	ANGPTL7	ECC-1
chr1	11254477	11254837	11254657	71.5786	3.59073	exon	NM_021146	ANGPTL7	U87
chr1	11254483	11254818	11254655	396.359	4.08618	exon	NM_021146	ANGPTL7	MCF-7
chr1	11254483	11254827	11254655	92.9334	3.77151	exon	NM_021146	ANGPTL7	PFSK-1
chr1	11254497	11254842	11254675	382.542	3.92174	exon	NM_021146	ANGPTL7	HL-60
chr1	11254536	11254806	11254671	120.026	3.70372	exon	NM_021146	ANGPTL7	GM12878
chr1	11254537	11254771	11254654	123.057	3.88906	exon	NM_021146	ANGPTL7	A549
chr1	11254537	11254805	11254673	365.744	4.31237	exon	NM_021146	ANGPTL7	SK-N-SH
chr1	11254542	11254794	11254667	623.14	4.84183	exon	NM_021146	ANGPTL7	K562
chr1	11254553	11254775	11254673	313.072	4.2441	exon	NM_021146	ANGPTL7	H1 ESC
chr1	11254554	11254763	11254659	223.831	2.95357	exon	NM_021146	ANGPTL7	HeLa S3
chr1	11254569	11254712	11254661	133.506	3.65137	exon	NM_021146	ANGPTL7	Hep G2
chr1	11254570	11254763	11254666	123.095	3.58512	exon	NM_021146	ANGPTL7	HCT-116
chr1	11254581	11254832	11254669	168.383	3.68797	exon	NM_021146	ANGPTL7	PANC-1
chr1	11333093	11333609	11333351	84.509	3.92174	prot	NM_013319	UBIAD1	HL-60
chr1	11333291	11333430	11333354	89.7061	4.37049	prot	NM_013319	UBIAD1	Neuron
chr1	11355225	11355426	11355319	106.138	4.22383	distal	NM_013319	UBIAD1	T cell
chr1	11355310	11355387	11355361	85.2813	4.2441	distal	NM_013319	UBIAD1	H1 ESC
chr1	11533649	11534125	11533884	2088.78	3.92174	distal	NM_020780	PTCHD2	HL-60
chr1	11533651	11534156	11533889	2201.13	4.0491	distal	NM_020780	PTCHD2	ECC-1
chr1	11533656	11534110	11533884	478.918	3.88906	distal	NM_020780	PTCHD2	A549
chr1	11533672	11534260	11533876	2028.19	4.22383	distal	NM_020780	PTCHD2	T cell
chr1	11533677	11534125	11533885	581.331	3.68797	distal	NM_020780	PTCHD2	PANC-1
chr1	11533686	11534108	11533887	1295.97	4.08618	distal	NM_020780	PTCHD2	MCF-7
chr1	11533688	11534077	11533881	2158.63	3.77151	distal	NM_020780	PTCHD2	PFSK-1
chr1	11533709	11534079	11533890	1388.71	3.58512	distal	NM_020780	PTCHD2	HCT-116
chr1	11533725	11534033	11533891	3830.29	4.84183	distal	NM_020780	PTCHD2	K562
chr1	11533730	11534022	11533881	525.612	3.59073	distal	NM_020780	PTCHD2	U87
chr1	11533734	11534023	11533883	889.159	4.31237	distal	NM_020780	PTCHD2	SK-N-SH
chr1	11533738	11534022	11533881	1799.5	3.65137	distal	NM_020780	PTCHD2	Hep G2
chr1	11533739	11534034	11533895	3403.28	4.2441	distal	NM_020780	PTCHD2	H1 ESC
chr1	11533742	11534023	11533889	1346.04	3.55376	distal	NM_020780	PTCHD2	HeLa S3
chr1	11533763	11534001	11533881	1025.18	3.70372	distal	NM_020780	PTCHD2	GM12878
chr1	11538681	11539948	11538913	310.902	4.22383	prot	NM_020780	PTCHD2	T cell
chr1	11538901	11538970	11538925	115.656	3.65137	prot	NM_020780	PTCHD2	Hep G2
chr1	11538954	11539470	11539212	110.24	3.92174	prot	NM_020780	PTCHD2	HL-60
chr1	11539133	11539335	11539240	94.0878	4.37049	prot	NM_020780	PTCHD2	Neuron
chr1	11539153	11539334	11539228	47.4933	3.37395	prot	NM_020780	PTCHD2	PFSK-1
chr1	11539870	11540723	11540325	9145.82	4.22383	prot	NM_020780	PTCHD2	T cell
chr1	11539959	11540622	11540326	2239.96	4.0491	prot	NM_020780	PTCHD2	ECC-1
chr1	11540017	11540615	11540329	2877.12	3.92174	prot	NM_020780	PTCHD2	HL-60
chr1	11540058	11540686	11540325	4667.21	3.77151	prot	NM_020780	PTCHD2	PFSK-1
chr1	11540069	11540588	11540313	469.154	3.88906	prot	NM_020780	PTCHD2	A549
chr1	11540112	11540511	11540329	423.075	3.68797	prot	NM_020780	PTCHD2	PANC-1
chr1	11540146	11540479	11540328	4121.3	4.84183	prot	NM_020780	PTCHD2	K562
chr1	11540147	11540485	11540328	1205.47	4.31237	prot	NM_020780	PTCHD2	SK-N-SH
chr1	11540151	11540493	11540328	238.629	4.08618	prot	NM_020780	PTCHD2	MCF-7
chr1	11540157	11540496	11540332	585.653	3.59073	prot	NM_020780	PTCHD2	U87
chr1	11540161	11540486	11540327	591.062	3.58512	prot	NM_020780	PTCHD2	HCT-116
chr1	11540168	11540514	11540314	3115.37	3.65137	prot	NM_020780	PTCHD2	Hep G2
chr1	11540181	11540460	11540325	1403.38	4.2441	prot	NM_020780	PTCHD2	H1 ESC
chr1	11540190	11540445	11540314	929.448	3.70372	prot	NM_020780	PTCHD2	GM12878
chr1	11540233	11540425	11540333	152.449	2.8835	prot	NM_020780	PTCHD2	HeLa S3
chr1	11540240	11540405	11540320	92.8641	4.37049	prot	NM_020780	PTCHD2	Neuron
chr1	11541174	11541390	11541282	40.3907	4.2441	intron	NM_020780	PTCHD2	H1 ESC
chr1	11555725	11555965	11555845	84.8287	2.81127	intron	NM_020780	PTCHD2	HeLa S3
chr1	11555734	11555965	11555837	85.8091	4.0491	intron	NM_020780	PTCHD2	ECC-1
chr1	11555822	11555880	11555827	96.3933	4.2441	intron	NM_020780	PTCHD2	H1 ESC
chr1	11585690	11585906	11585798	38.7505	4.2441	intron	NM_020780	PTCHD2	H1 ESC
chr1	11610486	11611219	11610933	4474.9	3.92174	distal	NM_020780	PTCHD2	HL-60
chr1	11610503	11611220	11610916	1914.09	3.88906	distal	NM_020780	PTCHD2	A549
chr1	11610510	11611158	11610921	7489.65	3.77151	distal	NM_020780	PTCHD2	PFSK-1
chr1	11610531	11611329	11610933	1797.25	3.68797	distal	NM_020780	PTCHD2	PANC-1
chr1	11610563	11611273	11610922	5455.73	4.0491	distal	NM_020780	PTCHD2	ECC-1
chr1	11610569	11611239	11610922	2580.39	4.22383	distal	NM_020780	PTCHD2	T cell
chr1	11610628	11611197	11610917	3023.9	4.08618	distal	NM_020780	PTCHD2	MCF-7
chr1	11610660	11611130	11610927	3509.09	3.58512	distal	NM_020780	PTCHD2	HCT-116
chr1	11610697	11611143	11610918	13705.4	4.84183	distal	NM_020780	PTCHD2	K562
chr1	11610703	11611096	11610907	2482.39	3.59073	distal	NM_020780	PTCHD2	U87
chr1	11610719	11611087	11610903	3649.31	3.65137	distal	NM_020780	PTCHD2	Hep G2
chr1	11610723	11611109	11610935	2560.4	4.31237	distal	NM_020780	PTCHD2	SK-N-SH
chr1	11610724	11611147	11610922	7753.21	4.2441	distal	NM_020780	PTCHD2	H1 ESC
chr1	11610731	11611095	11610922	4951.44	3.55376	distal	NM_020780	PTCHD2	HeLa S3
chr1	11610750	11611056	11610906	1482.07	3.70372	distal	NM_020780	PTCHD2	GM12878
chr1	11610781	11611072	11610918	152.291	4.37049	distal	NM_020780	PTCHD2	Neuron
chr1	11695867	11696389	11696090	781.789	3.88906	distal	NM_183412	FBXO44	A549
chr1	11695872	11696524	11696071	2994.76	4.0491	distal	NM_183412	FBXO44	ECC-1
chr1	11695876	11696478	11696070	2943.35	3.92174	distal	NM_183412	FBXO44	HL-60
chr1	11695890	11696303	11696070	1951.17	4.08618	distal	NM_183412	FBXO44	MCF-7
chr1	11695892	11696421	11696071	945.089	3.68797	distal	NM_183412	FBXO44	PANC-1
chr1	11695895	11696331	11696063	1426.85	4.22383	distal	NM_183412	FBXO44	T cell
chr1	11695902	11696295	11696067	4672.83	3.77151	distal	NM_183412	FBXO44	PFSK-1
chr1	11695916	11696263	11696084	1332.15	3.58512	distal	NM_183412	FBXO44	HCT-116
chr1	11695920	11696265	11696066	1771.82	3.59073	distal	NM_183412	FBXO44	U87
chr1	11695926	11696244	11696069	5867.67	4.84183	distal	NM_183412	FBXO44	K562
chr1	11695930	11696238	11696069	3612.68	3.65137	distal	NM_183412	FBXO44	Hep G2
chr1	11695932	11696226	11696063	3986.1	4.2441	distal	NM_183412	FBXO44	H1 ESC
chr1	11695938	11696253	11696070	1465.13	4.31237	distal	NM_183412	FBXO44	SK-N-SH
chr1	11695940	11696229	11696073	2342	3.55376	distal	NM_183412	FBXO44	HeLa S3
chr1	11695945	11696219	11696070	1777.97	3.70372	distal	NM_183412	FBXO44	GM12878
chr1	11698304	11698427	11698363	121	4.2441	distal	NM_183412	FBXO44	H1 ESC
chr1	11702548	11702764	11702656	40.2375	4.2441	distal	NM_183412	FBXO44	H1 ESC
chr1	11714320	11714580	11714450	62.7689	2.32428	prot	NM_183412	FBXO44	Hep G2
chr1	11795898	11796057	11795945	61.3207	4.22383	prot	NM_001040194	AGTRAP	T cell
chr1	11857767	11857963	11857867	168.892	4.84183	intron	NM_005957	MTHFR	K562
chr1	11858602	11858699	11858675	122.954	4.84183	intron	NM_005957	MTHFR	K562
chr1	11898744	11899088	11898916	53.3684	3.33358	prot	NR_037806	NPPA-AS1	PFSK-1
chr1	11902426	11902523	11902486	110.962	4.84183	exon	NR_046428	CLCN6	K562
chr1	11905502	11906158	11905779	1785.88	3.92174	exon	NR_037806|NM_006172	NPPA-AS1|NPPA	HL-60
chr1	11905525	11906213	11905775	1591.54	4.0491	exon	NR_037806|NM_006172	NPPA-AS1|NPPA	ECC-1
chr1	11905530	11906254	11905783	1550.07	4.22383	exon	NR_037806|NM_006172	NPPA-AS1|NPPA	T cell
chr1	11905531	11906068	11905773	548.393	3.88906	exon	NR_037806|NM_006172	NPPA-AS1|NPPA	A549
chr1	11905536	11906043	11905780	745.584	3.68797	exon	NR_037806|NM_006172	NPPA-AS1|NPPA	PANC-1
chr1	11905536	11906067	11905985	42.4267	2.22229	exon	NR_037806|NM_006172	NPPA-AS1|NPPA	PANC-1
chr1	11905582	11906015	11905776	706.162	4.08618	exon	NR_037806|NM_006172	NPPA-AS1|NPPA	MCF-7
chr1	11905608	11905963	11905777	724.643	3.58512	exon	NR_037806|NM_006172	NPPA-AS1|NPPA	HCT-116
chr1	11905617	11906150	11905768	3359.35	4.84183	exon	NR_037806|NM_006172	NPPA-AS1|NPPA	K562
chr1	11905618	11906139	11905776	1019.78	3.77151	exon	NR_037806|NM_006172	NPPA-AS1|NPPA	PFSK-1
chr1	11905619	11905952	11905774	835.852	4.31237	exon	NR_037806|NM_006172	NPPA-AS1|NPPA	SK-N-SH
chr1	11905631	11905926	11905776	987.245	3.55376	exon	NR_037806|NM_006172	NPPA-AS1|NPPA	HeLa S3
chr1	11905643	11905912	11905779	181.551	3.59073	exon	NR_037806|NM_006172	NPPA-AS1|NPPA	U87
chr1	11905644	11905930	11905772	1938.9	4.2441	exon	NR_037806|NM_006172	NPPA-AS1|NPPA	H1 ESC
chr1	11905647	11905901	11905766	392.379	3.65137	exon	NR_037806|NM_006172	NPPA-AS1|NPPA	Hep G2
chr1	11905672	11905843	11905766	310.394	3.70372	exon	NR_037806|NM_006172	NPPA-AS1|NPPA	GM12878
chr1	11908159	11908503	11908331	65.3531	3.77151	prot	NM_006172	NPPA	PFSK-1
chr1	11919160	11919958	11919532	12192.1	4.22383	prot	NM_002521	NPPB	T cell
chr1	11919220	11919896	11919526	6519.54	3.92174	prot	NM_002521	NPPB	HL-60
chr1	11919221	11919951	11919535	4439.83	4.0491	prot	NM_002521	NPPB	ECC-1
chr1	11919239	11919880	11919533	1360.08	3.88906	prot	NM_002521	NPPB	A549
chr1	11919277	11919793	11919530	2824.48	4.08618	prot	NM_002521	NPPB	MCF-7
chr1	11919299	11919808	11919533	995.274	3.68797	prot	NM_002521	NPPB	PANC-1
chr1	11919311	11919746	11919528	3486.09	3.77151	prot	NM_002521	NPPB	PFSK-1
chr1	11919325	11919739	11919522	2611.54	3.59073	prot	NM_002521	NPPB	U87
chr1	11919335	11919707	11919518	10615.6	3.65137	prot	NM_002521	NPPB	Hep G2
chr1	11919352	11919751	11919534	2530.05	3.58512	prot	NM_002521	NPPB	HCT-116
chr1	11919363	11919733	11919531	14563.5	4.84183	prot	NM_002521	NPPB	K562
chr1	11919366	11919678	11919519	5541.31	3.70372	prot	NM_002521	NPPB	GM12878
chr1	11919367	11919725	11919532	3156.8	4.31237	prot	NM_002521	NPPB	SK-N-SH
chr1	11919383	11919697	11919530	2602.5	3.55376	prot	NM_002521	NPPB	HeLa S3
chr1	11919386	11919708	11919541	4358.29	4.2441	prot	NM_002521	NPPB	H1 ESC
chr1	11919420	11919628	11919533	112.694	4.37049	prot	NM_002521	NPPB	Neuron
chr1	11942989	11943173	11943082	140.187	4.84183	distal	NM_002521	NPPB	K562
chr1	11954009	11954353	11954181	53.4451	3.33277	distal	NM_138346	KIAA2013	PFSK-1
chr1	11954040	11954300	11954170	62.7676	2.32446	distal	NM_138346	KIAA2013	Hep G2
chr1	11954067	11954283	11954175	61.3357	4.2441	distal	NM_138346	KIAA2013	H1 ESC
chr1	11958677	11959402	11959113	2095.08	4.0491	distal	NM_138346	KIAA2013	ECC-1
chr1	11958707	11959397	11959103	1643.06	3.92174	distal	NM_138346	KIAA2013	HL-60
chr1	11958746	11959434	11959101	1662.67	4.22383	distal	NM_138346	KIAA2013	T cell
chr1	11958856	11959361	11959100	420.141	3.88906	distal	NM_138346	KIAA2013	A549
chr1	11958924	11959312	11959131	298.419	3.68797	distal	NM_138346	KIAA2013	PANC-1
chr1	11958933	11959277	11959102	293.545	4.08618	distal	NM_138346	KIAA2013	MCF-7
chr1	11958951	11959253	11959110	236.852	3.59073	distal	NM_138346	KIAA2013	U87
chr1	11958954	11959268	11959111	3816.68	4.84183	distal	NM_138346	KIAA2013	K562
chr1	11958961	11959266	11959110	2255.85	3.65137	distal	NM_138346	KIAA2013	Hep G2
chr1	11958966	11959260	11959113	307.121	3.77151	distal	NM_138346	KIAA2013	PFSK-1
chr1	11958972	11959261	11959117	2517.59	4.2441	distal	NM_138346	KIAA2013	H1 ESC
chr1	11958982	11959244	11959113	212.199	4.31237	distal	NM_138346	KIAA2013	SK-N-SH
chr1	11958983	11959226	11959111	573.511	3.70372	distal	NM_138346	KIAA2013	GM12878
chr1	11959028	11959210	11959115	137.889	2.90487	distal	NM_138346	KIAA2013	HeLa S3
chr1	11959081	11959585	11959333	47.3893	2.71986	distal	NM_138346	KIAA2013	PANC-1
chr1	11965629	11965953	11965791	37.4038	4.22383	distal	NM_138346	KIAA2013	T cell
chr1	11968162	11968476	11968322	140.366	3.88906	distal	NM_138346	KIAA2013	A549
chr1	11968851	11969077	11968943	76.0367	4.37049	distal	NM_138346	KIAA2013	Neuron
chr1	11969649	11969865	11969757	103.29	4.84183	distal	NM_138346	KIAA2013	K562
chr1	11969807	11969986	11969921	105.907	3.88906	distal	NM_138346	KIAA2013	A549
chr1	11986372	11986696	11986534	35.8225	4.22383	prot	NM_138346	KIAA2013	T cell
chr1	12040300	12040790	12040545	88.7246	4.37049	prot	NM_001127660	MFN2	Neuron
chr1	12043608	12043824	12043716	100.696	4.84183	intron	NM_001127660	MFN2	K562
chr1	12074123	12074339	12074231	56.7415	4.2441	prot	NM_021933	MIIP	H1 ESC
chr1	12135845	12136061	12135953	92.7313	4.84183	intron	NM_001243	TNFRSF8	K562
chr1	12233846	12233927	12233897	37.0714	4.22383	intron	NM_001066	TNFRSF1B	T cell
chr1	12235372	12235434	12235388	97.9313	4.84183	intron	NM_001066	TNFRSF1B	K562
chr1	12278685	12278891	12278787	212.908	4.84183	distal	NM_018156	VPS13D	K562
chr1	12508830	12509159	12509047	259.794	4.84183	intron	NM_018156	VPS13D	K562
chr1	12589454	12589646	12589549	226.901	4.84183	distal	NR_003022|NR_003025	SNORA59B|SNORA59A	K562
chr1	12601664	12601772	12601684	102.782	4.84183	distal	NR_003022|NR_003025	SNORA59B|SNORA59A	K562
chr1	12656625	12656724	12656692	70.7842	4.31237	intron	NM_004753	DHRS3	SK-N-SH
chr1	12664495	12664711	12664603	99.3739	4.84183	intron	NM_004753	DHRS3	K562
chr1	12679080	12679134	12679120	78.5828	4.84183	prot	NM_004753	DHRS3	K562
chr1	14075362	14075573	14075469	106.013	4.22383	intron	NM_001135610	PRDM2	T cell
chr1	14353486	14353976	14353731	85.6125	4.37049	inter	none	NA	Neuron
chr1	14731273	14731599	14731431	228.347	4.37049	inter	none	NA	Neuron
chr1	14763498	14763738	14763618	342.189	4.84183	inter	none	NA	K562
chr1	14816486	14816702	14816594	83.4204	4.84183	inter	none	NA	K562
chr1	14816502	14816718	14816610	58.7841	4.2441	inter	none	NA	H1 ESC
chr1	14925100	14925404	14925255	74.2437	4.37049	prot	NM_201628	KAZN	Neuron
chr1	14952463	14952953	14952708	77.9163	4.37049	intron	NM_201628	KAZN	Neuron
chr1	14988642	14988784	14988702	133.536	4.84183	intron	NM_201628	KAZN	K562
chr1	14988668	14988750	14988708	111.503	4.2441	intron	NM_201628	KAZN	H1 ESC
chr1	14995279	14995506	14995354	85.0148	4.37049	intron	NM_201628	KAZN	Neuron
chr1	15109757	15109973	15109865	77.6534	4.84183	intron	NM_201628	KAZN	K562
chr1	15110595	15110811	15110703	90.3511	4.84183	intron	NM_201628	KAZN	K562
chr1	15193662	15194178	15193920	107.769	3.92174	intron	NM_201628	KAZN	HL-60
chr1	15193666	15194170	15193918	79.3806	3.68797	intron	NM_201628	KAZN	PANC-1
chr1	15193679	15194175	15193924	1033.35	4.0491	intron	NM_201628	KAZN	ECC-1
chr1	15193741	15194117	15193929	30.3829	0.558629	intron	NM_201628	KAZN	HCT-116
chr1	15193786	15194026	15193906	73.3061	2.71	intron	NM_201628	KAZN	HeLa S3
chr1	15193790	15194049	15193917	938.62	4.2441	intron	NM_201628	KAZN	H1 ESC
chr1	15193792	15194062	15193927	81.3959	3.24855	intron	NM_201628	KAZN	GM12878
chr1	15193792	15194071	15193934	151.445	4.08618	intron	NM_201628	KAZN	MCF-7
chr1	15193797	15194057	15193927	83.6776	3.65137	intron	NM_201628	KAZN	Hep G2
chr1	15193813	15194028	15193923	305.418	4.84183	intron	NM_201628	KAZN	K562
chr1	15193833	15194011	15193933	97.1346	3.77151	intron	NM_201628	KAZN	PFSK-1
chr1	15193848	15193953	15193903	96.3195	3.59073	intron	NM_201628	KAZN	U87
chr1	15193856	15193982	15193921	91.9882	4.31237	intron	NM_201628	KAZN	SK-N-SH
chr1	15352677	15352893	15352785	43.9614	4.2441	intron	NM_201628	KAZN	H1 ESC
chr1	15352713	15352879	15352801	92.8942	4.0491	intron	NM_201628	KAZN	ECC-1
chr1	15396595	15397099	15396847	54.2289	2.77305	intron	NM_201628	KAZN	PANC-1
chr1	15396751	15396950	15396861	142.665	3.59073	intron	NM_201628	KAZN	U87
chr1	15396763	15396966	15396866	368.545	4.2441	intron	NM_201628	KAZN	H1 ESC
chr1	15396774	15396938	15396862	153.931	4.84183	intron	NM_201628	KAZN	K562
chr1	15396783	15396920	15396868	128.648	2.81016	intron	NM_201628	KAZN	HeLa S3
chr1	15396783	15396992	15396879	87.1369	4.0491	intron	NM_201628	KAZN	ECC-1
chr1	15537260	15537476	15537368	53.0665	4.2441	intron	NM_001136216	TMEM51	H1 ESC
chr1	15615725	15616101	15615913	53.3783	1.83644	exon	NM_052929	FHAD1	HCT-116
chr1	15615781	15616065	15615931	122.471	4.0491	exon	NM_052929	FHAD1	ECC-1
chr1	15615813	15616073	15615943	75.1267	2.96047	exon	NM_052929	FHAD1	Hep G2
chr1	15615837	15616012	15615924	168.777	4.84183	exon	NM_052929	FHAD1	K562
chr1	15615878	15615993	15615924	79.2023	4.31237	exon	NM_052929	FHAD1	SK-N-SH
chr1	15615886	15615950	15615939	85.6611	4.2441	exon	NM_052929	FHAD1	H1 ESC
chr1	15615902	15616001	15615939	95.2791	3.59073	exon	NM_052929	FHAD1	U87
chr1	16053456	16053972	16053714	93.3468	3.92174	exon	NM_015164	PLEKHM2	HL-60
chr1	16053471	16053975	16053723	94.524	3.68797	exon	NM_015164	PLEKHM2	PANC-1
chr1	16053559	16053861	16053703	193.314	4.0491	exon	NM_015164	PLEKHM2	ECC-1
chr1	16053563	16053823	16053693	49.2924	1.50136	exon	NM_015164	PLEKHM2	Hep G2
chr1	16053608	16053819	16053712	271.184	4.2441	exon	NM_015164	PLEKHM2	H1 ESC
chr1	16053611	16053805	16053716	210.569	4.84183	exon	NM_015164	PLEKHM2	K562
chr1	16121729	16121876	16121776	115.901	4.84183	distal	NM_001089591	UQCRHL	K562
chr1	16160885	16161407	16161240	106.362	4.37049	exon	NR_024279	FLJ37453	Neuron
chr1	16175683	16176514	16176164	319.795	4.37049	prot	NR_024279	FLJ37453	Neuron
chr1	16176054	16176158	16176100	79.8059	4.84183	prot	NR_024279	FLJ37453	K562
chr1	16279411	16279523	16279469	135.176	4.84183	intron	NM_003443	ZBTB17	K562
chr1	16282432	16282574	16282499	91.8861	4.31237	intron	NM_003443	ZBTB17	SK-N-SH
chr1	16308110	16308614	16308362	55.6857	2.87597	distal	NM_003443	ZBTB17	PANC-1
chr1	16308262	16308478	16308370	80.2852	4.2441	distal	NM_003443	ZBTB17	H1 ESC
chr1	16308262	16308520	16308379	109.501	4.0491	distal	NM_003443	ZBTB17	ECC-1
chr1	16467497	16467551	16467549	97.8343	4.84183	intron	NM_004431	EPHA2	K562
chr1	16470422	16470638	16470530	85.4734	4.84183	intron	NM_004431	EPHA2	K562
chr1	16511216	16511390	16511316	83.4738	4.08618	distal	NM_153213	ARHGEF19	MCF-7
chr1	16678703	16678961	16678788	101.255	4.37049	prot	NM_018994	FBXO42	Neuron
chr1	16718968	16719184	16719076	53.2223	4.2441	intron	NR_073503	SZRD1	H1 ESC
chr1	16861588	16861932	16861760	52.351	3.34064	distal	NR_037446	MIR3675	PFSK-1
chr1	16872337	16872567	16872415	143.967	3.88906	prot	NR_037446	MIR3675	A549
chr1	16875004	16875348	16875176	57.0335	3.31126	prot	NR_037446	MIR3675	PFSK-1
chr1	16939893	16940493	16940193	93.9576	3.88906	prot	NM_017940	NBPF1	A549
chr1	16939936	16940426	16940181	131.066	4.37049	prot	NM_017940	NBPF1	Neuron
chr1	16948363	16948486	16948421	60.5095	4.22383	intron	NR_026752	CROCCP2	T cell
chr1	16959553	16960053	16959803	61.3517	4.0491	prot	NR_026752	CROCCP2	ECC-1
chr1	16970216	16970482	16970357	256.591	4.84183	prot	NR_027504	MST1P2	K562
chr1	16970223	16970412	16970343	81.6035	4.22383	prot	NR_027504	MST1P2	T cell
chr1	16971000	16971473	16971202	242.981	4.22383	prot	NR_027504	MST1P2	T cell
chr1	16971010	16971506	16971238	138.197	3.88906	prot	NR_027504	MST1P2	A549
chr1	16971134	16971288	16971213	107.813	4.31237	prot	NR_027504	MST1P2	SK-N-SH
chr1	16993029	16993615	16993398	129.105	3.88906	distal	NR_037446	MIR3675	A549
chr1	16993222	16993546	16993409	198.984	4.31237	distal	NR_037446	MIR3675	SK-N-SH
chr1	16993253	16993523	16993388	90.6362	3.70372	distal	NR_037446	MIR3675	GM12878
chr1	16993719	16993999	16993859	85.1259	4.31237	distal	NR_037446	MIR3675	SK-N-SH
chr1	17007363	17007707	17007535	50.1947	3.35507	prot	NR_037446	MIR3675	PFSK-1
chr1	17066814	17067385	17067147	271.434	3.88906	distal	NR_026567	ESPNP	A549
chr1	17066814	17067387	17067347	116.696	3.88906	distal	NR_026567	ESPNP	A549
chr1	17066930	17067200	17067065	90.662	3.70372	distal	NR_026567	ESPNP	GM12878
chr1	17066944	17067317	17067146	213.328	4.31237	distal	NR_026567	ESPNP	SK-N-SH
chr1	17185587	17185931	17185759	65.1953	3.77151	prot	NR_037446	MIR3675	PFSK-1
chr1	17199020	17199364	17199192	59.3742	3.29761	distal	NR_037446	MIR3675	PFSK-1
chr1	17199713	17199794	17199773	40.7692	4.22383	distal	NR_037446	MIR3675	T cell
chr1	17222345	17222909	17222600	380.013	3.88906	distal	NM_014675	CROCC	A549
chr1	17222345	17222942	17222802	193.558	3.88906	distal	NM_014675	CROCC	A549
chr1	17222394	17222664	17222529	89.1261	3.70372	distal	NM_014675	CROCC	GM12878
chr1	17222407	17222787	17222598	312.474	4.31237	distal	NM_014675	CROCC	SK-N-SH
chr1	17222943	17223052	17222954	107.54	4.84183	distal	NM_014675	CROCC	K562
chr1	17231564	17231898	17231724	154.538	3.88906	distal	NM_014675	CROCC	A549
chr1	17231645	17231774	17231714	115.994	4.31237	distal	NM_014675	CROCC	SK-N-SH
chr1	17231685	17231742	17231736	77.2713	4.84183	distal	NM_014675	CROCC	K562
chr1	17240844	17241168	17241006	38.5533	4.22383	distal	NM_014675	CROCC	T cell
chr1	17287224	17287477	17287357	104.097	4.22383	exon	NM_014675	CROCC	T cell
chr1	17388351	17388841	17388596	84.2388	4.37049	distal	NM_003000	SDHB	Neuron
chr1	17510183	17510687	17510435	73.4052	3.68797	distal	NM_013358	PADI1	PANC-1
chr1	17510330	17510546	17510438	64.6667	4.2441	distal	NM_013358	PADI1	H1 ESC
chr1	17632809	17633325	17633067	95.8116	3.92174	prot	NM_012387	PADI4	HL-60
chr1	17632842	17633346	17633094	65.961	3.68797	prot	NM_012387	PADI4	PANC-1
chr1	17632979	17633221	17633077	104.205	4.0491	prot	NM_012387	PADI4	ECC-1
chr1	17632981	17633197	17633089	36.7388	4.2441	prot	NM_012387	PADI4	H1 ESC
chr1	17633053	17633156	17633092	101.742	4.84183	prot	NM_012387	PADI4	K562
chr1	17877768	17878272	17878020	57.5132	3.01528	intron	NM_018125	ARHGEF10L	PANC-1
chr1	17877902	17878112	17877996	82.8154	4.08618	intron	NM_018125	ARHGEF10L	MCF-7
chr1	17877909	17878109	17877995	139.789	4.31237	intron	NM_018125	ARHGEF10L	SK-N-SH
chr1	17959089	17959266	17959173	146.366	3.59073	intron	NM_018125	ARHGEF10L	U87
chr1	17959134	17959209	17959191	85.8868	4.2441	intron	NM_018125	ARHGEF10L	H1 ESC
chr1	18158019	18158565	18158280	1778	4.0491	distal	NM_030812	ACTL8	ECC-1
chr1	18158039	18158517	18158283	577.337	3.88906	distal	NM_030812	ACTL8	A549
chr1	18158047	18158550	18158281	1611.69	3.92174	distal	NM_030812	ACTL8	HL-60
chr1	18158064	18158489	18158273	1050.07	4.08618	distal	NM_030812	ACTL8	MCF-7
chr1	18158089	18158470	18158268	500.749	4.22383	distal	NM_030812	ACTL8	T cell
chr1	18158095	18158481	18158289	355.979	3.68797	distal	NM_030812	ACTL8	PANC-1
chr1	18158109	18158457	18158264	484.712	3.59073	distal	NM_030812	ACTL8	U87
chr1	18158117	18158452	18158271	844.966	3.58512	distal	NM_030812	ACTL8	HCT-116
chr1	18158122	18158435	18158289	1074.03	4.31237	distal	NM_030812	ACTL8	SK-N-SH
chr1	18158126	18158438	18158267	333.881	3.77151	distal	NM_030812	ACTL8	PFSK-1
chr1	18158131	18158430	18158285	3147.91	4.2441	distal	NM_030812	ACTL8	H1 ESC
chr1	18158135	18158431	18158277	3062.21	4.84183	distal	NM_030812	ACTL8	K562
chr1	18158138	18158415	18158279	1600.5	3.55376	distal	NM_030812	ACTL8	HeLa S3
chr1	18158144	18158411	18158269	614.932	3.65137	distal	NM_030812	ACTL8	Hep G2
chr1	18158172	18158369	18158269	480.754	3.70372	distal	NM_030812	ACTL8	GM12878
chr1	18167667	18167883	18167775	37.9831	4.2441	distal	NM_030812	ACTL8	H1 ESC
chr1	18184556	18184796	18184676	73.7958	2.70899	distal	NM_030812	ACTL8	HeLa S3
chr1	18184566	18184765	18184678	178.165	4.31237	distal	NM_030812	ACTL8	SK-N-SH
chr1	18184603	18184764	18184669	60.6249	4.0491	distal	NM_030812	ACTL8	ECC-1
chr1	18245872	18246558	18246121	1928.25	4.0491	inter	none	NA	ECC-1
chr1	18245900	18246404	18246128	901.611	3.88906	inter	none	NA	A549
chr1	18245900	18246628	18246330	166.672	3.88906	inter	none	NA	A549
chr1	18245904	18246402	18246124	1738.94	3.92174	inter	none	NA	HL-60
chr1	18245904	18246434	18246121	876.322	3.68797	inter	none	NA	PANC-1
chr1	18245904	18246474	18246330	70.7708	3.68797	inter	none	NA	PANC-1
chr1	18245921	18246404	18246125	1479.16	4.08618	inter	none	NA	MCF-7
chr1	18245949	18246335	18246125	1144.92	3.58512	inter	none	NA	HCT-116
chr1	18245950	18246305	18246120	1067.44	4.31237	inter	none	NA	SK-N-SH
chr1	18245960	18246298	18246131	338.219	4.22383	inter	none	NA	T cell
chr1	18245979	18246279	18246126	412.378	3.59073	inter	none	NA	U87
chr1	18245983	18246278	18246123	2787.67	4.2441	inter	none	NA	H1 ESC
chr1	18245984	18246274	18246126	253.133	3.77151	inter	none	NA	PFSK-1
chr1	18245985	18246272	18246113	1899.44	3.55376	inter	none	NA	HeLa S3
chr1	18245988	18246261	18246122	2491.16	4.84183	inter	none	NA	K562
chr1	18245991	18246246	18246116	702.969	3.65137	inter	none	NA	Hep G2
chr1	18246000	18246233	18246116	610.449	3.70372	inter	none	NA	GM12878
chr1	18246410	18246670	18246540	48.8188	1.48831	inter	none	NA	Hep G2
chr1	18246419	18246635	18246527	61.1826	4.2441	inter	none	NA	H1 ESC
chr1	18284167	18284383	18284275	36.6691	4.2441	inter	none	NA	H1 ESC
chr1	18337391	18337847	18337649	986.634	4.0491	inter	none	NA	ECC-1
chr1	18337411	18337771	18337591	66.3652	3.13407	inter	none	NA	U87
chr1	18337438	18337826	18337650	516.549	4.08618	inter	none	NA	MCF-7
chr1	18337452	18337806	18337651	223.54	3.68797	inter	none	NA	PANC-1
chr1	18337462	18337838	18337649	460.895	3.92174	inter	none	NA	HL-60
chr1	18337476	18337832	18337661	204.546	3.88906	inter	none	NA	A549
chr1	18337510	18337796	18337650	358.659	3.58512	inter	none	NA	HCT-116
chr1	18337517	18337776	18337646	918.373	4.2441	inter	none	NA	H1 ESC
chr1	18337536	18337796	18337666	47.1107	1.41283	inter	none	NA	Hep G2
chr1	18337540	18337757	18337652	426.297	4.84183	inter	none	NA	K562
chr1	18337540	18337772	18337658	305.898	3.10026	inter	none	NA	HeLa S3
chr1	18337541	18337652	18337645	60.9652	4.22383	inter	none	NA	T cell
chr1	18339135	18339639	18339387	81.8818	3.68797	inter	none	NA	PANC-1
chr1	18339228	18339543	18339388	246.628	4.08618	inter	none	NA	MCF-7
chr1	18339230	18339579	18339396	339.045	4.0491	inter	none	NA	ECC-1
chr1	18339262	18339522	18339392	56.8678	1.99495	inter	none	NA	Hep G2
chr1	18339289	18339512	18339401	388.404	4.2441	inter	none	NA	H1 ESC
chr1	18339302	18339473	18339392	151.676	4.84183	inter	none	NA	K562
chr1	18339306	18339489	18339394	109.865	3.58512	inter	none	NA	HCT-116
chr1	18339308	18339500	18339399	242.253	3.15726	inter	none	NA	HeLa S3
chr1	18339310	18339518	18339405	115.895	3.92174	inter	none	NA	HL-60
chr1	18339331	18339421	18339406	62.2182	3.15096	inter	none	NA	U87
chr1	18388670	18389067	18388877	444.458	3.92174	distal	NM_032880	IGSF21	HL-60
chr1	18388671	18389063	18388879	369.616	4.0491	distal	NM_032880	IGSF21	ECC-1
chr1	18388686	18389036	18388869	155.981	3.88906	distal	NM_032880	IGSF21	A549
chr1	18388692	18389047	18388858	211.012	3.68797	distal	NM_032880	IGSF21	PANC-1
chr1	18388705	18389048	18388882	254.199	4.08618	distal	NM_032880	IGSF21	MCF-7
chr1	18388711	18389034	18388878	372.367	3.58512	distal	NM_032880	IGSF21	HCT-116
chr1	18388736	18389006	18388871	241.44	3.70372	distal	NM_032880	IGSF21	GM12878
chr1	18388736	18389006	18388874	142.275	3.77151	distal	NM_032880	IGSF21	PFSK-1
chr1	18388741	18389018	18388890	1484.41	4.2441	distal	NM_032880	IGSF21	H1 ESC
chr1	18388745	18389033	18388900	347.629	4.22383	distal	NM_032880	IGSF21	T cell
chr1	18388747	18389008	18388877	695.894	4.84183	distal	NM_032880	IGSF21	K562
chr1	18388756	18389005	18388883	336.895	3.65137	distal	NM_032880	IGSF21	Hep G2
chr1	18388772	18388962	18388886	75.9576	3.59073	distal	NM_032880	IGSF21	U87
chr1	18388775	18388986	18388879	178.985	2.9987	distal	NM_032880	IGSF21	HeLa S3
chr1	18396462	18396725	18396607	161.053	4.22383	distal	NM_032880	IGSF21	T cell
chr1	18582691	18583242	18583002	2422.01	3.92174	intron	NM_032880	IGSF21	HL-60
chr1	18582714	18583302	18583004	1980.4	4.0491	intron	NM_032880	IGSF21	ECC-1
chr1	18582756	18583223	18582993	1364.06	4.22383	intron	NM_032880	IGSF21	T cell
chr1	18582763	18583276	18583004	596.092	3.88906	intron	NM_032880	IGSF21	A549
chr1	18582777	18583241	18582992	690.799	3.68797	intron	NM_032880	IGSF21	PANC-1
chr1	18582789	18583207	18583003	1494.66	4.08618	intron	NM_032880	IGSF21	MCF-7
chr1	18582828	18583190	18583004	1193.89	3.58512	intron	NM_032880	IGSF21	HCT-116
chr1	18582837	18583153	18582989	4074.82	4.2441	intron	NM_032880	IGSF21	H1 ESC
chr1	18582841	18583199	18582998	808.722	3.59073	intron	NM_032880	IGSF21	U87
chr1	18582844	18583150	18582995	397.049	3.77151	intron	NM_032880	IGSF21	PFSK-1
chr1	18582849	18583159	18583001	2388.65	3.65137	intron	NM_032880	IGSF21	Hep G2
chr1	18582853	18583158	18582995	3013.09	4.84183	intron	NM_032880	IGSF21	K562
chr1	18582859	18583139	18583002	1325.03	3.55376	intron	NM_032880	IGSF21	HeLa S3
chr1	18582871	18583135	18583005	1275.16	3.70372	intron	NM_032880	IGSF21	GM12878
chr1	18582884	18583090	18582982	92.04	4.37049	intron	NM_032880	IGSF21	Neuron
chr1	18582911	18583051	18582980	74.1578	4.31237	intron	NM_032880	IGSF21	SK-N-SH
chr1	18590077	18590583	18590270	193.704	4.37049	intron	NM_032880	IGSF21	Neuron
chr1	18611367	18611569	18611451	110.846	4.37049	intron	NM_032880	IGSF21	Neuron
chr1	18646741	18646912	18646818	179.127	4.2441	intron	NM_032880	IGSF21	H1 ESC
chr1	18664327	18664557	18664448	111.134	4.0491	intron	NM_032880	IGSF21	ECC-1
chr1	18664377	18664509	18664437	144.734	4.2441	intron	NM_032880	IGSF21	H1 ESC
chr1	18664379	18664526	18664444	152.941	4.84183	intron	NM_032880	IGSF21	K562
chr1	18884119	18884609	18884364	75.1261	4.37049	inter	none	NA	Neuron
chr1	18923908	18924124	18924016	70.3057	4.2441	distal	NM_001135254	PAX7	H1 ESC
chr1	18979916	18980420	18980168	131.393	3.68797	intron	NM_001135254	PAX7	PANC-1
chr1	18980020	18980290	18980155	90.9232	3.70372	intron	NM_001135254	PAX7	GM12878
chr1	18980028	18980334	18980180	158.426	4.0491	intron	NM_001135254	PAX7	ECC-1
chr1	18980039	18980279	18980159	79.368	2.82719	intron	NM_001135254	PAX7	HeLa S3
chr1	18980041	18980273	18980154	97.4445	3.88906	intron	NM_001135254	PAX7	A549
chr1	18980044	18980328	18980170	236.422	3.92174	intron	NM_001135254	PAX7	HL-60
chr1	18980058	18980271	18980165	294.026	4.84183	intron	NM_001135254	PAX7	K562
chr1	18980068	18980291	18980169	415.698	4.2441	intron	NM_001135254	PAX7	H1 ESC
chr1	18980070	18980249	18980163	76.7257	4.08618	intron	NM_001135254	PAX7	MCF-7
chr1	18980096	18980207	18980151	71.2603	4.31237	intron	NM_001135254	PAX7	SK-N-SH
chr1	18980130	18980292	18980189	66.7465	4.22383	intron	NM_001135254	PAX7	T cell
chr1	19063303	19063519	19063411	37.4157	4.2441	intron	NM_001135254	PAX7	H1 ESC
chr1	19378949	19379273	19379100	192.676	4.37049	distal	NM_020765	UBR4	Neuron
chr1	19536543	19536782	19536690	105.727	4.37049	prot	NM_020765	UBR4	Neuron
chr1	19682956	19683217	19683074	120.883	4.0491	exon	NM_001206540	CAPZB	ECC-1
chr1	20002339	20002443	20002424	53.6837	4.22383	intron	NM_000871	HTR6	T cell
chr1	20002623	20003356	20003083	2940.11	4.0491	intron	NM_000871	HTR6	ECC-1
chr1	20002691	20003336	20003084	2365.08	3.92174	intron	NM_000871	HTR6	HL-60
chr1	20002692	20003467	20003095	2660.82	4.22383	intron	NM_000871	HTR6	T cell
chr1	20002806	20003348	20003077	871.338	3.88906	intron	NM_000871	HTR6	A549
chr1	20002820	20003348	20003087	967.161	3.68797	intron	NM_000871	HTR6	PANC-1
chr1	20002864	20003292	20003089	1196.3	4.08618	intron	NM_000871	HTR6	MCF-7
chr1	20002896	20003249	20003090	5744.71	4.84183	intron	NM_000871	HTR6	K562
chr1	20002903	20003251	20003086	1300.84	4.31237	intron	NM_000871	HTR6	SK-N-SH
chr1	20002910	20003251	20003087	1002.19	3.58512	intron	NM_000871	HTR6	HCT-116
chr1	20002919	20003311	20003123	2178.01	3.59073	intron	NM_000871	HTR6	U87
chr1	20002929	20003279	20003102	579.053	3.77151	intron	NM_000871	HTR6	PFSK-1
chr1	20002933	20003243	20003095	3535.64	4.2441	intron	NM_000871	HTR6	H1 ESC
chr1	20002943	20003236	20003089	1636.17	3.55376	intron	NM_000871	HTR6	HeLa S3
chr1	20002950	20003253	20003106	1222.59	3.65137	intron	NM_000871	HTR6	Hep G2
chr1	20002958	20003218	20003104	1043.34	3.70372	intron	NM_000871	HTR6	GM12878
chr1	20007148	20007543	20007340	370.377	4.0491	distal	NM_000871	HTR6	ECC-1
chr1	20007204	20007456	20007327	905.372	4.2441	distal	NM_000871	HTR6	H1 ESC
chr1	20007210	20007470	20007340	73.2392	2.96501	distal	NM_000871	HTR6	Hep G2
chr1	20007237	20007429	20007334	154.929	4.84183	distal	NM_000871	HTR6	K562
chr1	20135533	20135951	20135755	616.724	4.0491	distal	NM_019062	RNF186	ECC-1
chr1	20135555	20135879	20135717	35.5792	4.22383	distal	NM_019062	RNF186	T cell
chr1	20135594	20135761	20135714	103.9	3.59073	distal	NM_019062	RNF186	U87
chr1	20135607	20135894	20135744	200.291	3.92174	distal	NM_019062	RNF186	HL-60
chr1	20135608	20135862	20135741	310.683	4.31237	distal	NM_019062	RNF186	SK-N-SH
chr1	20135624	20135880	20135743	99.0755	4.08618	distal	NM_019062	RNF186	MCF-7
chr1	20135624	20135905	20135753	196.997	3.68797	distal	NM_019062	RNF186	PANC-1
chr1	20135628	20135863	20135744	601.37	4.84183	distal	NM_019062	RNF186	K562
chr1	20135629	20135873	20135754	817.045	4.2441	distal	NM_019062	RNF186	H1 ESC
chr1	20135630	20135866	20135754	450.164	3.55376	distal	NM_019062	RNF186	HeLa S3
chr1	20135634	20135824	20135716	74.4105	3.77151	distal	NM_019062	RNF186	PFSK-1
chr1	20135634	20135861	20135733	95.742	3.88906	distal	NM_019062	RNF186	A549
chr1	20135638	20135832	20135721	138.209	3.65137	distal	NM_019062	RNF186	Hep G2
chr1	20196604	20196726	20196667	162.641	4.84183	distal	NM_015207	OTUD3	K562
chr1	20605560	20605776	20605668	39.1559	4.2441	distal	NM_001039500	VWA5B1	H1 ESC
chr1	20612410	20612626	20612518	49.0816	4.2441	prot	NM_001039500	VWA5B1	H1 ESC
chr1	20651158	20651662	20651410	55.2672	2.76946	intron	NM_001039500	VWA5B1	PANC-1
chr1	20651223	20651599	20651411	32.713	0.691161	intron	NM_001039500	VWA5B1	HCT-116
chr1	20651281	20651519	20651409	124.264	4.0491	intron	NM_001039500	VWA5B1	ECC-1
chr1	20651281	20651541	20651411	52.908	1.74593	intron	NM_001039500	VWA5B1	Hep G2
chr1	20651289	20651533	20651410	706.727	4.2441	intron	NM_001039500	VWA5B1	H1 ESC
chr1	20651305	20651515	20651402	384.523	4.84183	intron	NM_001039500	VWA5B1	K562
chr1	20651309	20651525	20651409	214.273	2.96445	intron	NM_001039500	VWA5B1	HeLa S3
chr1	20685243	20685539	20685381	178.264	4.0491	distal	NM_001039500	VWA5B1	ECC-1
chr1	20685245	20685605	20685425	53.4806	2.82728	distal	NM_001039500	VWA5B1	U87
chr1	20685266	20685488	20685392	98.7149	4.08618	distal	NM_001039500	VWA5B1	MCF-7
chr1	20685272	20685484	20685371	157.043	4.31237	distal	NM_001039500	VWA5B1	SK-N-SH
chr1	20685275	20685491	20685383	58.5088	4.2441	distal	NM_001039500	VWA5B1	H1 ESC
chr1	20685284	20685544	20685414	79.5426	3.65137	distal	NM_001039500	VWA5B1	Hep G2
chr1	20685316	20685420	20685378	99.4343	3.58512	distal	NM_001039500	VWA5B1	HCT-116
chr1	20697735	20698334	20698116	1248.96	4.0491	intron	NR_033887	LOC339505	ECC-1
chr1	20697892	20698307	20698101	356.602	3.88906	intron	NR_033887	LOC339505	A549
chr1	20697898	20698312	20698117	861.879	3.92174	intron	NR_033887	LOC339505	HL-60
chr1	20697907	20698293	20698120	719.29	4.08618	intron	NR_033887	LOC339505	MCF-7
chr1	20697913	20698291	20698116	283.373	3.68797	intron	NR_033887	LOC339505	PANC-1
chr1	20697932	20698234	20698092	516.009	3.59073	intron	NR_033887	LOC339505	U87
chr1	20697949	20698266	20698120	631.346	3.58512	intron	NR_033887	LOC339505	HCT-116
chr1	20697957	20698242	20698120	674.893	4.31237	intron	NR_033887	LOC339505	SK-N-SH
chr1	20697964	20698231	20698094	236.841	3.77151	intron	NR_033887	LOC339505	PFSK-1
chr1	20697971	20698240	20698116	1531.43	4.84183	intron	NR_033887	LOC339505	K562
chr1	20697973	20698241	20698113	700.049	3.55376	intron	NR_033887	LOC339505	HeLa S3
chr1	20697975	20698241	20698113	2305.08	4.2441	intron	NR_033887	LOC339505	H1 ESC
chr1	20697976	20698241	20698108	841.536	3.65137	intron	NR_033887	LOC339505	Hep G2
chr1	20697992	20698207	20698106	440.083	3.70372	intron	NR_033887	LOC339505	GM12878
chr1	20765732	20766142	20765937	889.83	3.92174	distal	NR_033887	LOC339505	HL-60
chr1	20765740	20766138	20765949	351.07	3.88906	distal	NR_033887	LOC339505	A549
chr1	20765744	20766143	20765937	673.36	4.0491	distal	NR_033887	LOC339505	ECC-1
chr1	20765781	20766095	20765942	277.36	4.08618	distal	NR_033887	LOC339505	MCF-7
chr1	20765791	20766061	20765926	254.237	3.70372	distal	NR_033887	LOC339505	GM12878
chr1	20765803	20766078	20765933	279.811	3.58512	distal	NR_033887	LOC339505	HCT-116
chr1	20765805	20766033	20765925	198.991	3.59073	distal	NR_033887	LOC339505	U87
chr1	20765809	20766071	20765937	578.351	4.31237	distal	NR_033887	LOC339505	SK-N-SH
chr1	20765810	20766074	20765937	1627.33	4.2441	distal	NR_033887	LOC339505	H1 ESC
chr1	20765813	20766060	20765940	904.833	3.55376	distal	NR_033887	LOC339505	HeLa S3
chr1	20765816	20766059	20765941	1061.8	4.84183	distal	NR_033887	LOC339505	K562
chr1	20765817	20766047	20765929	308.101	3.65137	distal	NR_033887	LOC339505	Hep G2
chr1	20765817	20766069	20765937	219.914	4.22383	distal	NR_033887	LOC339505	T cell
chr1	20765821	20766098	20765936	221.194	3.68797	distal	NR_033887	LOC339505	PANC-1
chr1	20765835	20766034	20765937	93.2011	3.77151	distal	NR_033887	LOC339505	PFSK-1
chr1	20834238	20834498	20834368	57.2077	2.04861	prot	NM_024544	MUL1	Hep G2
chr1	20834248	20834464	20834356	48.6338	4.2441	prot	NM_024544	MUL1	H1 ESC
chr1	20834258	20834445	20834355	103.255	4.0491	prot	NM_024544	MUL1	ECC-1
chr1	20959796	20959936	20959897	77.8478	4.22383	prot	NM_032409	PINK1	T cell
chr1	20987896	20987977	20987940	35.09	4.22383	prot	NM_005216	DDOST	T cell
chr1	21223380	21223660	21223534	190.31	3.88906	intron	NM_001198802	EIF4G3	A549
chr1	21503152	21503397	21503303	96.7253	4.37049	prot	NM_001198802	EIF4G3	Neuron
chr1	21525470	21525643	21525572	85.1243	4.37049	distal	NM_001198802	EIF4G3	Neuron
chr1	21620776	21621100	21620938	41.9559	4.22383	prot	NR_038404	LOC100506801	T cell
chr1	21646640	21646758	21646721	156.298	4.84183	intron	NM_001113348	ECE1	K562
chr1	21651350	21651674	21651512	39.8538	4.22383	intron	NM_001113348	ECE1	T cell
chr1	21664052	21664552	21664302	81.4225	4.0491	intron	NM_001113348	ECE1	ECC-1
chr1	21664165	21664371	21664266	150.839	3.68797	intron	NM_001113348	ECE1	PANC-1
chr1	21664181	21664421	21664301	68.7835	2.67161	intron	NM_001113348	ECE1	HeLa S3
chr1	21664184	21664411	21664286	133.084	3.92174	intron	NM_001113348	ECE1	HL-60
chr1	21664214	21664318	21664266	69.954	4.31237	intron	NM_001113348	ECE1	SK-N-SH
chr1	21664217	21664721	21664469	46.4868	2.65314	intron	NM_001113348	ECE1	PANC-1
chr1	21835541	21835885	21835713	72.8903	3.77151	prot	NM_000478	ALPL	PFSK-1
chr1	21861342	21861718	21861530	109.198	3.58512	intron	NM_000478	ALPL	HCT-116
chr1	21861351	21861736	21861543	720.805	4.0491	intron	NM_000478	ALPL	ECC-1
chr1	21861382	21861713	21861544	399.947	4.08618	intron	NM_000478	ALPL	MCF-7
chr1	21861384	21861689	21861532	307.012	3.92174	intron	NM_000478	ALPL	HL-60
chr1	21861385	21861673	21861533	139.764	3.88906	intron	NM_000478	ALPL	A549
chr1	21861399	21861659	21861529	66.8989	2.56448	intron	NM_000478	ALPL	Hep G2
chr1	21861421	21861653	21861530	431.248	4.2441	intron	NM_000478	ALPL	H1 ESC
chr1	21861431	21861648	21861541	220.296	4.31237	intron	NM_000478	ALPL	SK-N-SH
chr1	21861443	21861636	21861536	202.589	2.97525	intron	NM_000478	ALPL	HeLa S3
chr1	21861450	21861630	21861547	252.438	4.84183	intron	NM_000478	ALPL	K562
chr1	21861457	21861643	21861550	148.904	3.68797	intron	NM_000478	ALPL	PANC-1
chr1	21861498	21862002	21861750	41.0482	2.1099	intron	NM_000478	ALPL	PANC-1
chr1	21920967	21921288	21921138	213.191	4.0491	distal	NM_002885	RAP1GAP	ECC-1
chr1	21920987	21921279	21921132	108.572	3.88906	distal	NM_002885	RAP1GAP	A549
chr1	21921002	21921254	21921131	125.854	4.08618	distal	NM_002885	RAP1GAP	MCF-7
chr1	21921013	21921234	21921126	143.403	3.68797	distal	NM_002885	RAP1GAP	PANC-1
chr1	21921016	21921233	21921122	330.319	4.2441	distal	NM_002885	RAP1GAP	H1 ESC
chr1	21921023	21921254	21921135	195.148	4.31237	distal	NM_002885	RAP1GAP	SK-N-SH
chr1	21921031	21921224	21921123	215.261	2.96275	distal	NM_002885	RAP1GAP	HeLa S3
chr1	21921034	21921232	21921121	190.645	4.84183	distal	NM_002885	RAP1GAP	K562
chr1	21921061	21921230	21921141	94.9137	3.59073	distal	NM_002885	RAP1GAP	U87
chr1	21931067	21931337	21931202	79.4037	3.25406	intron	NM_002885	RAP1GAP	GM12878
chr1	21931090	21931306	21931198	36.1832	4.2441	intron	NM_002885	RAP1GAP	H1 ESC
chr1	21931137	21931278	21931199	123.636	3.59073	intron	NM_002885	RAP1GAP	U87
chr1	21974266	21974914	21974594	1929.99	4.22383	intron	NM_002885	RAP1GAP	T cell
chr1	21974273	21974897	21974586	4520.94	4.0491	intron	NM_002885	RAP1GAP	ECC-1
chr1	21974289	21974872	21974585	2043.4	3.88906	intron	NM_002885	RAP1GAP	A549
chr1	21974301	21974872	21974596	4030.88	3.92174	intron	NM_002885	RAP1GAP	HL-60
chr1	21974346	21974786	21974598	4155.43	3.58512	intron	NM_002885	RAP1GAP	HCT-116
chr1	21974350	21974823	21974585	995.72	3.68797	intron	NM_002885	RAP1GAP	PANC-1
chr1	21974362	21974810	21974589	4219.6	3.77151	intron	NM_002885	RAP1GAP	PFSK-1
chr1	21974367	21974797	21974598	1790.56	3.59073	intron	NM_002885	RAP1GAP	U87
chr1	21974369	21974806	21974586	2404.02	4.08618	intron	NM_002885	RAP1GAP	MCF-7
chr1	21974394	21974775	21974582	16732.3	4.84183	intron	NM_002885	RAP1GAP	K562
chr1	21974407	21974758	21974596	2240.18	4.31237	intron	NM_002885	RAP1GAP	SK-N-SH
chr1	21974417	21974748	21974582	5294.05	4.2441	intron	NM_002885	RAP1GAP	H1 ESC
chr1	21974434	21974735	21974594	3105.58	3.70372	intron	NM_002885	RAP1GAP	GM12878
chr1	21974440	21974734	21974588	1524.95	3.65137	intron	NM_002885	RAP1GAP	Hep G2
chr1	21974441	21974742	21974596	2756.56	3.55376	intron	NM_002885	RAP1GAP	HeLa S3
chr1	21978164	21978402	21978283	149.544	4.22383	exon	NM_002885	RAP1GAP	T cell
chr1	21985455	21986274	21985806	27147.5	4.22383	intron	NM_002885	RAP1GAP	T cell
chr1	21985521	21986158	21985802	2921.03	3.88906	intron	NM_002885	RAP1GAP	A549
chr1	21985561	21986237	21985806	7780.81	3.92174	intron	NM_002885	RAP1GAP	HL-60
chr1	21985571	21986172	21985808	4682.45	4.0491	intron	NM_002885	RAP1GAP	ECC-1
chr1	21985573	21986086	21985797	2679.98	3.68797	intron	NM_002885	RAP1GAP	PANC-1
chr1	21985578	21986036	21985806	6095.18	3.77151	intron	NM_002885	RAP1GAP	PFSK-1
chr1	21985594	21986079	21985808	2199.48	4.08618	intron	NM_002885	RAP1GAP	MCF-7
chr1	21985605	21986017	21985805	4499.72	3.59073	intron	NM_002885	RAP1GAP	U87
chr1	21985613	21986014	21985808	3870.97	3.58512	intron	NM_002885	RAP1GAP	HCT-116
chr1	21985620	21986016	21985795	4570.59	4.31237	intron	NM_002885	RAP1GAP	SK-N-SH
chr1	21985627	21986052	21985808	14632.2	4.84183	intron	NM_002885	RAP1GAP	K562
chr1	21985637	21986014	21985811	4982.14	3.65137	intron	NM_002885	RAP1GAP	Hep G2
chr1	21985641	21985986	21985799	3676.21	4.2441	intron	NM_002885	RAP1GAP	H1 ESC
chr1	21985648	21985974	21985808	4013.01	3.55376	intron	NM_002885	RAP1GAP	HeLa S3
chr1	21985651	21985990	21985809	4187.88	3.70372	intron	NM_002885	RAP1GAP	GM12878
chr1	21985697	21985921	21985814	99.2476	4.37049	intron	NM_002885	RAP1GAP	Neuron
chr1	22002560	22002776	22002668	85.9924	4.84183	distal	NM_002885	RAP1GAP	K562
chr1	22032969	22033469	22033219	62.9809	4.0491	exon	NM_032236	USP48	ECC-1
chr1	22033004	22033428	22033225	878.525	3.92174	exon	NM_032236	USP48	HL-60
chr1	22033030	22033390	22033210	72.9976	3.59073	exon	NM_032236	USP48	U87
chr1	22033090	22033350	22033220	58.224	2.04619	exon	NM_032236	USP48	Hep G2
chr1	22033094	22033362	22033237	1120.11	4.2441	exon	NM_032236	USP48	H1 ESC
chr1	22033198	22033341	22033254	140.228	4.84183	exon	NM_032236	USP48	K562
chr1	22109742	22109933	22109798	76.7636	4.37049	prot	NM_032236	USP48	Neuron
chr1	22231531	22231800	22231637	285.926	4.84183	intron	NM_005529	HSPG2	K562
chr1	22233297	22233513	22233405	87.0588	4.84183	intron	NM_005529	HSPG2	K562
chr1	22282482	22282826	22282654	48.1029	3.37002	distal	NM_005529	HSPG2	PFSK-1
chr1	22282562	22282778	22282670	66.3541	4.2441	distal	NM_005529	HSPG2	H1 ESC
chr1	22282572	22282734	22282662	74.7834	4.22383	distal	NM_005529	HSPG2	T cell
chr1	22290468	22290812	22290640	54.1787	3.32681	distal	NM_007352	CELA3B	PFSK-1
chr1	22379163	22379408	22379286	105.968	4.37049	prot	NM_001039802	CDC42	Neuron
chr1	22516143	22516477	22516309	200.479	4.0491	distal	NM_030761	WNT4	ECC-1
chr1	22516169	22516487	22516323	292.473	3.92174	distal	NM_030761	WNT4	HL-60
chr1	22516173	22516446	22516313	129.381	3.88906	distal	NM_030761	WNT4	A549
chr1	22516177	22516427	22516312	121.129	4.08618	distal	NM_030761	WNT4	MCF-7
chr1	22516201	22516358	22516311	128.912	3.68797	distal	NM_030761	WNT4	PANC-1
chr1	22516201	22516435	22516313	618.732	4.84183	distal	NM_030761	WNT4	K562
chr1	22516222	22516414	22516314	235.649	4.2441	distal	NM_030761	WNT4	H1 ESC
chr1	22516223	22516356	22516323	94.3602	3.58512	distal	NM_030761	WNT4	HCT-116
chr1	22516240	22516395	22516316	135.726	2.90871	distal	NM_030761	WNT4	HeLa S3
chr1	22516255	22516381	22516324	82.9052	4.31237	distal	NM_030761	WNT4	SK-N-SH
chr1	22516265	22516344	22516337	240.663	3.70372	distal	NM_030761	WNT4	GM12878
chr1	22542614	22543118	22542866	42.092	2.16081	inter	none	NA	PANC-1
chr1	22542693	22543051	22542887	331.638	4.0491	inter	none	NA	ECC-1
chr1	22542765	22543009	22542909	101.297	4.08618	inter	none	NA	MCF-7
chr1	22542782	22542998	22542890	73.9414	4.2441	inter	none	NA	H1 ESC
chr1	22542799	22542987	22542895	201.994	4.84183	inter	none	NA	K562
chr1	22542825	22542982	22542888	125.756	2.81284	inter	none	NA	HeLa S3
chr1	22542886	22542952	22542890	109.671	3.65137	inter	none	NA	Hep G2
chr1	22668504	22668994	22668749	104.269	4.37049	inter	none	NA	Neuron
chr1	22696686	22696888	22696779	88.4192	4.0491	inter	none	NA	ECC-1
chr1	22696729	22696847	22696779	112.145	4.2441	inter	none	NA	H1 ESC
chr1	22778310	22778557	22778414	106.487	4.22383	prot	NM_001083621	ZBTB40	T cell
chr1	22933606	22934062	22933804	1437.71	4.0491	distal	NM_015991	C1QA	ECC-1
chr1	22933610	22934008	22933800	781.698	3.92174	distal	NM_015991	C1QA	HL-60
chr1	22933631	22933974	22933806	404.218	4.08618	distal	NM_015991	C1QA	MCF-7
chr1	22933647	22934016	22933816	233.462	3.88906	distal	NM_015991	C1QA	A549
chr1	22933656	22933999	22933815	278.626	3.68797	distal	NM_015991	C1QA	PANC-1
chr1	22933658	22933942	22933792	284.375	3.58512	distal	NM_015991	C1QA	HCT-116
chr1	22933661	22933955	22933807	523.123	3.77151	distal	NM_015991	C1QA	PFSK-1
chr1	22933666	22933945	22933799	2826.37	4.84183	distal	NM_015991	C1QA	K562
chr1	22933669	22933929	22933805	687.982	3.65137	distal	NM_015991	C1QA	Hep G2
chr1	22933680	22933944	22933807	2445.77	4.2441	distal	NM_015991	C1QA	H1 ESC
chr1	22933681	22933952	22933808	399.445	3.59073	distal	NM_015991	C1QA	U87
chr1	22933682	22933930	22933795	310.845	4.31237	distal	NM_015991	C1QA	SK-N-SH
chr1	22933684	22933939	22933808	847.182	3.55376	distal	NM_015991	C1QA	HeLa S3
chr1	22933694	22933912	22933805	458.851	3.70372	distal	NM_015991	C1QA	GM12878
chr1	22933724	22933926	22933849	105.338	4.22383	distal	NM_015991	C1QA	T cell
chr1	22933892	22934216	22934054	36.4427	4.22383	distal	NM_015991	C1QA	T cell
chr1	22937800	22938443	22938148	1343.31	3.68797	distal	NM_015991	C1QA	PANC-1
chr1	22937805	22938563	22938160	3648.47	3.92174	distal	NM_015991	C1QA	HL-60
chr1	22937815	22938503	22938155	1360.36	3.88906	distal	NM_015991	C1QA	A549
chr1	22937866	22938587	22938160	3735.03	4.0491	distal	NM_015991	C1QA	ECC-1
chr1	22937921	22938403	22938149	2519.68	4.08618	distal	NM_015991	C1QA	MCF-7
chr1	22937953	22938355	22938153	1777.47	3.58512	distal	NM_015991	C1QA	HCT-116
chr1	22937957	22938437	22938144	1246.24	4.22383	distal	NM_015991	C1QA	T cell
chr1	22937963	22938373	22938155	2566.97	3.77151	distal	NM_015991	C1QA	PFSK-1
chr1	22937973	22938353	22938155	1429.01	3.59073	distal	NM_015991	C1QA	U87
chr1	22937989	22938325	22938154	6154.52	4.84183	distal	NM_015991	C1QA	K562
chr1	22937990	22938332	22938149	1860.89	4.31237	distal	NM_015991	C1QA	SK-N-SH
chr1	22938003	22938310	22938156	4163.29	3.65137	distal	NM_015991	C1QA	Hep G2
chr1	22938006	22938326	22938154	2288.98	3.55376	distal	NM_015991	C1QA	HeLa S3
chr1	22938007	22938309	22938155	5347.65	4.2441	distal	NM_015991	C1QA	H1 ESC
chr1	22938015	22938288	22938155	1825.92	3.70372	distal	NM_015991	C1QA	GM12878
chr1	22938059	22938262	22938153	105.978	4.37049	distal	NM_015991	C1QA	Neuron
chr1	22951946	22952447	22952205	1255.11	4.0491	distal	NM_015991	C1QA	ECC-1
chr1	22951981	22952398	22952205	1087.86	4.08618	distal	NM_015991	C1QA	MCF-7
chr1	22952002	22952400	22952209	819.843	3.92174	distal	NM_015991	C1QA	HL-60
chr1	22952015	22952401	22952211	257.622	3.88906	distal	NM_015991	C1QA	A549
chr1	22952048	22952369	22952209	563.339	3.58512	distal	NM_015991	C1QA	HCT-116
chr1	22952055	22952390	22952209	273.378	3.68797	distal	NM_015991	C1QA	PANC-1
chr1	22952063	22952343	22952203	639.991	4.31237	distal	NM_015991	C1QA	SK-N-SH
chr1	22952065	22952343	22952211	2156.26	4.2441	distal	NM_015991	C1QA	H1 ESC
chr1	22952069	22952332	22952199	568.091	3.65137	distal	NM_015991	C1QA	Hep G2
chr1	22952073	22952328	22952211	666.881	3.55376	distal	NM_015991	C1QA	HeLa S3
chr1	22952078	22952311	22952204	157.888	3.59073	distal	NM_015991	C1QA	U87
chr1	22952079	22952333	22952210	688.289	4.84183	distal	NM_015991	C1QA	K562
chr1	22952081	22952312	22952200	144.434	3.77151	distal	NM_015991	C1QA	PFSK-1
chr1	22952090	22952305	22952193	472.387	3.70372	distal	NM_015991	C1QA	GM12878
chr1	22952220	22952301	22952225	64.9265	4.22383	distal	NM_015991	C1QA	T cell
chr1	23119660	23119876	23119768	48.4041	4.2441	intron	NM_017449	EPHB2	H1 ESC
chr1	23119662	23119890	23119793	111.777	4.0491	intron	NM_017449	EPHB2	ECC-1
chr1	23346505	23346995	23346750	79.6439	4.37049	prot	NM_001009999	KDM1A	Neuron
chr1	23407319	23407823	23407571	60.7074	3.00026	intron	NM_001009999	KDM1A	PANC-1
chr1	23407477	23407627	23407556	78.9892	4.31237	intron	NM_001009999	KDM1A	SK-N-SH
chr1	23407504	23407647	23407571	129.684	4.2441	intron	NM_001009999	KDM1A	H1 ESC
chr1	23407520	23407660	23407602	93.5766	4.0491	intron	NM_001009999	KDM1A	ECC-1
chr1	23671030	23671297	23671244	76.0835	4.37049	prot	NM_001102398	HNRNPR	Neuron
chr1	23695475	23695799	23695637	35.2394	4.22383	prot	NR_033690	C1orf213	T cell
chr1	23754000	23754516	23754258	95.3485	3.92174	prot	NM_003196	TCEA3	HL-60
chr1	23754002	23754506	23754254	74.5128	3.68797	prot	NM_003196	TCEA3	PANC-1
chr1	23754059	23754409	23754228	312.902	4.0491	prot	NM_003196	TCEA3	ECC-1
chr1	23754127	23754340	23754245	89.8296	4.08618	prot	NM_003196	TCEA3	MCF-7
chr1	23754153	23754323	23754238	168.581	4.84183	prot	NM_003196	TCEA3	K562
chr1	23754158	23754323	23754229	107.019	4.31237	prot	NM_003196	TCEA3	SK-N-SH
chr1	23754162	23754314	23754230	131.538	2.91419	prot	NM_003196	TCEA3	HeLa S3
chr1	23754174	23754320	23754247	126.196	4.2441	prot	NM_003196	TCEA3	H1 ESC
chr1	23882658	23882898	23882778	68.2964	2.67335	distal	NM_002167	ID3	HeLa S3
chr1	23882671	23882866	23882775	215.767	4.2441	distal	NM_002167	ID3	H1 ESC
chr1	23912186	23912351	23912273	96.1562	3.88906	distal	NM_002167	ID3	A549
chr1	23999488	24000235	23999767	3084.52	4.0491	distal	NM_000975	RPL11	ECC-1
chr1	23999511	24000083	23999767	1157.43	3.88906	distal	NM_000975	RPL11	A549
chr1	23999511	24000138	23999968	97.0151	3.88906	distal	NM_000975	RPL11	A549
chr1	23999532	24000011	23999758	2583.9	3.92174	distal	NM_000975	RPL11	HL-60
chr1	23999549	23999999	23999765	610.894	3.68797	distal	NM_000975	RPL11	PANC-1
chr1	23999570	23999968	23999765	1714.52	4.08618	distal	NM_000975	RPL11	MCF-7
chr1	23999576	23999957	23999758	2477.39	3.77151	distal	NM_000975	RPL11	PFSK-1
chr1	23999589	23999933	23999757	1292.29	3.58512	distal	NM_000975	RPL11	HCT-116
chr1	23999599	23999926	23999766	694.221	4.22383	distal	NM_000975	RPL11	T cell
chr1	23999602	23999937	23999763	6539.02	4.84183	distal	NM_000975	RPL11	K562
chr1	23999608	23999920	23999758	1155.97	3.59073	distal	NM_000975	RPL11	U87
chr1	23999608	23999935	23999765	1544.22	4.31237	distal	NM_000975	RPL11	SK-N-SH
chr1	23999615	23999911	23999758	3209.29	3.65137	distal	NM_000975	RPL11	Hep G2
chr1	23999621	23999901	23999758	2195.01	3.70372	distal	NM_000975	RPL11	GM12878
chr1	23999622	23999916	23999763	2338.51	3.55376	distal	NM_000975	RPL11	HeLa S3
chr1	23999623	23999913	23999763	3604.33	4.2441	distal	NM_000975	RPL11	H1 ESC
chr1	24018199	24018548	24018377	306.37	3.92174	prot	NM_000975	RPL11	HL-60
chr1	24018204	24018477	24018347	154.549	3.88906	prot	NM_000975	RPL11	A549
chr1	24018221	24018538	24018409	252.608	4.37049	prot	NM_000975	RPL11	Neuron
chr1	24104503	24104598	24104540	103.559	4.84183	prot	NR_038280	LOC100506963	K562
chr1	24104825	24105149	24104987	35.4947	4.22383	prot	NM_020362	PITHD1	T cell
chr1	24151700	24151958	24151835	105.471	4.37049	prot	NM_000191	HMGCL	Neuron
chr1	24189065	24189569	24189317	46.3039	2.59173	intron	NM_000147	FUCA1	PANC-1
chr1	24189076	24189576	24189326	56.0049	4.0491	intron	NM_000147	FUCA1	ECC-1
chr1	24189251	24189411	24189330	162.045	4.2441	intron	NM_000147	FUCA1	H1 ESC
chr1	24189268	24189407	24189324	108.929	4.84183	intron	NM_000147	FUCA1	K562
chr1	24263200	24263704	24263452	73.1381	3.68797	distal	NR_039615	MIR378F	PANC-1
chr1	24263227	24263646	24263430	800.812	4.0491	distal	NR_039615	MIR378F	ECC-1
chr1	24263263	24263623	24263443	51.7181	2.72853	distal	NR_039615	MIR378F	U87
chr1	24263264	24263640	24263452	43.7566	1.36117	distal	NR_039615	MIR378F	HCT-116
chr1	24263287	24263560	24263426	1263.64	4.2441	distal	NR_039615	MIR378F	H1 ESC
chr1	24263290	24263568	24263430	1748.81	4.84183	distal	NR_039615	MIR378F	K562
chr1	24263293	24263563	24263428	129.884	3.70372	distal	NR_039615	MIR378F	GM12878
chr1	24263309	24263571	24263424	93.2879	3.88906	distal	NR_039615	MIR378F	A549
chr1	24263313	24263579	24263430	163.524	4.08618	distal	NR_039615	MIR378F	MCF-7
chr1	24263317	24263551	24263433	282.581	3.65137	distal	NR_039615	MIR378F	Hep G2
chr1	24263317	24263596	24263450	198.722	3.92174	distal	NR_039615	MIR378F	HL-60
chr1	24263328	24263551	24263438	208.269	4.31237	distal	NR_039615	MIR378F	SK-N-SH
chr1	24263332	24263531	24263426	185.376	2.99202	distal	NR_039615	MIR378F	HeLa S3
chr1	24263364	24263517	24263443	81.7637	3.77151	distal	NR_039615	MIR378F	PFSK-1
chr1	24286241	24286511	24286411	100.758	3.88906	prot	NM_017761	PNRC2	A549
chr1	24286252	24286613	24286327	165.288	4.37049	prot	NM_017761	PNRC2	Neuron
chr1	24286252	24286615	24286541	73.3063	4.37049	prot	NM_017761	PNRC2	Neuron
chr1	24306520	24306844	24306682	55.0505	4.22383	prot	NM_001191007	SRSF10	T cell
chr1	24454661	24454877	24454773	92.5292	4.0491	exon	NM_021258	IL22RA1	ECC-1
chr1	24454723	24454833	24454783	101.341	4.84183	exon	NM_021258	IL22RA1	K562
chr1	24454733	24454811	24454791	117.594	4.2441	exon	NM_021258	IL22RA1	H1 ESC
chr1	24524091	24524565	24524289	1114.06	3.92174	prot	NR_027087	LOC284632	HL-60
chr1	24524107	24524490	24524298	496.673	4.0491	prot	NR_027087	LOC284632	ECC-1
chr1	24524121	24524479	24524306	210.99	3.88906	prot	NR_027087	LOC284632	A549
chr1	24524146	24524426	24524292	145.51	4.08618	prot	NR_027087	LOC284632	MCF-7
chr1	24524154	24524472	24524299	234.643	3.68797	prot	NR_027087	LOC284632	PANC-1
chr1	24524163	24524433	24524298	87.7023	3.22694	prot	NR_027087	LOC284632	GM12878
chr1	24524171	24524410	24524287	265.826	4.31237	prot	NR_027087	LOC284632	SK-N-SH
chr1	24524175	24524407	24524290	562.683	4.2441	prot	NR_027087	LOC284632	H1 ESC
chr1	24524179	24524407	24524290	532.238	4.84183	prot	NR_027087	LOC284632	K562
chr1	24524183	24524406	24524294	360.343	3.55376	prot	NR_027087	LOC284632	HeLa S3
chr1	24524189	24524397	24524290	92.1796	3.77151	prot	NR_027087	LOC284632	PFSK-1
chr1	24524208	24524378	24524289	121.309	3.65137	prot	NR_027087	LOC284632	Hep G2
chr1	24765066	24765282	24765174	78.8861	4.84183	intron	NM_020448	NIPAL3	K562
chr1	24885495	24885839	24885667	53.3865	3.33345	intron	NM_001010980	NCMAP	PFSK-1
chr1	24969003	24969403	24969235	140.588	4.37049	prot	NM_005839	SRRM1	Neuron
chr1	25071786	25072130	25071958	79.0505	3.77151	prot	NM_013943	CLIC4	PFSK-1
chr1	25169888	25170138	25170010	168.476	3.92174	exon	NM_013943	CLIC4	HL-60
chr1	25258892	25259051	25258964	49.724	4.22383	intron	NM_001031680	RUNX3	T cell
chr1	25349284	25349375	25349325	59.6231	4.22383	inter	none	NA	T cell
chr1	25431407	25431707	25431562	309.186	3.92174	inter	none	NA	HL-60
chr1	25431434	25431674	25431554	68.8604	2.67117	inter	none	NA	HeLa S3
chr1	25431462	25431678	25431553	96.4653	4.0491	inter	none	NA	ECC-1
chr1	25431499	25431593	25431557	108.361	4.2441	inter	none	NA	H1 ESC
chr1	25558545	25558902	25558707	292.546	4.22383	prot	NM_015484	SYF2	T cell
chr1	25558795	25558997	25558926	109.705	4.37049	prot	NM_015484	SYF2	Neuron
chr1	25566173	25566497	25566335	43.0135	4.22383	distal	NM_015484	SYF2	T cell
chr1	25573766	25573911	25573865	94.9531	4.22383	prot	NM_020317	C1orf63	T cell
chr1	25606397	25606509	25606499	107.055	4.84183	intron	NM_001127691	RHD	K562
chr1	25739862	25739991	25739968	141.794	4.84183	intron	NM_138616	RHCE	K562
chr1	25756603	25757119	25756861	95.2555	3.92174	prot	NM_018202	TMEM57	HL-60
chr1	25756739	25757062	25756884	224.598	4.37049	prot	NM_018202	TMEM57	Neuron
chr1	25756750	25756966	25756858	80.1214	4.84183	prot	NM_018202	TMEM57	K562
chr1	25919099	25919396	25919252	104.29	4.0491	distal	NM_020379	MAN1C1	ECC-1
chr1	25919202	25919314	25919268	107.056	4.2441	distal	NM_020379	MAN1C1	H1 ESC
chr1	26000764	26001004	26000884	66.9395	2.67852	intron	NM_020379	MAN1C1	HeLa S3
chr1	26057125	26057629	26057377	69.2828	3.68797	intron	NM_020379	MAN1C1	PANC-1
chr1	26057143	26057589	26057388	1776.69	3.92174	intron	NM_020379	MAN1C1	HL-60
chr1	26057149	26057533	26057367	482.608	4.22383	intron	NM_020379	MAN1C1	T cell
chr1	26057180	26057554	26057380	399.113	4.0491	intron	NM_020379	MAN1C1	ECC-1
chr1	26057199	26057575	26057387	75.112	3.10868	intron	NM_020379	MAN1C1	HCT-116
chr1	26057233	26057520	26057389	256.355	3.77151	intron	NM_020379	MAN1C1	PFSK-1
chr1	26057239	26057499	26057369	39.5536	1.04361	intron	NM_020379	MAN1C1	Hep G2
chr1	26057258	26057497	26057377	493.533	4.84183	intron	NM_020379	MAN1C1	K562
chr1	26057275	26057498	26057381	221.013	4.31237	intron	NM_020379	MAN1C1	SK-N-SH
chr1	26057277	26057486	26057383	343.271	4.2441	intron	NM_020379	MAN1C1	H1 ESC
chr1	26057278	26057489	26057375	499.894	3.70372	intron	NM_020379	MAN1C1	GM12878
chr1	26057294	26057517	26057400	218.732	3.59073	intron	NM_020379	MAN1C1	U87
chr1	26057305	26057460	26057380	128.969	2.80971	intron	NM_020379	MAN1C1	HeLa S3
chr1	26109395	26109501	26109448	109.156	4.84183	intron	NM_020379	MAN1C1	K562
chr1	26148262	26148478	26148370	83.8296	4.84183	exon	NR_024498	LOC646471	K562
chr1	26231520	26231664	26231618	92.5061	4.37049	intron	NM_203399|NM_001145454	STMN1	Neuron
chr1	26251423	26251639	26251531	82.8992	4.84183	distal	NM_203399	STMN1	K562
chr1	26259997	26260213	26260105	91.7526	4.84183	distal	NM_203399	STMN1	K562
chr1	26324680	26325004	26324842	55.7914	4.22383	prot	NM_000437	PAFAH2	T cell
chr1	26324896	26325092	26324977	99.1145	4.37049	prot	NM_000437	PAFAH2	Neuron
chr1	26437355	26437645	26437509	142.224	4.37049	prot	NM_001243532	PDIK1L	Neuron
chr1	26438151	26438370	26438274	78.6728	4.22383	prot	NM_001243532	PDIK1L	T cell
chr1	26438176	26438666	26438421	82.4567	4.37049	prot	NM_001243532	PDIK1L	Neuron
chr1	26613629	26613771	26613681	134.614	4.84183	intron	NM_145345	UBXN11	K562
chr1	26704646	26704970	26704808	42.7372	4.22383	distal	NM_173574	ZNF683	T cell
chr1	26705024	26705117	26705105	92.4165	4.84183	distal	NM_173574	ZNF683	K562
chr1	26722340	26722549	26722445	255.709	4.84183	distal	NM_024674	LIN28A	K562
chr1	26733852	26734176	26734014	57.8001	4.22383	prot	NM_024674	LIN28A	T cell
chr1	26734414	26735864	26735216	32616.6	4.22383	prot	NM_024674	LIN28A	T cell
chr1	26734825	26735690	26735208	7235.51	3.88906	prot	NM_024674	LIN28A	A549
chr1	26734930	26735680	26735215	15683	3.92174	prot	NM_024674	LIN28A	HL-60
chr1	26734942	26735623	26735209	10728	4.0491	prot	NM_024674	LIN28A	ECC-1
chr1	26734942	26735646	26735215	5535.25	3.68797	prot	NM_024674	LIN28A	PANC-1
chr1	26734965	26735443	26735221	15939.7	3.77151	prot	NM_024674	LIN28A	PFSK-1
chr1	26734979	26735502	26735209	4866.75	4.08618	prot	NM_024674	LIN28A	MCF-7
chr1	26734982	26735457	26735215	8792.15	3.58512	prot	NM_024674	LIN28A	HCT-116
chr1	26734991	26735418	26735205	7317.22	4.31237	prot	NM_024674	LIN28A	SK-N-SH
chr1	26734993	26735413	26735215	32429.2	4.84183	prot	NM_024674	LIN28A	K562
chr1	26734993	26735430	26735221	8303.77	3.59073	prot	NM_024674	LIN28A	U87
chr1	26735039	26735383	26735212	15256.8	4.2441	prot	NM_024674	LIN28A	H1 ESC
chr1	26735041	26735385	26735217	12758.8	3.65137	prot	NM_024674	LIN28A	Hep G2
chr1	26735046	26735387	26735205	12632.5	3.55376	prot	NM_024674	LIN28A	HeLa S3
chr1	26735056	26735373	26735214	314.359	4.37049	prot	NM_024674	LIN28A	Neuron
chr1	26735057	26735382	26735209	7574.42	3.70372	prot	NM_024674	LIN28A	GM12878
chr1	26735715	26736091	26735903	31.9954	0.655662	prot	NM_024674	LIN28A	HCT-116
chr1	26736343	26736424	26736415	35.1746	4.22383	prot	NM_024674	LIN28A	T cell
chr1	26737671	26737995	26737833	41.2033	4.22383	prot	NM_024674	LIN28A	T cell
chr1	26739499	26740003	26739751	58.9325	3.00852	intron	NM_024674	LIN28A	PANC-1
chr1	26739530	26739906	26739718	29.1659	0.49506	intron	NM_024674	LIN28A	HCT-116
chr1	26739618	26739813	26739715	74.6461	4.0491	intron	NM_024674	LIN28A	ECC-1
chr1	26743538	26743882	26743710	60.5804	3.77151	intron	NM_024674	LIN28A	PFSK-1
chr1	26758637	26758856	26758737	94.4183	4.22383	prot	NM_001243564	DHDDS	T cell
chr1	26797779	26798794	26798291	2561.4	4.22383	prot	NM_005517	HMGN2	T cell
chr1	26797890	26798694	26798287	784.058	4.0491	prot	NM_005517	HMGN2	ECC-1
chr1	26797970	26798705	26798296	430.118	3.88906	prot	NM_005517	HMGN2	A549
chr1	26798051	26798694	26798303	723.342	3.92174	prot	NM_005517	HMGN2	HL-60
chr1	26798059	26798606	26798294	384.388	4.08618	prot	NM_005517	HMGN2	MCF-7
chr1	26798065	26798532	26798297	451.756	3.68797	prot	NM_005517	HMGN2	PANC-1
chr1	26798065	26798621	26798498	116.666	3.68797	prot	NM_005517	HMGN2	PANC-1
chr1	26798093	26798488	26798302	227.908	4.31237	prot	NM_005517	HMGN2	SK-N-SH
chr1	26798112	26798478	26798328	283.695	3.59073	prot	NM_005517	HMGN2	U87
chr1	26798126	26798648	26798293	1271.8	4.84183	prot	NM_005517	HMGN2	K562
chr1	26798137	26798450	26798293	608.816	4.2441	prot	NM_005517	HMGN2	H1 ESC
chr1	26798162	26798457	26798308	235.427	3.77151	prot	NM_005517	HMGN2	PFSK-1
chr1	26798167	26798439	26798299	503.307	3.55376	prot	NM_005517	HMGN2	HeLa S3
chr1	26798169	26798430	26798302	289.148	3.58512	prot	NM_005517	HMGN2	HCT-116
chr1	26798177	26798413	26798293	468.555	3.70372	prot	NM_005517	HMGN2	GM12878
chr1	26798216	26798378	26798297	100.33	3.65137	prot	NM_005517	HMGN2	Hep G2
chr1	26799006	26799220	26799118	57.2994	4.22383	prot	NM_005517	HMGN2	T cell
chr1	26799452	26799812	26799632	56.5441	2.95742	prot	NM_005517	HMGN2	U87
chr1	26799573	26799897	26799735	46.0497	4.22383	prot	NM_005517	HMGN2	T cell
chr1	26800410	26800734	26800572	39.6023	4.22383	exon	NM_005517	HMGN2	T cell
chr1	26861995	26862122	26862055	39.8173	4.22383	intron	NM_002953	RPS6KA1	T cell
chr1	26863456	26863513	26863461	85.3011	4.2441	exon	NM_002953	RPS6KA1	H1 ESC
chr1	26868386	26868551	26868503	41.5868	4.22383	intron	NM_002953	RPS6KA1	T cell
chr1	26905969	26906469	26906219	60.6783	4.0491	distal	hsa-mir-1976|NR_031740	hsa-mir-1976|MIR1976	ECC-1
chr1	26906109	26906331	26906208	546.978	4.84183	distal	hsa-mir-1976|NR_031740	hsa-mir-1976|MIR1976	K562
chr1	26906121	26906337	26906221	126.643	3.92174	distal	NR_031740|hsa-mir-1976	MIR1976|hsa-mir-1976	HL-60
chr1	26906137	26906289	26906219	146.956	2.89154	distal	NR_031740|hsa-mir-1976	MIR1976|hsa-mir-1976	HeLa S3
chr1	26906142	26906327	26906242	331.586	3.70372	distal	NR_031740|hsa-mir-1976	MIR1976|hsa-mir-1976	GM12878
chr1	26906157	26906288	26906221	151.546	4.2441	distal	NR_031740|hsa-mir-1976	MIR1976|hsa-mir-1976	H1 ESC
chr1	26906204	26906336	26906224	56.6952	4.22383	distal	hsa-mir-1976|NR_031740	hsa-mir-1976|MIR1976	T cell
chr1	26947070	26947560	26947315	82.1309	4.37049	distal	NM_002953	RPS6KA1	Neuron
chr1	26972162	26972666	26972414	69.1327	3.68797	distal	NM_006015	ARID1A	PANC-1
chr1	26972284	26972593	26972428	181.711	4.0491	distal	NM_006015	ARID1A	ECC-1
chr1	26972285	26972582	26972431	208.781	3.92174	distal	NM_006015	ARID1A	HL-60
chr1	26972350	26972519	26972440	186.928	4.84183	inter	none	NA	K562
chr1	26972354	26972501	26972425	138.166	4.2441	inter	none	NA	H1 ESC
chr1	26972396	26972491	26972443	86.9421	2.89079	inter	none	NA	HeLa S3
chr1	27019471	27019795	27019633	61.1116	4.22383	prot	NM_006015	ARID1A	T cell
chr1	27021972	27022316	27022144	51.997	3.34262	prot	NM_006015	ARID1A	PFSK-1
chr1	27022051	27022222	27022144	74.4268	4.22383	prot	NM_006015	ARID1A	T cell
chr1	27022089	27022395	27022269	118.904	4.37049	prot	NM_006015	ARID1A	Neuron
chr1	27022162	27022394	27022272	152.706	3.92174	prot	NM_006015	ARID1A	HL-60
chr1	27050081	27050297	27050189	81.3051	4.84183	intron	NM_006015	ARID1A	K562
chr1	27051520	27051753	27051640	111.753	4.37049	intron	NM_006015	ARID1A	Neuron
chr1	27112463	27112787	27112625	39.8392	4.22383	prot	NM_017837	PIGV	T cell
chr1	27114038	27114528	27114283	81.7172	4.37049	prot	NM_017837	PIGV	Neuron
chr1	27118175	27118247	27118223	106.466	4.84183	intron	NM_017837	PIGV	K562
chr1	27189632	27190136	27189884	55.8772	2.87564	prot	NM_006142	SFN	PANC-1
chr1	27217589	27217805	27217697	78.145	4.84183	prot	NM_018066	GPN2	K562
chr1	27226624	27227140	27226882	85.6072	3.92174	prot	NM_022078	GPATCH3	HL-60
chr1	27226641	27227241	27226941	97.4524	3.88906	prot	NM_022078	GPATCH3	A549
chr1	27226673	27227163	27226918	87.5905	4.37049	prot	NM_022078	GPATCH3	Neuron
chr1	27443016	27443532	27443274	100.496	3.92174	intron	NR_046474	SLC9A1	HL-60
chr1	27481344	27481848	27481596	55.5957	2.87696	prot	NR_046474	SLC9A1	PANC-1
chr1	27481412	27481756	27481584	81.5926	3.77151	prot	NR_046474	SLC9A1	PFSK-1
chr1	27481445	27481723	27481596	225.897	3.92174	prot	NR_046474	SLC9A1	HL-60
chr1	27481458	27481780	27481602	142.969	3.88906	prot	NR_046474	SLC9A1	A549
chr1	27481464	27481717	27481583	106.803	4.37049	prot	NR_046474	SLC9A1	Neuron
chr1	27481474	27481690	27481582	45.5158	4.2441	prot	NR_046474	SLC9A1	H1 ESC
chr1	27481510	27481608	27481593	103.359	4.84183	prot	NR_046474	SLC9A1	K562
chr1	27481538	27481699	27481621	105.672	4.31237	prot	NR_046474	SLC9A1	SK-N-SH
chr1	27648579	27648739	27648677	56.6921	4.22383	prot	NR_037580	TMEM222	T cell
chr1	27700761	27701251	27701006	89.2409	4.37049	prot	NM_003665	FCN3	Neuron
chr1	27706792	27707008	27706900	44.5597	4.2441	intron	NM_207397	CD164L2	H1 ESC
chr1	27814943	27815217	27815092	146.73	4.0491	intron	NM_006990	WASF2	ECC-1
chr1	27814961	27815201	27815068	119.357	3.68797	intron	NM_006990	WASF2	PANC-1
chr1	27814962	27815202	27815082	75.7934	2.7018	intron	NM_006990	WASF2	HeLa S3
chr1	27814977	27815230	27815091	164.027	3.92174	intron	NM_006990	WASF2	HL-60
chr1	27814996	27815166	27815084	169.246	4.84183	intron	NM_006990	WASF2	K562
chr1	27815005	27815329	27815167	60.1805	4.22383	intron	NM_006990	WASF2	T cell
chr1	27815040	27815119	27815084	99.1382	4.2441	intron	NM_006990	WASF2	H1 ESC
chr1	27815051	27815150	27815085	78.2741	4.31237	intron	NM_006990	WASF2	SK-N-SH
chr1	27816348	27816864	27816606	99.9406	3.92174	prot	NM_006990	WASF2	HL-60
chr1	27823369	27823640	27823502	174.157	4.37049	distal	NM_006990	WASF2	Neuron
chr1	27869197	27869333	27869252	205.889	4.84183	intron	NM_001029882	AHDC1	K562
chr1	27879558	27879732	27879671	138.747	4.2441	exon	NM_001029882	AHDC1	H1 ESC
chr1	27930376	27930866	27930621	74.6466	4.37049	prot	NM_001029882	AHDC1	Neuron
chr1	28099678	28099963	28099808	110.252	4.37049	prot	NM_177424	STX12	Neuron
chr1	28157102	28157606	28157354	39.7424	2.01069	prot	NM_014110	PPP1R8	PANC-1
chr1	28157222	28157527	28157390	97.9787	4.37049	prot	NM_014110	PPP1R8	Neuron
chr1	28157324	28157484	28157365	111.658	3.92174	prot	NM_014110	PPP1R8	HL-60
chr1	28193868	28193965	28193930	110.939	4.84183	distal	NM_001039477	THEMIS2	K562
chr1	28267470	28267686	28267578	76.0385	4.84183	intron	NM_014474	SMPDL3B	K562
chr1	28267486	28267702	28267594	79.6186	4.2441	intron	NM_014474	SMPDL3B	H1 ESC
chr1	28306160	28306376	28306268	101.395	4.84183	intron	NM_001990	EYA3	K562
chr1	28318795	28318956	28318816	122.257	4.22383	intron	NM_001990	EYA3	T cell
chr1	28559353	28559520	28559457	103.928	4.37049	prot	NM_014280	DNAJC8	Neuron
chr1	28562599	28562865	28562716	118.283	4.37049	prot	NM_016311	ATPIF1	Neuron
chr1	28570633	28570957	28570795	47.8688	4.22383	distal	NM_016311	ATPIF1	T cell
chr1	28585824	28586314	28586069	86.4793	4.37049	prot	NM_031459	SESN2	Neuron
chr1	28585874	28586218	28586046	60.3395	3.77151	prot	NM_031459	SESN2	PFSK-1
chr1	28593442	28593658	28593550	93.6281	4.84183	intron	NM_031459	SESN2	K562
chr1	28697654	28697725	28697672	118.454	4.84183	intron	NM_001048183	PHACTR4	K562
chr1	28832337	28832841	28832589	53.1224	2.77807	prot	NR_036473|NM_001048199	SNHG3|RCC1	PANC-1
chr1	28832435	28832758	28832586	163.71	3.88906	prot	NM_001048199|NR_036473	RCC1|SNHG3	A549
chr1	28832482	28832714	28832592	203.257	3.92174	prot	NR_036473|NM_001048199	SNHG3|RCC1	HL-60
chr1	28832484	28832700	28832592	36.4413	4.2441	prot	NM_001048199|NR_036473	RCC1|SNHG3	H1 ESC
chr1	28832502	28832681	28832592	95.0426	4.31237	prot	NR_036473|NM_001048199	SNHG3|RCC1	SK-N-SH
chr1	28832529	28832635	28832587	114.177	4.84183	prot	NR_036473|NM_001048199	SNHG3|RCC1	K562
chr1	28908171	28908491	28908337	170.79	4.37049	prot	NR_024127	SNHG12	Neuron
chr1	28908174	28908473	28908346	264.343	3.92174	prot	NR_024127	SNHG12	HL-60
chr1	28908185	28908503	28908352	168.138	3.88906	prot	NR_024127	SNHG12	A549
chr1	28908200	28908544	28908372	48.6473	3.36443	prot	NR_024127	SNHG12	PFSK-1
chr1	28908242	28908458	28908350	77.7163	4.84183	prot	NR_024127	SNHG12	K562
chr1	28908250	28908466	28908358	41.6339	4.2441	prot	NR_024127	SNHG12	H1 ESC
chr1	28908275	28908433	28908348	82.2318	4.31237	prot	NR_024127	SNHG12	SK-N-SH
chr1	28969430	28969602	28969511	93.7692	4.37049	prot	NM_005644	TAF12	Neuron
chr1	28975031	28975371	28975211	169.216	3.88906	prot	NR_004407	RNU11	A549
chr1	28975047	28975294	28975171	107.209	4.31237	prot	NR_004407	RNU11	SK-N-SH
chr1	28975150	28975253	28975173	97.6933	4.84183	prot	NR_004407	RNU11	K562
chr1	29045157	29045356	29045256	265.71	4.84183	distal	NM_001173128	YTHDF2	K562
chr1	29045189	29045318	29045251	152.076	4.2441	distal	NM_001173128	YTHDF2	H1 ESC
chr1	29063365	29063533	29063454	76.3657	4.22383	prot	NM_001173128	YTHDF2	T cell
chr1	29063405	29063686	29063521	82.8263	4.37049	prot	NM_001173128	YTHDF2	Neuron
chr1	29210406	29210710	29210540	355.112	4.84183	prot	NM_203342	EPB41	K562
chr1	29211537	29211640	29211638	110.623	4.84183	prot	NM_203342	EPB41	K562
chr1	29241166	29241515	29241322	508.397	4.22383	exon	NM_203342	EPB41	T cell
chr1	29241216	29241476	29241346	45.5501	1.35861	exon	NM_203342	EPB41	Hep G2
chr1	29241250	29241422	29241339	138.924	4.84183	exon	NM_203342	EPB41	K562
chr1	29483527	29483583	29483565	86.2038	4.84183	intron	NM_005626	SRSF4	K562
chr1	29681827	29682317	29682072	88.6766	4.37049	distal	NM_133177	PTPRU	Neuron
chr1	29792219	29792690	29792472	1489.76	4.0491	inter	none	NA	ECC-1
chr1	29792259	29792685	29792484	1071.18	3.92174	inter	none	NA	HL-60
chr1	29792270	29792660	29792477	358.689	3.68797	inter	none	NA	PANC-1
chr1	29792278	29792667	29792479	1151.46	4.08618	inter	none	NA	MCF-7
chr1	29792284	29792627	29792489	355.661	4.22383	inter	none	NA	T cell
chr1	29792289	29792669	29792474	257.517	3.88906	inter	none	NA	A549
chr1	29792305	29792651	29792481	1197.68	3.58512	inter	none	NA	HCT-116
chr1	29792327	29792625	29792477	325.818	3.77151	inter	none	NA	PFSK-1
chr1	29792343	29792621	29792488	2196.01	4.84183	inter	none	NA	K562
chr1	29792344	29792619	29792488	1155.96	3.65137	inter	none	NA	Hep G2
chr1	29792347	29792611	29792473	1139.58	3.55376	inter	none	NA	HeLa S3
chr1	29792349	29792603	29792473	1588.23	4.2441	inter	none	NA	H1 ESC
chr1	29792354	29792624	29792490	359.878	3.59073	inter	none	NA	U87
chr1	29792375	29792597	29792488	529.393	3.70372	inter	none	NA	GM12878
chr1	29792379	29792606	29792486	197.333	4.31237	inter	none	NA	SK-N-SH
chr1	29805002	29805272	29805137	119.841	3.70372	inter	none	NA	GM12878
chr1	29805008	29805305	29805177	734.673	4.2441	inter	none	NA	H1 ESC
chr1	29805037	29805245	29805120	88.9655	4.0491	inter	none	NA	ECC-1
chr1	29805078	29805209	29805145	173.024	4.84183	inter	none	NA	K562
chr1	29805092	29805203	29805148	120.472	3.65137	inter	none	NA	Hep G2
chr1	29805111	29805211	29805166	67.4428	3.12808	inter	none	NA	U87
chr1	30126275	30126705	30126494	483.771	4.0491	inter	none	NA	ECC-1
chr1	30126322	30126646	30126489	189.139	4.08618	inter	none	NA	MCF-7
chr1	30126331	30126643	30126500	218.428	3.92174	inter	none	NA	HL-60
chr1	30126352	30126635	30126488	124.243	3.88906	inter	none	NA	A549
chr1	30126367	30126620	30126501	822.585	4.2441	inter	none	NA	H1 ESC
chr1	30126376	30126632	30126499	774.273	4.84183	inter	none	NA	K562
chr1	30126380	30126588	30126490	141.395	3.58512	inter	none	NA	HCT-116
chr1	30126380	30126607	30126498	251.688	3.14809	inter	none	NA	HeLa S3
chr1	30126388	30126575	30126486	125.928	4.31237	inter	none	NA	SK-N-SH
chr1	30126388	30126578	30126481	333.163	3.70372	inter	none	NA	GM12878
chr1	30126398	30126610	30126486	110.641	3.68797	inter	none	NA	PANC-1
chr1	30126428	30126520	30126491	85.4569	3.65137	inter	none	NA	Hep G2
chr1	30126472	30126567	30126479	72.175	3.59073	inter	none	NA	U87
chr1	30209367	30209928	30209622	2292.76	3.92174	inter	none	NA	HL-60
chr1	30209384	30210063	30209630	1959.96	4.0491	inter	none	NA	ECC-1
chr1	30209401	30209897	30209634	795.59	3.88906	inter	none	NA	A549
chr1	30209422	30209855	30209639	617.136	3.68797	inter	none	NA	PANC-1
chr1	30209431	30209859	30209633	1230.68	4.08618	inter	none	NA	MCF-7
chr1	30209444	30209838	30209633	1112.97	3.77151	inter	none	NA	PFSK-1
chr1	30209447	30209845	30209635	1481.38	3.58512	inter	none	NA	HCT-116
chr1	30209461	30209790	30209633	463.331	4.22383	inter	none	NA	T cell
chr1	30209473	30209841	30209620	711.925	3.59073	inter	none	NA	U87
chr1	30209480	30209819	30209630	1079.42	4.31237	inter	none	NA	SK-N-SH
chr1	30209487	30209779	30209631	1678.18	3.55376	inter	none	NA	HeLa S3
chr1	30209488	30209777	30209628	2945.49	4.2441	inter	none	NA	H1 ESC
chr1	30209490	30209769	30209625	2904.85	4.84183	inter	none	NA	K562
chr1	30209496	30209769	30209625	741.206	3.65137	inter	none	NA	Hep G2
chr1	30209507	30209759	30209625	718.313	3.70372	inter	none	NA	GM12878
chr1	30224896	30225380	30225153	1035.46	4.0491	inter	none	NA	ECC-1
chr1	30224961	30225282	30225158	160.363	3.88906	inter	none	NA	A549
chr1	30224966	30225321	30225140	484.2	4.08618	inter	none	NA	MCF-7
chr1	30224982	30225316	30225153	286.632	3.92174	inter	none	NA	HL-60
chr1	30225002	30225282	30225148	299.71	3.58512	inter	none	NA	HCT-116
chr1	30225010	30225293	30225145	3224.47	4.2441	inter	none	NA	H1 ESC
chr1	30225014	30225278	30225150	280.143	3.77151	inter	none	NA	PFSK-1
chr1	30225019	30225271	30225143	1233.64	4.84183	inter	none	NA	K562
chr1	30225020	30225272	30225151	396.951	3.65137	inter	none	NA	Hep G2
chr1	30225023	30225277	30225145	364.809	4.31237	inter	none	NA	SK-N-SH
chr1	30225026	30225211	30225138	120.745	3.68797	inter	none	NA	PANC-1
chr1	30225040	30225266	30225149	324.199	3.08481	inter	none	NA	HeLa S3
chr1	30225047	30225249	30225152	400.602	3.70372	inter	none	NA	GM12878
chr1	30225049	30225244	30225145	166.895	3.59073	inter	none	NA	U87
chr1	30404331	30404518	30404429	114.97	4.37049	inter	none	NA	Neuron
chr1	30422440	30422944	30422692	47.9107	2.71517	inter	none	NA	PANC-1
chr1	30422536	30422907	30422725	383.099	4.0491	inter	none	NA	ECC-1
chr1	30422560	30422870	30422712	200.94	4.08618	inter	none	NA	MCF-7
chr1	30422565	30422859	30422710	351.459	3.58512	inter	none	NA	HCT-116
chr1	30422588	30422839	30422704	575.408	4.2441	inter	none	NA	H1 ESC
chr1	30422589	30422829	30422709	84.3873	2.81224	inter	none	NA	HeLa S3
chr1	30422609	30422803	30422716	91.3173	3.77151	inter	none	NA	PFSK-1
chr1	30422636	30422814	30422725	134.42	3.65137	inter	none	NA	Hep G2
chr1	30422705	30422765	30422707	89.5062	4.84183	inter	none	NA	K562
chr1	30447820	30448369	30448133	1861.65	3.92174	inter	none	NA	HL-60
chr1	30447837	30448383	30448126	1711.67	4.0491	inter	none	NA	ECC-1
chr1	30447842	30448381	30448126	957.288	3.88906	inter	none	NA	A549
chr1	30447851	30448386	30448132	919.179	3.68797	inter	none	NA	PANC-1
chr1	30447856	30448437	30448124	1752.78	4.22383	inter	none	NA	T cell
chr1	30447887	30448317	30448122	1916.09	3.77151	inter	none	NA	PFSK-1
chr1	30447906	30448332	30448134	1111.25	4.08618	inter	none	NA	MCF-7
chr1	30447939	30448310	30448133	1406.72	3.58512	inter	none	NA	HCT-116
chr1	30447962	30448274	30448111	362.102	3.59073	inter	none	NA	U87
chr1	30447974	30448285	30448130	757.067	4.31237	inter	none	NA	SK-N-SH
chr1	30447977	30448278	30448124	2997.41	4.2441	inter	none	NA	H1 ESC
chr1	30447983	30448277	30448126	1337.65	3.55376	inter	none	NA	HeLa S3
chr1	30447991	30448267	30448140	942.051	3.65137	inter	none	NA	Hep G2
chr1	30447992	30448271	30448131	2241.81	4.84183	inter	none	NA	K562
chr1	30447998	30448256	30448136	922.678	3.70372	inter	none	NA	GM12878
chr1	30657522	30657598	30657587	98.1157	4.84183	inter	none	NA	K562
chr1	30709517	30709733	30709625	44.3074	4.2441	inter	none	NA	H1 ESC
chr1	30709529	30709769	30709649	70.9867	2.7185	inter	none	NA	HeLa S3
chr1	30737288	30737504	30737396	76.5823	4.2441	inter	none	NA	H1 ESC
chr1	30749046	30749567	30749285	535.804	4.37049	inter	none	NA	Neuron
chr1	30815324	30815824	30815574	55.6941	4.0491	inter	none	NA	ECC-1
chr1	30815449	30815719	30815584	121.225	3.70372	inter	none	NA	GM12878
chr1	30815451	30815720	30815556	575.826	4.2441	inter	none	NA	H1 ESC
chr1	30815465	30815617	30815585	73.2099	3.77151	inter	none	NA	PFSK-1
chr1	30815531	30815635	30815579	92.305	4.84183	inter	none	NA	K562
chr1	30838533	30838675	30838606	60.406	3.77151	inter	none	NA	PFSK-1
chr1	30838554	30838704	30838622	177.558	4.2441	inter	none	NA	H1 ESC
chr1	30838573	30838682	30838628	84.865	2.81103	inter	none	NA	HeLa S3
chr1	31084716	31085194	31084970	1009.4	4.0491	inter	none	NA	ECC-1
chr1	31084764	31085168	31084974	875.37	3.92174	inter	none	NA	HL-60
chr1	31084792	31085171	31084977	161.642	3.88906	inter	none	NA	A549
chr1	31084797	31085147	31084967	459.573	4.08618	inter	none	NA	MCF-7
chr1	31084813	31085099	31084945	322.274	3.77151	inter	none	NA	PFSK-1
chr1	31084814	31085120	31084969	357.639	3.58512	inter	none	NA	HCT-116
chr1	31084831	31085098	31084981	1572.11	4.2441	inter	none	NA	H1 ESC
chr1	31084834	31085095	31084975	1140.21	4.84183	inter	none	NA	K562
chr1	31084843	31085095	31084962	662.847	3.55376	inter	none	NA	HeLa S3
chr1	31084847	31085034	31084937	122.52	3.59073	inter	none	NA	U87
chr1	31084848	31085140	31084983	210.851	3.68797	inter	none	NA	PANC-1
chr1	31084853	31085065	31084957	429.912	3.70372	inter	none	NA	GM12878
chr1	31084868	31085013	31084936	66.9359	4.22383	inter	none	NA	T cell
chr1	31084870	31085064	31084964	180.768	3.65137	inter	none	NA	Hep G2
chr1	31084885	31085035	31084962	86.3395	4.31237	inter	none	NA	SK-N-SH
chr1	31191483	31191807	31191645	39.4897	4.22383	prot	NR_034182	MATN1-AS1	T cell
chr1	31191541	31191757	31191649	86.7057	4.84183	prot	NR_034182	MATN1-AS1	K562
chr1	31241848	31242056	31241955	282.849	4.84183	distal	NM_006762	LAPTM5	K562
chr1	31289138	31289396	31289273	135.753	4.37049	inter	none	NA	Neuron
chr1	31331621	31332115	31331886	1128.39	4.0491	distal	NM_014654	SDC3	ECC-1
chr1	31331661	31332122	31331888	537.154	3.88906	distal	NM_014654	SDC3	A549
chr1	31331664	31332093	31331885	997.275	3.92174	distal	NM_014654	SDC3	HL-60
chr1	31331681	31332094	31331890	1777.95	3.59073	distal	NM_014654	SDC3	U87
chr1	31331707	31332057	31331885	917	3.77151	distal	NM_014654	SDC3	PFSK-1
chr1	31331708	31332060	31331885	580.234	4.08618	distal	NM_014654	SDC3	MCF-7
chr1	31331711	31332049	31331883	1868.66	4.31237	distal	NM_014654	SDC3	SK-N-SH
chr1	31331713	31332052	31331884	807.119	3.58512	distal	NM_014654	SDC3	HCT-116
chr1	31331726	31332034	31331887	2804.38	4.84183	distal	NM_014654	SDC3	K562
chr1	31331741	31332028	31331892	2508.15	4.2441	distal	NM_014654	SDC3	H1 ESC
chr1	31331743	31332031	31331893	1176.62	3.55376	distal	NM_014654	SDC3	HeLa S3
chr1	31331743	31332059	31331888	318.031	3.68797	distal	NM_014654	SDC3	PANC-1
chr1	31331744	31332068	31331906	45.0409	4.22383	distal	NM_014654	SDC3	T cell
chr1	31331754	31332016	31331882	554.581	3.65137	distal	NM_014654	SDC3	Hep G2
chr1	31331763	31331998	31331884	553.091	3.70372	distal	NM_014654	SDC3	GM12878
chr1	31453979	31454495	31454237	86.2045	3.92174	exon	NM_014676	PUM1	HL-60
chr1	31538137	31538737	31538437	87.7138	3.88906	prot	NM_014676	PUM1	A549
chr1	31538194	31538585	31538441	207.67	4.37049	prot	NM_014676	PUM1	Neuron
chr1	31538222	31538738	31538480	105.882	3.92174	prot	NM_014676	PUM1	HL-60
chr1	31627564	31627715	31627594	74.3985	4.37049	distal	NM_024522	NKAIN1	Neuron
chr1	31653143	31653647	31653395	41.7618	2.14315	exon	NM_024522	NKAIN1	PANC-1
chr1	31653315	31653516	31653427	74.9576	4.0491	exon	NM_024522	NKAIN1	ECC-1
chr1	31653334	31653503	31653409	106.618	4.31237	exon	NM_024522	NKAIN1	SK-N-SH
chr1	31653355	31653459	31653424	105.775	4.84183	exon	NM_024522	NKAIN1	K562
chr1	31654306	31654682	31654494	38.8671	1.04121	exon	NM_024522	NKAIN1	HCT-116
chr1	31654324	31654812	31654484	164.97	4.22383	exon	NM_024522	NKAIN1	T cell
chr1	31654344	31654614	31654479	84.9992	3.23342	exon	NM_024522	NKAIN1	GM12878
chr1	31654350	31654566	31654458	47.4799	4.2441	exon	NM_024522	NKAIN1	H1 ESC
chr1	31654355	31654577	31654468	280.239	3.65137	exon	NM_024522	NKAIN1	Hep G2
chr1	31654866	31655745	31655331	7045.58	4.22383	exon	NM_024522	NKAIN1	T cell
chr1	31654910	31655677	31655327	3398.45	4.0491	exon	NM_024522	NKAIN1	ECC-1
chr1	31654926	31655713	31655326	4356.5	3.92174	exon	NM_024522	NKAIN1	HL-60
chr1	31654939	31655677	31655336	2057.74	3.88906	exon	NM_024522	NKAIN1	A549
chr1	31654987	31655680	31655336	1924.68	3.68797	exon	NM_024522	NKAIN1	PANC-1
chr1	31655094	31655539	31655327	8135.4	4.84183	exon	NM_024522	NKAIN1	K562
chr1	31655096	31655598	31655332	1618.29	4.08618	exon	NM_024522	NKAIN1	MCF-7
chr1	31655118	31655577	31655346	5407.18	3.59073	exon	NM_024522	NKAIN1	U87
chr1	31655125	31655578	31655331	2279.38	3.58512	exon	NM_024522	NKAIN1	HCT-116
chr1	31655138	31655563	31655336	4215.51	3.77151	exon	NM_024522	NKAIN1	PFSK-1
chr1	31655159	31655529	31655318	5017.76	3.65137	exon	NM_024522	NKAIN1	Hep G2
chr1	31655161	31655518	31655331	3889.54	3.55376	exon	NM_024522	NKAIN1	HeLa S3
chr1	31655162	31655520	31655314	1567.3	4.31237	exon	NM_024522	NKAIN1	SK-N-SH
chr1	31655176	31655473	31655329	3104.72	4.2441	exon	NM_024522	NKAIN1	H1 ESC
chr1	31655177	31655501	31655331	3244.07	3.70372	exon	NM_024522	NKAIN1	GM12878
chr1	31656807	31656949	31656876	44.3137	4.22383	exon	NM_024522	NKAIN1	T cell
chr1	31656810	31657186	31656998	27.369	0.39341	exon	NM_024522	NKAIN1	HCT-116
chr1	31656866	31657126	31656996	53.2692	1.76402	intron	NM_024522	NKAIN1	Hep G2
chr1	31656880	31657096	31656988	82.6471	4.84183	intron	NM_024522	NKAIN1	K562
chr1	31656881	31657097	31656989	49.9118	4.2441	intron	NM_024522	NKAIN1	H1 ESC
chr1	31769810	31770070	31769944	111.777	4.37049	prot	NM_016505	ZCCHC17	Neuron
chr1	31867812	31868156	31867984	62.2069	3.77151	distal	NM_001199038	SERINC2	PFSK-1
chr1	31867919	31868045	31867983	118.831	2.82456	distal	NM_001199038	SERINC2	HeLa S3
chr1	31887649	31887925	31887785	115.257	4.37049	intron	NM_001199038	SERINC2	Neuron
chr1	31904734	31905004	31904869	160.655	3.70372	intron	NM_001199038	SERINC2	GM12878
chr1	32089002	32089218	32089110	50.84	4.2441	exon	NM_001525	HCRTR1	H1 ESC
chr1	32089070	32089195	32089117	78.7585	4.0491	exon	NM_001525	HCRTR1	ECC-1
chr1	32110113	32110437	32110275	44.2124	4.22383	prot	NM_012392	PEF1	T cell
chr1	32110405	32110729	32110567	46.3236	4.22383	prot	NM_012392	PEF1	T cell
chr1	32111544	32111712	32111637	61.8343	4.22383	prot	NM_012392	PEF1	T cell
chr1	32155472	32155712	32155592	67.5987	2.67594	intron	NM_001856	COL16A1	HeLa S3
chr1	32155525	32155663	32155607	82.0677	4.31237	intron	NM_001856	COL16A1	SK-N-SH
chr1	32188276	32188600	32188438	49.5228	4.22383	distal	NM_001856	COL16A1	T cell
chr1	32188677	32189001	32188839	40.6079	4.22383	distal	NM_001856	COL16A1	T cell
chr1	32188929	32189189	32189059	49.2247	1.49641	distal	NM_001856	COL16A1	Hep G2
chr1	32189261	32189984	32189558	3451.89	4.0491	distal	NM_001856	COL16A1	ECC-1
chr1	32189286	32189974	32189558	4135.32	3.92174	distal	NM_001856	COL16A1	HL-60
chr1	32189289	32189827	32189558	1203.01	3.88906	distal	NM_001856	COL16A1	A549
chr1	32189300	32189970	32189545	3118.94	4.22383	distal	NM_001856	COL16A1	T cell
chr1	32189311	32189801	32189566	969.515	3.68797	distal	NM_001856	COL16A1	PANC-1
chr1	32189327	32189796	32189559	1737.32	4.08618	distal	NM_001856	COL16A1	MCF-7
chr1	32189343	32189746	32189546	2200.46	3.58512	distal	NM_001856	COL16A1	HCT-116
chr1	32189360	32189791	32189553	2328.65	3.77151	distal	NM_001856	COL16A1	PFSK-1
chr1	32189364	32189735	32189546	1534.4	3.59073	distal	NM_001856	COL16A1	U87
chr1	32189370	32189703	32189559	2718.74	4.31237	distal	NM_001856	COL16A1	SK-N-SH
chr1	32189395	32189714	32189555	3690.15	3.55376	distal	NM_001856	COL16A1	HeLa S3
chr1	32189397	32189693	32189552	3818.07	4.2441	distal	NM_001856	COL16A1	H1 ESC
chr1	32189398	32189696	32189546	2551.56	3.65137	distal	NM_001856	COL16A1	Hep G2
chr1	32189398	32189700	32189553	7631.26	4.84183	distal	NM_001856	COL16A1	K562
chr1	32189416	32189686	32189549	1463.42	3.70372	distal	NM_001856	COL16A1	GM12878
chr1	32229299	32229546	32229421	85.1827	4.22383	prot	NM_001703	BAI2	T cell
chr1	32292734	32292934	32292830	239.148	4.84183	distal	NM_144569	SPOCD1	K562
chr1	32421684	32421795	32421734	125.071	4.84183	distal	NM_080391	PTP4A2	K562
chr1	32480232	32480404	32480308	87.0294	4.37049	prot	NR_073499	KHDRBS1	Neuron
chr1	32503313	32503813	32503563	62.2962	4.0491	exon	NR_073499	KHDRBS1	ECC-1
chr1	32503452	32503692	32503572	65.7955	2.68215	exon	NR_073499	KHDRBS1	HeLa S3
chr1	32503470	32503686	32503578	76.1174	4.2441	exon	NR_073499	KHDRBS1	H1 ESC
chr1	32538214	32538354	32538311	77.1161	4.37049	prot	NM_018056	TMEM39B	Neuron
chr1	32599163	32599275	32599227	132.045	4.84183	intron	NM_012316	KPNA6	K562
chr1	32801671	32801959	32801803	146.729	4.37049	prot	NR_052852	MARCKSL1	Neuron
chr1	32856747	32856871	32856820	131.098	4.84183	intron	NM_001143889	BSDC1	K562
chr1	32860204	32860420	32860312	85.3339	4.84183	prot	NM_001143889	BSDC1	K562
chr1	32860376	32860664	32860556	125.878	4.37049	prot	NM_001143889	BSDC1	Neuron
chr1	32913575	32913791	32913683	36.5945	4.2441	distal	NM_001145720	ZBTB8B	H1 ESC
chr1	33116889	33117149	33117041	165.66	4.22383	prot	NM_001135255	RBBP4	T cell
chr1	33177826	33178150	33177988	37.3207	4.22383	distal	NM_030786	SYNC	T cell
chr1	33220564	33220790	33220685	80.2383	4.37049	intron	NM_020888	KIAA1522	Neuron
chr1	33220885	33221063	33220960	99.8214	4.37049	intron	NM_020888	KIAA1522	Neuron
chr1	33282696	33283020	33282858	40.7615	4.22383	prot	NM_001256121	S100PBP	T cell
chr1	33282772	33283116	33282944	48.4209	3.36692	prot	NM_001256121	S100PBP	PFSK-1
chr1	33282815	33283175	33282995	53.0766	2.72034	prot	NM_001256121	S100PBP	U87
chr1	33282923	33283059	33282992	79.6625	4.31237	prot	NM_001256121	S100PBP	SK-N-SH
chr1	33321571	33321787	33321679	81.5705	4.2441	exon	NM_001256121	S100PBP	H1 ESC
chr1	33351948	33352556	33352345	25057.8	4.84183	prot	NM_002143	HPCA	K562
chr1	33351958	33352700	33352345	7646.23	3.92174	prot	NM_002143	HPCA	HL-60
chr1	33351984	33352755	33352340	7467.31	4.0491	prot	NM_002143	HPCA	ECC-1
chr1	33351998	33352789	33352337	2966.52	3.88906	prot	NM_002143	HPCA	A549
chr1	33352033	33352685	33352331	2143.27	3.68797	prot	NM_002143	HPCA	PANC-1
chr1	33352047	33352591	33352346	4061.64	4.22383	prot	NM_002143	HPCA	T cell
chr1	33352058	33352589	33352340	2915.98	4.08618	prot	NM_002143	HPCA	MCF-7
chr1	33352082	33352565	33352334	6655.57	3.77151	prot	NM_002143	HPCA	PFSK-1
chr1	33352090	33352533	33352332	5573.39	4.31237	prot	NM_002143	HPCA	SK-N-SH
chr1	33352112	33352556	33352340	4609.89	3.58512	prot	NM_002143	HPCA	HCT-116
chr1	33352119	33352509	33352337	1539.45	3.59073	prot	NM_002143	HPCA	U87
chr1	33352119	33352513	33352340	7847.27	3.65137	prot	NM_002143	HPCA	Hep G2
chr1	33352144	33352508	33352348	7475.47	4.2441	prot	NM_002143	HPCA	H1 ESC
chr1	33352147	33352496	33352340	2617.21	3.70372	prot	NM_002143	HPCA	GM12878
chr1	33352155	33352481	33352338	892.668	3.55376	prot	NM_002143	HPCA	HeLa S3
chr1	33429279	33429639	33429459	62.6439	3.14891	prot	NM_153341	RNF19B	U87
chr1	33429282	33429564	33429433	126.07	4.0491	prot	NM_153341	RNF19B	ECC-1
chr1	33429298	33429567	33429422	159.723	3.92174	prot	NM_153341	RNF19B	HL-60
chr1	33429304	33429544	33429424	89.7448	2.88379	prot	NM_153341	RNF19B	HeLa S3
chr1	33429324	33429522	33429438	146.012	4.31237	prot	NM_153341	RNF19B	SK-N-SH
chr1	33429325	33429533	33429433	92.7971	4.08618	prot	NM_153341	RNF19B	MCF-7
chr1	33429343	33429570	33429464	135.995	4.22383	prot	NM_153341	RNF19B	T cell
chr1	33429349	33429518	33429447	99.8885	3.77151	prot	NM_153341	RNF19B	PFSK-1
chr1	33429356	33429496	33429413	142.585	4.2441	prot	NM_153341	RNF19B	H1 ESC
chr1	33429373	33429478	33429416	101.784	4.84183	prot	NM_153341	RNF19B	K562
chr1	33438541	33438868	33438697	159.881	4.37049	distal	NM_153341	RNF19B	Neuron
chr1	33532184	33532400	33532292	36.4084	4.2441	distal	NM_052998	ADC	H1 ESC
chr1	33546297	33546787	33546542	73.7624	4.37049	prot	NM_052998	ADC	Neuron
chr1	33592536	33593052	33592794	87.8617	3.92174	distal	NM_052998	ADC	HL-60
chr1	33605556	33606060	33605808	38.613	1.97839	distal	NM_018207	TRIM62	PANC-1
chr1	33605653	33606029	33605841	52.4209	1.77686	distal	NM_018207	TRIM62	HCT-116
chr1	33605667	33606012	33605834	285.082	4.0491	distal	NM_018207	TRIM62	ECC-1
chr1	33605680	33605981	33605829	203.886	4.08618	distal	NM_018207	TRIM62	MCF-7
chr1	33605720	33605957	33605839	672.364	3.55376	distal	NM_018207	TRIM62	HeLa S3
chr1	33605722	33605944	33605833	126.513	3.77151	distal	NM_018207	TRIM62	PFSK-1
chr1	33605724	33605952	33605853	252.74	3.59073	distal	NM_018207	TRIM62	U87
chr1	33605725	33605942	33605829	371.226	4.2441	distal	NM_018207	TRIM62	H1 ESC
chr1	33605728	33605944	33605834	369.441	4.84183	distal	NM_018207	TRIM62	K562
chr1	33605730	33605928	33605827	117.275	3.92174	distal	NM_018207	TRIM62	HL-60
chr1	33605731	33605936	33605838	202.826	4.31237	distal	NM_018207	TRIM62	SK-N-SH
chr1	33605743	33605902	33605817	146.512	3.65137	distal	NM_018207	TRIM62	Hep G2
chr1	33647452	33647716	33647585	223.134	4.22383	prot	NM_018207	TRIM62	T cell
chr1	33654397	33654524	33654448	108.398	2.84475	distal	NM_018207	TRIM62	HeLa S3
chr1	33687162	33687378	33687270	36.7186	4.2441	distal	NM_152493	ZNF362	H1 ESC
chr1	33858236	33858547	33858380	192.905	4.37049	distal	NM_198040	PHC2	Neuron
chr1	33875544	33876134	33875744	752.925	4.37049	distal	NM_198040	PHC2	Neuron
chr1	33899038	33899262	33899139	96.7408	4.37049	distal	NM_145238	ZSCAN20	Neuron
chr1	34101284	34101500	34101392	36.6868	4.2441	intron	NM_052896	CSMD2	H1 ESC
chr1	34319774	34320015	34319881	682.612	4.2441	intron	NM_052896	CSMD2	H1 ESC
chr1	34319778	34320003	34319911	94.3208	4.0491	intron	NM_052896	CSMD2	ECC-1
chr1	34319797	34319912	34319881	71.6466	3.77151	intron	NM_052896	CSMD2	PFSK-1
chr1	34319812	34319951	34319878	83.6804	3.44483	intron	NM_052896	CSMD2	HL-60
chr1	34345812	34346316	34346064	64.7101	3.68797	intron	NM_052896|NR_038372	CSMD2|LOC402779	PANC-1
chr1	34345867	34346243	34346055	42.082	1.25005	intron	NM_052896|NR_038372	CSMD2|LOC402779	HCT-116
chr1	34345882	34346214	34346058	267.137	4.0491	intron	NR_038372|NM_052896	CSMD2|LOC402779	ECC-1
chr1	34345885	34346245	34346065	53.274	2.82838	intron	NM_052896|NR_038372	CSMD2|LOC402779	U87
chr1	34345908	34346210	34346063	169.001	3.92174	intron	NR_038372|NM_052896	CSMD2|LOC402779	HL-60
chr1	34345910	34346224	34346071	212.212	4.08618	intron	NR_038372|NM_052896	CSMD2|LOC402779	MCF-7
chr1	34345936	34346218	34346068	216.04	3.77151	intron	NM_052896|NR_038372	CSMD2|LOC402779	PFSK-1
chr1	34345961	34346176	34346070	440.114	4.2441	intron	NM_052896|NR_038372	CSMD2|LOC402779	H1 ESC
chr1	34345961	34346201	34346081	64.8379	2.68553	intron	NR_038372|NM_052896	CSMD2|LOC402779	HeLa S3
chr1	34345990	34346136	34346077	117.94	4.84183	intron	NM_052896|NR_038372	CSMD2|LOC402779	K562
chr1	34442669	34442816	34442749	142.995	4.2441	intron	NM_052896	CSMD2	H1 ESC
chr1	34499571	34500087	34499829	89.5611	3.92174	intron	NM_052896	CSMD2	HL-60
chr1	34499648	34500024	34499836	37.1757	0.949698	intron	NM_052896	CSMD2	HCT-116
chr1	34499672	34499980	34499837	174.166	4.0491	intron	NM_052896	CSMD2	ECC-1
chr1	34499678	34499980	34499823	210.078	4.08618	intron	NM_052896	CSMD2	MCF-7
chr1	34499686	34499956	34499821	85.6896	3.23206	intron	NM_052896	CSMD2	GM12878
chr1	34499706	34499953	34499820	961.392	4.2441	intron	NM_052896	CSMD2	H1 ESC
chr1	34499725	34499917	34499822	250.879	4.84183	intron	NM_052896	CSMD2	K562
chr1	34499740	34499893	34499822	138.237	2.9041	intron	NM_052896	CSMD2	HeLa S3
chr1	34573905	34574281	34574093	30.8624	0.597271	intron	NM_052896	CSMD2	HCT-116
chr1	34573962	34574275	34574111	230.183	4.08618	intron	NM_052896	CSMD2	MCF-7
chr1	34573981	34574221	34574101	67.1242	2.67723	intron	NM_052896	CSMD2	HeLa S3
chr1	34574009	34574225	34574104	83.4558	4.0491	intron	NM_052896	CSMD2	ECC-1
chr1	34574012	34574194	34574106	230.888	4.2441	intron	NM_052896	CSMD2	H1 ESC
chr1	34574074	34574148	34574106	93.5965	4.84183	intron	NM_052896	CSMD2	K562
chr1	34612456	34612579	34612514	125.945	4.2441	intron	NM_052896	CSMD2	H1 ESC
chr1	34612456	34612613	34612524	64.1881	4.0491	intron	NM_052896	CSMD2	ECC-1
chr1	34643612	34644116	34643864	64.3953	3.68797	exon	NM_032884	C1orf94	PANC-1
chr1	34643749	34643999	34643867	120.342	4.0491	intron	NM_032884	C1orf94	ECC-1
chr1	34643757	34643972	34643860	87.2936	4.08618	intron	NM_032884	C1orf94	MCF-7
chr1	34643762	34643983	34643873	365.551	4.2441	intron	NM_032884	C1orf94	H1 ESC
chr1	34643763	34643979	34643871	87.2537	4.84183	intron	NM_032884	C1orf94	K562
chr1	34655286	34655447	34655378	134.977	3.59073	intron	NM_032884	C1orf94	U87
chr1	34731600	34731816	34731708	59.671	4.2441	distal	NM_032884	C1orf94	H1 ESC
chr1	34786432	34786648	34786540	56.4096	4.2441	inter	none	NA	H1 ESC
chr1	34807414	34807904	34807659	84.6776	4.37049	inter	none	NA	Neuron
chr1	34867324	34867540	34867432	40.3557	4.2441	inter	none	NA	H1 ESC
chr1	34944288	34944664	34944476	56.0943	1.95598	inter	none	NA	HCT-116
chr1	34944326	34944624	34944479	200.53	4.0491	inter	none	NA	ECC-1
chr1	34944347	34944627	34944480	179.103	4.08618	inter	none	NA	MCF-7
chr1	34944355	34944601	34944481	620.501	4.2441	inter	none	NA	H1 ESC
chr1	34944377	34944593	34944485	78.5095	4.84183	inter	none	NA	K562
chr1	34966008	34966476	34966243	2413.42	3.92174	inter	none	NA	HL-60
chr1	34966011	34966528	34966236	2206.07	4.0491	inter	none	NA	ECC-1
chr1	34966023	34966439	34966235	1534.62	4.08618	inter	none	NA	MCF-7
chr1	34966038	34966443	34966236	376.367	3.68797	inter	none	NA	PANC-1
chr1	34966041	34966424	34966233	264.596	3.88906	inter	none	NA	A549
chr1	34966077	34966411	34966241	1092.69	3.58512	inter	none	NA	HCT-116
chr1	34966082	34966401	34966239	2032.04	3.59073	inter	none	NA	U87
chr1	34966084	34966400	34966241	1166.58	3.77151	inter	none	NA	PFSK-1
chr1	34966084	34966426	34966247	666.329	4.22383	inter	none	NA	T cell
chr1	34966093	34966383	34966238	2918.97	3.65137	inter	none	NA	Hep G2
chr1	34966101	34966373	34966233	1860.98	3.70372	inter	none	NA	GM12878
chr1	34966102	34966375	34966235	1989.18	4.84183	inter	none	NA	K562
chr1	34966102	34966378	34966238	1367.12	3.55376	inter	none	NA	HeLa S3
chr1	34966102	34966387	34966250	3026.62	4.2441	inter	none	NA	H1 ESC
chr1	34966167	34966299	34966239	90.917	4.31237	inter	none	NA	SK-N-SH
chr1	35175085	35175549	35175336	1012.76	4.0491	distal	hsa-mir-552	hsa-mir-552	ECC-1
chr1	35175129	35175532	35175342	920.31	3.92174	distal	hsa-mir-552	hsa-mir-552	HL-60
chr1	35175146	35175511	35175338	552.757	4.08618	distal	hsa-mir-552	hsa-mir-552	MCF-7
chr1	35175153	35175491	35175337	181.842	3.88906	distal	hsa-mir-552	hsa-mir-552	A549
chr1	35175179	35175520	35175346	226.229	3.68797	distal	hsa-mir-552	hsa-mir-552	PANC-1
chr1	35175202	35175458	35175342	1123.68	4.84183	distal	hsa-mir-552	hsa-mir-552	K562
chr1	35175202	35175464	35175341	929.283	3.55376	distal	hsa-mir-552	hsa-mir-552	HeLa S3
chr1	35175204	35175473	35175342	274.98	3.58512	distal	hsa-mir-552	hsa-mir-552	HCT-116
chr1	35175207	35175462	35175335	1184.2	4.2441	distal	hsa-mir-552	hsa-mir-552	H1 ESC
chr1	35175210	35175468	35175341	230.834	4.22383	distal	hsa-mir-552	hsa-mir-552	T cell
chr1	35175212	35175447	35175336	584.598	3.70372	distal	hsa-mir-552	hsa-mir-552	GM12878
chr1	35175217	35175448	35175338	305.468	3.65137	distal	hsa-mir-552	hsa-mir-552	Hep G2
chr1	35175239	35175441	35175326	130.571	3.59073	distal	hsa-mir-552	hsa-mir-552	U87
chr1	35175243	35175420	35175321	85.7934	3.77151	distal	hsa-mir-552	hsa-mir-552	PFSK-1
chr1	35309330	35309497	35309419	153.917	4.84183	distal	NM_138428	SMIM12	K562
chr1	35372985	35373580	35373275	2463.42	4.0491	prot	NM_001080418	DLGAP3	ECC-1
chr1	35373026	35373508	35373268	509.265	3.88906	prot	NM_001080418	DLGAP3	A549
chr1	35373030	35373586	35373278	1868.08	3.92174	prot	NM_001080418	DLGAP3	HL-60
chr1	35373037	35373507	35373272	632.748	3.68797	prot	NM_001080418	DLGAP3	PANC-1
chr1	35373066	35373499	35373278	1011.56	4.08618	prot	NM_001080418	DLGAP3	MCF-7
chr1	35373076	35373508	35373260	741.053	4.22383	prot	NM_001080418	DLGAP3	T cell
chr1	35373092	35373483	35373273	858.031	3.58512	prot	NM_001080418	DLGAP3	HCT-116
chr1	35373104	35373431	35373262	322.792	3.77151	prot	NM_001080418	DLGAP3	PFSK-1
chr1	35373113	35373395	35373258	277.466	3.59073	prot	NM_001080418	DLGAP3	U87
chr1	35373115	35373417	35373273	3635.46	4.84183	prot	NM_001080418	DLGAP3	K562
chr1	35373117	35373433	35373267	708.535	4.31237	prot	NM_001080418	DLGAP3	SK-N-SH
chr1	35373133	35373422	35373268	2331.8	4.2441	prot	NM_001080418	DLGAP3	H1 ESC
chr1	35373142	35373416	35373278	1238.57	3.55376	prot	NM_001080418	DLGAP3	HeLa S3
chr1	35373156	35373397	35373274	428.634	3.65137	prot	NM_001080418	DLGAP3	Hep G2
chr1	35373158	35373391	35373273	657.173	3.70372	prot	NM_001080418	DLGAP3	GM12878
chr1	35390146	35390885	35390596	2593.78	3.88906	distal	NM_001080418	DLGAP3	A549
chr1	35390155	35390884	35390610	6331.12	4.0491	distal	NM_001080418	DLGAP3	ECC-1
chr1	35390200	35390873	35390610	7448.64	3.92174	distal	NM_001080418	DLGAP3	HL-60
chr1	35390254	35390821	35390588	4676.52	4.22383	distal	NM_001080418	DLGAP3	T cell
chr1	35390294	35390857	35390600	2132.89	3.68797	distal	NM_001080418	DLGAP3	PANC-1
chr1	35390353	35390829	35390602	2790.54	4.08618	distal	NM_001080418	DLGAP3	MCF-7
chr1	35390365	35390791	35390613	7177.77	3.77151	distal	NM_001080418	DLGAP3	PFSK-1
chr1	35390380	35390789	35390614	4393.68	3.59073	distal	NM_001080418	DLGAP3	U87
chr1	35390383	35390792	35390610	3988.79	3.58512	distal	NM_001080418	DLGAP3	HCT-116
chr1	35390397	35390790	35390602	16672.3	4.84183	distal	NM_001080418	DLGAP3	K562
chr1	35390402	35390773	35390606	7017.8	3.55376	distal	NM_001080418	DLGAP3	HeLa S3
chr1	35390410	35390786	35390610	6091.47	4.31237	distal	NM_001080418	DLGAP3	SK-N-SH
chr1	35390421	35390770	35390607	8380.97	4.2441	distal	NM_001080418	DLGAP3	H1 ESC
chr1	35390424	35390777	35390611	5703.37	3.65137	distal	NM_001080418	DLGAP3	Hep G2
chr1	35390440	35390766	35390605	2813.89	3.70372	distal	NM_001080418	DLGAP3	GM12878
chr1	35390467	35390736	35390597	153.482	4.37049	distal	NM_001080418	DLGAP3	Neuron
chr1	35450653	35450792	35450782	53.7921	4.22383	prot	NM_001195156	ZMYM6NB	T cell
chr1	35497362	35497740	35497592	149.572	4.37049	prot	NM_007167	ZMYM6	Neuron
chr1	35544759	35544975	35544867	37.8952	4.2441	prot	NM_024772	ZMYM1	H1 ESC
chr1	35658540	35658787	35658696	92.8509	4.37049	prot	NM_005066	SFPQ	Neuron
chr1	35917828	35917962	35917925	108.325	3.92174	intron	NM_024874	KIAA0319L	HL-60
chr1	36005771	36005890	36005811	77.2228	4.31237	intron	NM_024874	KIAA0319L	SK-N-SH
chr1	36022731	36023195	36022962	404.239	4.22383	prot	NM_024874	KIAA0319L	T cell
chr1	36022823	36023105	36022967	136.854	4.0491	prot	NM_024874	KIAA0319L	ECC-1
chr1	36022823	36023134	36022974	265.099	3.92174	prot	NM_024874	KIAA0319L	HL-60
chr1	36022839	36023109	36022974	178.704	3.70372	prot	NM_024874	KIAA0319L	GM12878
chr1	36022841	36023101	36022971	94.1655	3.65137	prot	NM_024874	KIAA0319L	Hep G2
chr1	36022855	36023072	36022950	109.642	3.88906	prot	NM_024874	KIAA0319L	A549
chr1	36022858	36023091	36022989	449.924	4.84183	prot	NM_024874	KIAA0319L	K562
chr1	36022861	36023104	36022982	169.486	3.77151	prot	NM_024874	KIAA0319L	PFSK-1
chr1	36022865	36023109	36022972	141.363	4.31237	prot	NM_024874	KIAA0319L	SK-N-SH
chr1	36022873	36023089	36022979	99.5601	4.08618	prot	NM_024874	KIAA0319L	MCF-7
chr1	36022890	36023089	36022984	162.363	3.59073	prot	NM_024874	KIAA0319L	U87
chr1	36022915	36023045	36022992	131.349	4.2441	prot	NM_024874	KIAA0319L	H1 ESC
chr1	36022926	36023055	36022975	122.19	2.8183	prot	NM_024874	KIAA0319L	HeLa S3
chr1	36106033	36106249	36106141	77.4897	4.84183	intron	NM_002794	PSMB2	K562
chr1	36107009	36107499	36107254	90.0817	4.37049	prot	NM_002794	PSMB2	Neuron
chr1	36126332	36127120	36126752	2602.46	4.0491	distal	NM_002794	PSMB2	ECC-1
chr1	36126483	36126987	36126763	646.395	3.88906	distal	NM_002794	PSMB2	A549
chr1	36126491	36126966	36126773	1893.84	3.92174	distal	NM_002794	PSMB2	HL-60
chr1	36126505	36126946	36126757	1410.77	4.08618	distal	NM_002794	PSMB2	MCF-7
chr1	36126526	36126937	36126751	365.892	3.68797	distal	NM_002794	PSMB2	PANC-1
chr1	36126531	36126902	36126752	4181.14	4.2441	distal	NM_002794	PSMB2	H1 ESC
chr1	36126559	36126900	36126755	1391.46	3.55376	distal	NM_002794	PSMB2	HeLa S3
chr1	36126560	36126901	36126759	3270.95	4.84183	distal	NM_002794	PSMB2	K562
chr1	36126571	36126910	36126760	1170.01	4.31237	distal	NM_002794	PSMB2	SK-N-SH
chr1	36126579	36126919	36126756	644.145	3.77151	distal	NM_002794	PSMB2	PFSK-1
chr1	36126589	36126952	36126754	403.124	4.22383	distal	NM_002794	PSMB2	T cell
chr1	36126594	36126904	36126761	1055.28	3.65137	distal	NM_002794	PSMB2	Hep G2
chr1	36126601	36126892	36126751	353.641	3.59073	distal	NM_002794	PSMB2	U87
chr1	36126605	36126925	36126762	631.313	3.58512	distal	NM_002794	PSMB2	HCT-116
chr1	36126646	36126897	36126765	979.216	3.70372	distal	NM_002794	PSMB2	GM12878
chr1	36126702	36127206	36126954	67.32	3.68797	distal	NM_002794	PSMB2	PANC-1
chr1	36126716	36127232	36126974	96.0719	3.92174	distal	NM_002794	PSMB2	HL-60
chr1	36126792	36127116	36126954	115.716	4.22383	distal	NM_002794	PSMB2	T cell
chr1	36342486	36343032	36342781	2090.79	4.0491	distal	NM_012199	AGO1	ECC-1
chr1	36342521	36343006	36342782	1910.36	3.92174	distal	NM_012199	AGO1	HL-60
chr1	36342577	36342986	36342781	1237.54	4.08618	distal	NM_012199	AGO1	MCF-7
chr1	36342580	36342970	36342779	465.361	3.68797	distal	NM_012199	AGO1	PANC-1
chr1	36342582	36342929	36342770	315.54	4.22383	distal	NM_012199	AGO1	T cell
chr1	36342586	36343000	36342786	338.832	3.88906	distal	NM_012199	AGO1	A549
chr1	36342596	36342933	36342783	1084.92	4.31237	distal	NM_012199	AGO1	SK-N-SH
chr1	36342615	36342940	36342780	641.564	3.58512	distal	NM_012199	AGO1	HCT-116
chr1	36342618	36342931	36342780	692.951	3.77151	distal	NM_012199	AGO1	PFSK-1
chr1	36342626	36342927	36342780	3835.94	4.84183	distal	NM_012199	AGO1	K562
chr1	36342634	36342923	36342781	2028.04	3.65137	distal	NM_012199	AGO1	Hep G2
chr1	36342635	36342910	36342779	2652.57	4.2441	distal	NM_012199	AGO1	H1 ESC
chr1	36342639	36342921	36342783	1903.36	3.55376	distal	NM_012199	AGO1	HeLa S3
chr1	36342642	36342914	36342776	449.397	3.59073	distal	NM_012199	AGO1	U87
chr1	36342654	36342907	36342790	1026.5	3.70372	distal	NM_012199	AGO1	GM12878
chr1	36347598	36347998	36347811	558.409	4.0491	prot	NM_012199	AGO1	ECC-1
chr1	36347619	36347963	36347791	49.2607	3.3599	prot	NM_012199	AGO1	PFSK-1
chr1	36347644	36347960	36347809	306.298	3.92174	prot	NM_012199	AGO1	HL-60
chr1	36347654	36347961	36347810	248.609	4.08618	prot	NM_012199	AGO1	MCF-7
chr1	36347666	36347951	36347809	1299.78	4.84183	prot	NM_012199	AGO1	K562
chr1	36347681	36347938	36347809	145.723	3.68797	prot	NM_012199	AGO1	PANC-1
chr1	36347698	36347912	36347804	258.103	3.14103	prot	NM_012199	AGO1	HeLa S3
chr1	36347707	36347926	36347819	198.218	4.31237	prot	NM_012199	AGO1	SK-N-SH
chr1	36347734	36347864	36347824	97.9296	3.65137	prot	NM_012199	AGO1	Hep G2
chr1	36347773	36347871	36347799	124.286	4.2441	prot	NM_012199	AGO1	H1 ESC
chr1	36348565	36348825	36348695	105.814	3.65137	prot	NM_012199	AGO1	Hep G2
chr1	36348620	36348817	36348722	84.6721	4.22383	prot	NM_012199	AGO1	T cell
chr1	36348800	36349290	36349045	76.0468	4.37049	prot	NM_012199	AGO1	Neuron
chr1	36396637	36397127	36396882	82.6625	4.37049	prot	NM_177422	AGO3	Neuron
chr1	36554322	36554501	36554422	70.0045	4.22383	prot	NM_017825	ADPRHL2	T cell
chr1	36555455	36555671	36555563	74.6004	4.2441	intron	NM_017825	ADPRHL2	H1 ESC
chr1	36786817	36787033	36786925	86.6891	4.84183	exon	NM_001162530	SH3D21	K562
chr1	36832737	36832949	36832837	91.7954	4.22383	intron	NM_032017	STK40	T cell
chr1	36846295	36846511	36846403	55.8558	4.2441	intron	NM_032017	STK40	H1 ESC
chr1	36863197	36863687	36863442	89.5737	4.37049	prot	NM_032881	LSM10	Neuron
chr1	37068992	37069473	37069257	925.052	4.0491	inter	none	NA	ECC-1
chr1	37069049	37069445	37069253	656.81	4.08618	inter	none	NA	MCF-7
chr1	37069057	37069459	37069252	542.275	3.92174	inter	none	NA	HL-60
chr1	37069072	37069432	37069252	53.6229	2.82654	inter	none	NA	U87
chr1	37069079	37069437	37069240	233.386	3.68797	inter	none	NA	PANC-1
chr1	37069088	37069436	37069247	243.272	3.88906	inter	none	NA	A549
chr1	37069120	37069377	37069248	786.235	4.84183	inter	none	NA	K562
chr1	37069120	37069389	37069261	273.218	3.58512	inter	none	NA	HCT-116
chr1	37069123	37069381	37069256	1131.28	4.2441	inter	none	NA	H1 ESC
chr1	37069137	37069367	37069254	406.354	3.55376	inter	none	NA	HeLa S3
chr1	37069137	37069397	37069267	80.5521	3.65137	inter	none	NA	Hep G2
chr1	37069144	37069348	37069241	130.162	4.31237	inter	none	NA	SK-N-SH
chr1	37069182	37069364	37069255	72.5822	3.77151	inter	none	NA	PFSK-1
chr1	37069187	37069306	37069246	41.2718	4.22383	inter	none	NA	T cell
chr1	37119026	37119165	37119103	56.0472	4.0491	inter	none	NA	ECC-1
chr1	37160852	37161352	37161102	55.7797	4.0491	inter	none	NA	ECC-1
chr1	37269407	37269911	37269659	55.5514	2.87729	intron	NM_000831	GRIK3	PANC-1
chr1	37269470	37269846	37269658	36.675	0.9306	intron	NM_000831	GRIK3	HCT-116
chr1	37269542	37269782	37269672	554.047	4.2441	intron	NM_000831	GRIK3	H1 ESC
chr1	37269547	37269798	37269661	99.7146	4.0491	intron	NM_000831	GRIK3	ECC-1
chr1	37269560	37269786	37269664	135.731	3.92174	intron	NM_000831	GRIK3	HL-60
chr1	37269562	37269771	37269665	91.417	4.08618	intron	NM_000831	GRIK3	MCF-7
chr1	37269565	37269754	37269665	212.329	4.84183	intron	NM_000831	GRIK3	K562
chr1	37269599	37269736	37269663	123.228	2.81683	intron	NM_000831	GRIK3	HeLa S3
chr1	37331810	37332128	37331982	159.918	4.0491	intron	NM_000831	GRIK3	ECC-1
chr1	37331817	37332145	37331972	314.397	4.08618	intron	NM_000831	GRIK3	MCF-7
chr1	37331821	37332145	37331978	273.244	3.92174	intron	NM_000831	GRIK3	HL-60
chr1	37331867	37332091	37331969	530.608	4.2441	intron	NM_000831	GRIK3	H1 ESC
chr1	37331872	37332092	37331975	141.953	3.58512	intron	NM_000831	GRIK3	HCT-116
chr1	37331874	37332091	37331972	262.467	4.84183	intron	NM_000831	GRIK3	K562
chr1	37331882	37332073	37331967	183.885	2.99361	intron	NM_000831	GRIK3	HeLa S3
chr1	37331885	37332106	37331975	101.624	3.68797	intron	NM_000831	GRIK3	PANC-1
chr1	37331888	37332004	37331971	102.569	3.65137	intron	NM_000831	GRIK3	Hep G2
chr1	37388520	37388736	37388628	37.6288	4.2441	intron	NM_000831	GRIK3	H1 ESC
chr1	37389727	37390278	37390006	2164.7	4.22383	intron	NM_000831	GRIK3	T cell
chr1	37389750	37390428	37390006	3896.57	3.92174	intron	NM_000831	GRIK3	HL-60
chr1	37389753	37390293	37390006	2261.98	4.0491	intron	NM_000831	GRIK3	ECC-1
chr1	37389757	37390251	37390008	663.536	3.88906	intron	NM_000831	GRIK3	A549
chr1	37389765	37390250	37390003	793.356	3.68797	intron	NM_000831	GRIK3	PANC-1
chr1	37389777	37390236	37390007	1964.84	4.08618	intron	NM_000831	GRIK3	MCF-7
chr1	37389812	37390192	37389988	819.3	3.59073	intron	NM_000831	GRIK3	U87
chr1	37389816	37390188	37390002	1654.21	3.58512	intron	NM_000831	GRIK3	HCT-116
chr1	37389816	37390198	37389991	1088.23	3.77151	intron	NM_000831	GRIK3	PFSK-1
chr1	37389852	37390161	37390004	4645.21	4.84183	intron	NM_000831	GRIK3	K562
chr1	37389853	37390170	37389999	1813.46	3.65137	intron	NM_000831	GRIK3	Hep G2
chr1	37389857	37390181	37390019	3706.98	4.2441	intron	NM_000831	GRIK3	H1 ESC
chr1	37389860	37390147	37389997	2258.57	3.70372	intron	NM_000831	GRIK3	GM12878
chr1	37389862	37390142	37390002	70.2384	4.31237	intron	NM_000831	GRIK3	SK-N-SH
chr1	37389867	37390147	37390002	1750.41	3.55376	intron	NM_000831	GRIK3	HeLa S3
chr1	37389899	37390118	37390006	95.195	4.37049	intron	NM_000831	GRIK3	Neuron
chr1	37431680	37432392	37432063	2070.14	4.0491	intron	NM_000831	GRIK3	ECC-1
chr1	37431682	37432390	37432063	2216.24	3.92174	intron	NM_000831	GRIK3	HL-60
chr1	37431786	37432297	37432072	1755.37	4.08618	intron	NM_000831	GRIK3	MCF-7
chr1	37431825	37432300	37432066	422.493	3.88906	intron	NM_000831	GRIK3	A549
chr1	37431842	37432290	37432069	570.312	3.68797	intron	NM_000831	GRIK3	PANC-1
chr1	37431847	37432252	37432053	828.925	4.22383	intron	NM_000831	GRIK3	T cell
chr1	37431854	37432215	37432052	672.427	3.59073	intron	NM_000831	GRIK3	U87
chr1	37431865	37432233	37432070	739.555	3.77151	intron	NM_000831	GRIK3	PFSK-1
chr1	37431889	37432240	37432063	899.855	3.58512	intron	NM_000831	GRIK3	HCT-116
chr1	37431890	37432205	37432073	1866.06	3.65137	intron	NM_000831	GRIK3	Hep G2
chr1	37431900	37432208	37432063	3440.52	4.2441	intron	NM_000831	GRIK3	H1 ESC
chr1	37431905	37432209	37432071	3177.8	4.84183	intron	NM_000831	GRIK3	K562
[truncated: 65,189 more rows]
